# Supplementary material for: Methods for cell isolation and analysis of the highly regenerative tunicate Polycarpa mytiligera
Source: Frontiers journal article supplement (doi:10.3389/fcell.2023.1274826), 2023-10-11
Supplement: Data_Sheet_1.PDF [file Data_Sheet_1.PDF]

## Supplementary Material

### Methods for cell isolation and analysis of the highly regenerative tunicate *Polycarpa mytiligera*

Tal gordon, Noam Hendin, Omri Wurtzel\*

\* Correspondence: [owurtzel@tauex.tau.ac.il](mailto:owurtzel@tauex.tau.ac.il)

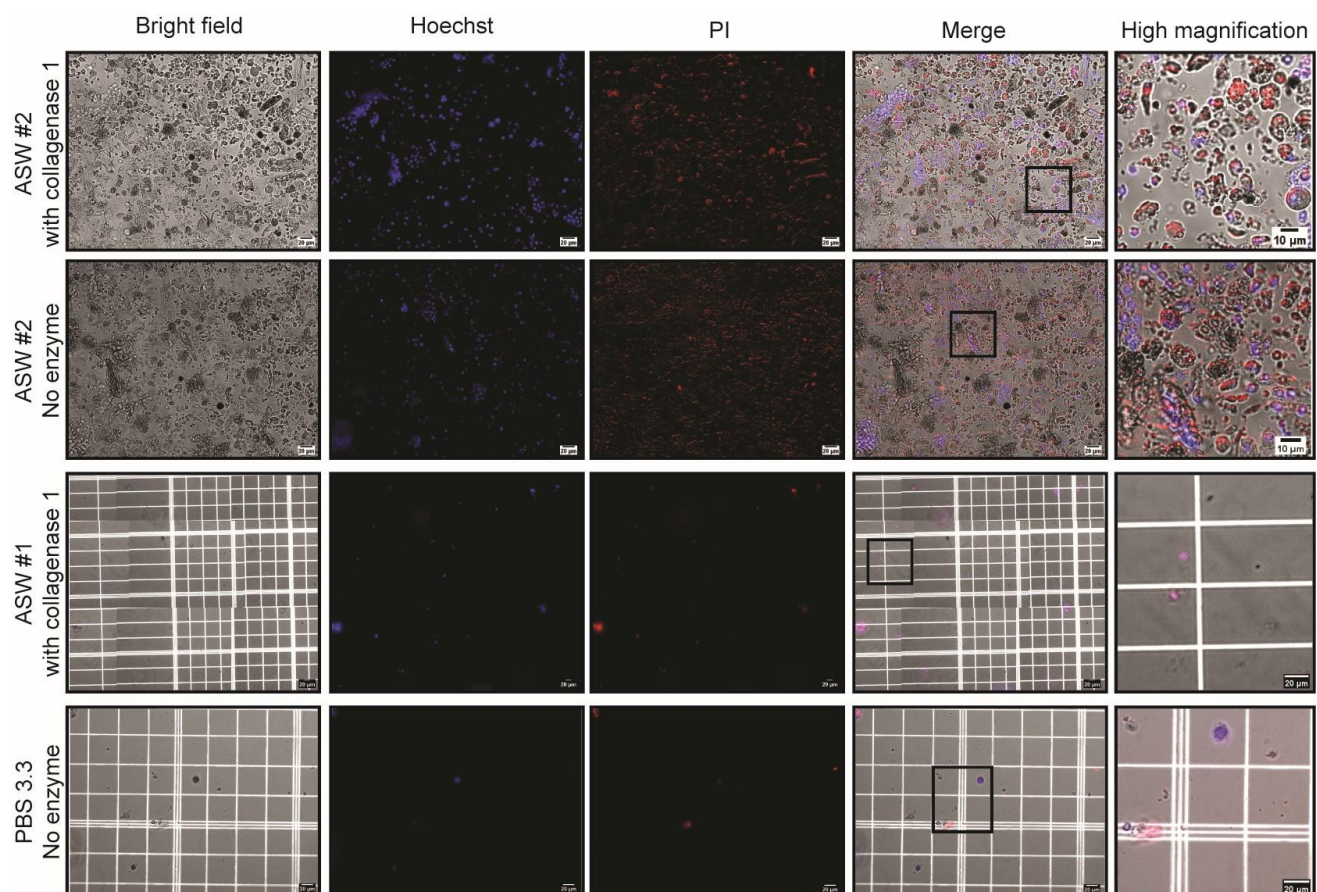

**Supplementary Figure 1.** *P. mytiligera*'s isolated cells following tissues dissociation using different media compositions and enzymatic treatments. Cells were labeled with nuclear dye (Hoechst) and viability dye (propidium iodide, PI). The use of ASW #2 medium was favorable, either when used with collagenase 1 or without enzymatic treatment. Using PBS or ASW #1 as the dissociation media resulted in extremely poor cellular recovery and cell viability (Methods).
