# Supplementary material for: Methods for cell isolation and analysis of the highly regenerative tunicate Polycarpa mytiligera
Source: Front Cell Dev Biol. 2023 Oct 11;11:1274826. doi: 10.3389/fcell.2023.1274826 (PMC10598751; doi:10.3389/fcell.2023.1274826)
Supplement: Supplementary file 2 [file Table1.XLSX]

## Sheet: גיליון1
Supplementary Table 1. Gene expression in RNA-sequencing libraries of contigs having BLAST hits against UNIPROT.
Contig	Gene expression (VSD transformed)				Annotation
	Library #1	Library #2	Library #3	Library #4	UNIPROT	ID	BLAST e-value
DN379918_c0_g1_i1	5.25126	5.35898	5.86146	5.2452	Q9CQV8	1433B_MOUSE	0
DN20177_c0_g1_i1	8.04232	7.51715	7.69348	8.59805	P54612	2AAA_PIG	0
DN901_c0_g1_i1	8.6791	8.37692	8.79209	8.55392	P52209	6PGD_HUMAN	0
DN13208_c0_g1_i5	6.32934	6.75125	6.95136	6.74004	P07758	A1AT1_MOUSE	0
DN484768_c0_g1_i1	5.02386	5.57338	5.78252	5.76095	P51912	AAAT_MOUSE	0
DN1430_c0_g1_i2	8.56736	8.39476	9.00295	8.40829	P00507	AATM_RAT	0
DN7208_c0_g1_i1	7.91446	6.86909	7.69348	8.63316	Q5MB13	ABCG2_MACMU	0
DN4646_c0_g1_i10	6.39011	7.13678	5.20346	6.78344	P11029	ACAC_CHICK	0
DN4646_c0_g1_i11	5.36433	5.90691	5.20346	5.96376	P11029	ACAC_CHICK	0
DN10086_c1_g1_i5	6.29786	6.68333	4.16106	6.31087	P11029	ACAC_CHICK	0
DN10086_c1_g1_i7	5.97312	6.63264	4.16106	6.1606	P11029	ACAC_CHICK	0
DN7302_c0_g1_i5	6.49017	6.53632	6.40866	6.56786	Q9UKU7	ACAD8_HUMAN	0
DN309730_c0_g1_i1	5.32811	5.32869	5.93551	6.94451	A0QX20	ACNA_MYCS2	0
DN105734_c0_g1_i1	7.51044	8.05642	9.01856	7.86033	P13516	ACOD1_MOUSE	0
DN3816_c0_g1_i1	8.96533	8.82766	8.59787	9.43402	Q99KI0	ACON_MOUSE	0
DN100_c0_g3_i1	10.113	8.56978	10.1867	8.90299	Q26065	ACT_PLAMG	0
DN4936_c0_g1_i1	5.39927	4.99765	5.20346	7.10012	P41340	ACT3_LIMPO	0
DN100_c0_g1_i2	7.47713	7.59685	5.69783	6.82551	P84185	ACT5C_ANOGA	0
DN14095_c0_g1_i3	5.36433	5.97738	6.45727	5.72891	P60707	ACTB_TRIVU	0
DN14095_c0_g1_i2	5.25126	5.52376	6.38366	5.9368	P60707	ACTB_TRIVU	0
DN100_c0_g1_i8	12.1004	11.2022	11.1514	11.5644	P53461	ACTC_HALRO	0
DN100_c0_g1_i4	10.5903	10.5108	10.7247	11.1093	P12716	ACTC_PISOC	0
DN3037_c0_g1_i2	9.16303	8.66832	7.43679	7.72154	P05094	ACTN1_CHICK	0
DN76666_c0_g1_i4	6.28182	6.85161	5.39618	5.34345	P05094	ACTN1_CHICK	0
DN76666_c0_g1_i1	6.19855	6.93689	5.4528	5.34345	P20111	ACTN2_CHICK	0
DN407243_c0_g1_i1	5.58714	5.88864	6.63572	5.88102	Q60994	ADIPO_MOUSE	0
DN345553_c0_g1_i3	4.9696	5.66633	5.27216	5.07429	P25962	ADRB3_MOUSE	0
DN18022_c0_g1_i2	7.67788	7.91906	7.85078	7.25031	Q9Y4W6	AFG32_HUMAN	0
DN17740_c0_g1_i8	5.52816	5.71006	4.56238	5.85212	Q9UKV8	AGO2_HUMAN	0
DN17740_c0_g1_i10	5.49741	5.90691	4.16106	5.62698	Q9QZ81	AGO2_RAT	0
DN9563_c0_g1_i18	5.02386	7.77619	4.85179	4.16106	O94788	AL1A2_HUMAN	0
DN545_c0_g1_i7	6.75206	7.20663	6.3322	6.95712	Q7SY23	AL4A1_DANRE	0
DN279913_c0_g1_i1	6.89208	7.59685	7.50545	7.1879	P07724	ALBU_MOUSE	0
DN386981_c0_g1_i1	5.46572	5.62083	6.22276	5.69594	P47738	ALDH2_MOUSE	0
DN28_c0_g1_i2	8.5356	9.19762	9.58014	9.50304	Q2XQV4	ALDH2_PIG	0
DN3868_c0_g1_i3	9.88805	9.56295	9.47101	9.71607	P05063	ALDOC_MOUSE	0
DN8239_c0_g1_i2	5.12227	5.96014	4.56238	5.43267	O96935	AMP1_PLAFQ	0
DN192181_c0_g1_i1	5.07456	5.52376	4.16106	6.49937	Q6A9W5	AMPA_CUTAK	0
DN3614_c0_g1_i5	7.29771	7.82981	7.87682	7.26044	Q01433	AMPD2_HUMAN	0
DN2615_c0_g1_i1	8.80157	8.75595	8.56633	8.37638	Q8IWZ3	ANKH1_HUMAN	0
DN2615_c0_g1_i9	6.39011	6.22503	4.95619	5.38906	O75179	ANR17_HUMAN	0
DN1229_c0_g1_i3	7.16957	7.602	8.37322	8.13605	Q9BXS5	AP1M1_HUMAN	0
DN139344_c0_g1_i2	7.7575	8.10425	7.58157	8.13059	Q5ZMP6	AP2M1_CHICK	0
DN419886_c0_g1_i1	5.93122	5.54886	5.60631	5.38905	P15943	APLP2_RAT	0
DN392649_c0_g1_i2	5.46572	6.04403	5.82265	6.01596	Q00623	APOA1_MOUSE	0
DN480860_c0_g1_i1	6.94236	7.41519	7.98447	7.13369	P08226	APOE_MOUSE	0
DN169961_c0_g1_i1	5.61547	4.9011	5.50647	5.34345	Q6A816	ARLY_CUTAK	0
DN6551_c0_g1_i9	7.10081	7.92317	8.11402	8.18429	Q66I24	ASSY_DANRE	0
DN133065_c0_g1_i1	5.07456	5.62083	5.33615	5.19187	P16460	ASSY_MOUSE	0
DN136913_c0_g3_i3	5.21031	5.23156	4.16106	5.82251	Q06734	ASSY_STRLA	0
DN18139_c0_g1_i10	5.74727	7.03273	4.85179	6.09036	O54827	AT10A_MOUSE	0
DN354982_c0_g2_i1	6.75206	5.7928	7.09316	5.99014	P06686	AT1A2_RAT	0
DN5747_c0_g1_i8	8.59843	9.14249	8.14287	8.35315	P13637	AT1A3_HUMAN	0
DN18802_c0_g1_i2	6.41948	6.75125	4.16106	4.93646	P13585	AT2A1_CHICK	0
DN2086_c0_g1_i7	6.1278	6.84278	4.56238	4.65498	P70083	AT2A1_MAKNI	0
DN20864_c0_g1_i1	5.49741	6.63264	6.19389	5.07429	P20647	AT2A2_RABIT	0
DN11770_c0_g1_i5	6.01363	6.06014	4.56238	5.0085	Q16720	AT2B3_HUMAN	0
DN450832_c0_g1_i1	5.32811	5.59736	4.56238	5.13512	Q7PPA5	ATC1_ANOGA	0
DN45322_c0_g1_i10	5.79601	4.95099	5.33615	4.65498	P13607	ATNA_DROME	0
DN256015_c0_g1_i1	5.12227	5.75217	6.22276	6.09036	Q6A8C5	ATPA_CUTAK	0
DN16859_c1_g1_i1	5.32811	5.32869	5.78251	5.2452	Q03265	ATPA_MOUSE	0
DN16859_c0_g2_i3	10.1842	9.68247	9.86096	10.5279	P80021	ATPA_PIG	0
DN6054_c0_g1_i9	6.01363	5.64381	5.55755	6.1606	P12862	ATPAM_WHEAT	0
DN42468_c0_g1_i1	6.05285	5.35898	6.54946	6.53405	Q6A8C7	ATPB_CUTAK	0
DN420778_c0_g1_i2	5.52816	6.04403	6.27864	5.76095	P56480	ATPB_MOUSE	0
DN7156_c0_g1_i1	9.81204	9.26853	9.45677	10.4612	P10719	ATPB_RAT	0
DN3947_c0_g1_i7	5.32811	6.43252	5.20346	5.96376	P59384	ATS15_MOUSE	0
DN11652_c0_g2_i8	5.07456	6.68333	4.56238	6.20535	Q9UKP5	ATS6_HUMAN	0
DN11652_c0_g2_i1	5.55806	6.94513	5.20346	6.33098	Q9UKP5	ATS6_HUMAN	0
DN432700_c0_g1_i1	5.43304	5.75217	5.4528	5.47449	O35490	BHMT1_MOUSE	0
DN30086_c0_g1_i1	10.3967	5.71006	6.48092	6.04126	A1B1Z0	BIOB1_PARDP	0
DN251671_c0_g1_i1	4.47008	4.78843	6.35818	5.2452	Q6A6M4	BIOWF_CUTAK	0
DN1336_c0_g1_i1	9.88554	10.2806	9.90985	10.3787	Q90593	BIP_CHICK	0
DN1336_c0_g2_i1	5.39927	5.52376	5.82265	5.62698	P20029	BIP_MOUSE	0
DN1897_c0_g1_i1	4.77563	5.77266	5.27216	5.76095	P62594	BLAT_SALTI	0
DN1897_c0_g1_i11	5.12227	5.64381	5.60631	5.5147	P62594	BLAT_SALTI	0
DN1897_c0_g1_i13	5.12227	5.7313	5.9709	6.20535	P62594	BLAT_SALTI	0
DN1897_c0_g1_i6	5.39927	5.47171	6.03877	5.99014	P62594	BLAT_SALTI	0
DN329894_c1_g1_i1	5.25126	5.41692	4.16106	6.20535	Q9AIX7	BOXB_AZOEV	0
DN7002_c0_g1_i2	5.25126	5.6884	6.10312	5.5147	O14981	BTAF1_HUMAN	0
DN261598_c0_g1_i1	5.99354	5.97738	4.16106	4.16106	Q922D8	C1TC_MOUSE	0
DN21612_c2_g1_i1	7.328	7.80325	8.65894	7.76462	P16015	CAH3_MOUSE	0
DN3885_c0_g1_i1	7.50384	7.08573	6.59328	5.59082	P24643	CALX_CANLF	0
DN10615_c0_g1_i1	5.07456	6.21089	4.16106	5.47449	O14815	CAN9_HUMAN	0
DN2853_c0_g1_i6	5.97312	5.99439	5.78251	6.1606	Q62717	CAPS1_RAT	0
DN304128_c0_g1_i1	5.99354	4.72307	6.19389	5.2956	Q6A914	CARB_CUTAK	0
DN38163_c0_g1_i1	6.09088	5.66633	6.67687	5.76095	C5CCF1	CARB_MICLC	0
DN7598_c0_g1_i3	6.94236	7.4093	7.37691	7.84704	Q13948	CASP_HUMAN	0
DN4411_c0_g1_i2	10.3772	10.6714	10.2241	10.0167	Q64405	CATA_CAVPO	0
DN307486_c0_g3_i2	5.4974	5.52376	4.85179	4.65498	P29422	CATA_MICLU	0
DN274698_c2_g1_i1	5.32811	5.64381	5.50647	5.07429	P24270	CATA_MOUSE	0
DN389908_c0_g1_i1	5.32811	5.49806	5.93551	5.59082	P10605	CATB_MOUSE	0
DN468020_c0_g1_i1	5.25126	5.62083	6.03877	5.34345	P18242	CATD_MOUSE	0
DN9844_c0_g1_i2	6.05285	6.59068	4.56238	6.37031	Q6YHK3	CD109_HUMAN	0
DN121462_c1_g1_i1	5.74727	5.83207	6.527	5.59082	Q08857	CD36_MOUSE	0
DN14658_c0_g1_i1	5.86553	5.92492	4.16106	5.2956	Q2KJC1	CDC5L_BOVIN	0
DN16001_c0_g2_i1	6.89208	7.13678	6.84805	7.53486	Q6GLD8	CDK9_XENTR	0
DN466032_c0_g1_i1	5.58714	5.54886	6.19389	5.62698	P53566	CEBPA_MOUSE	0
DN163226_c0_g1_i1	5.46572	5.08318	5.55755	5.2956	Q8VCT4	CES1D_MOUSE	0
DN59868_c0_g1_i1	6.83991	7.27964	8.06963	7.31005	P03953	CFAD_MOUSE	0
DN19064_c0_g1_i5	6.14586	5.99439	5.60631	6.18317	A1R3H9	CH601_PAEAT	0
DN12479_c0_g1_i1	4.16106	5.92492	6.16435	4.76453	Q6A6W2	CH602_CUTAK	0
DN191892_c0_g1_i2	10.1438	10.133	10.5126	9.91277	Q12873	CHD3_HUMAN	0
DN7748_c0_g1_i9	5.36433	5.97738	5.04733	5.62698	A2AJK6	CHD7_MOUSE	0
DN87402_c1_g1_i2	5.39928	4.84725	6.83006	6.46376	P9WPD5	CISY1_MYCTU	0
DN100979_c0_g1_i1	4.69429	4.64854	5.69783	6.11421	P9WPD5	CISY1_MYCTU	0
DN99378_c1_g1_i1	6.54414	5.99439	6.98414	6.91894	P29742	CLH_DROME	0
DN2240_c0_g1_i2	6.91241	6.61182	4.56238	5.69594	Q00610	CLH1_HUMAN	0
DN2240_c0_g1_i4	6.72919	7.82101	4.16106	6.01596	Q00610	CLH1_HUMAN	0
DN2240_c0_g1_i1	6.64597	6.16751	4.16106	5.69594	Q68FD5	CLH1_MOUSE	0
DN4621_c0_g1_i3	8.09567	8.38289	8.43276	8.33902	P49760	CLK2_HUMAN	0
DN2920_c0_g1_i1	7.97745	7.88149	7.82425	8.30066	Q9D1A2	CNDP2_MOUSE	0
DN20375_c1_g1_i1	7.16116	7.46141	7.47154	7.2401	A0JP85	CNOT1_XENTR	0
DN549_c0_g1_i10	9.95786	11.5574	10.922	10.809	P02466	CO1A2_RAT	0
DN549_c0_g1_i16	10.0014	11.5803	10.8948	10.8209	Q6P4Z2	CO2A1_XENTR	0
DN383701_c0_g1_i3	5.74727	6.06014	6.50416	5.9368	P01027	CO3_MOUSE	0
DN636_c0_g1_i8	7.7352	9.17376	6.3057	8.18429	P17139	CO4A1_CAEEL	0
DN636_c0_g1_i13	7.55578	9.03115	6.54946	8.24619	P17139	CO4A1_CAEEL	0
DN636_c0_g1_i7	8.66743	9.83689	8.8887	9.66804	P17139	CO4A1_CAEEL	0
DN2530_c0_g1_i11	7.88442	9.02545	8.03155	8.20522	P08120	CO4A1_DROME	0
DN2530_c0_g1_i5	7.85889	9.02925	8.06963	8.26624	P08120	CO4A1_DROME	0
DN60370_c0_g1_i1	6.9522	7.57603	7.51658	6.72526	P53621	COPA_HUMAN	0
DN14962_c0_g1_i1	6.19855	6.30675	4.56238	6.13761	Q8CIE6	COPA_MOUSE	0
DN28045_c0_g1_i2	5.25126	5.12275	4.16106	6.13761	Q66HV4	COPB_DANRE	0
DN3683_c0_g1_i2	6.28182	6.33289	6.45727	6.48168	Q5R664	COPB2_PONAB	0
DN12979_c0_g1_i3	7.77945	7.58648	8.7784	7.61565	P53619	COPD_BOVIN	0
DN103217_c0_g2_i1	5.43304	5.29741	5.20346	5.19187	O99252	COX1_PLABE	0
DN43003_c0_g1_i2	5.58714	5.29741	4.85179	5.07429	P68539	COX1_WHEAT	0
DN16558_c0_g2_i1	5.86553	6.29348	6.65646	5.96376	Q05421	CP2E1_MOUSE	0
DN1868_c0_g1_i4	8.09567	9.36048	9.63934	9.78524	Q8IZJ3	CPMD8_HUMAN	0
DN3401_c0_g1_i17	7.56847	7.53885	5.20346	5.88102	Q8CJ40	CROCC_MOUSE	0
DN3401_c0_g1_i12	7.39385	7.51715	5.20346	5.43267	Q8CJ40	CROCC_MOUSE	0
DN3401_c0_g1_i15	7.63029	7.40339	5.65301	5.55343	Q8CJ40	CROCC_MOUSE	0
DN3401_c0_g1_i6	7.517	7.51168	5.04733	5.13512	Q8CJ40	CROCC_MOUSE	0
DN3401_c0_g1_i10	7.71255	7.40339	5.4528	5.34345	Q8CJ40	CROCC_MOUSE	0
DN9152_c0_g1_i1	8.52917	8.64121	8.96318	8.82418	Q5R416	CTNA2_PONAB	0
DN6095_c0_g1_i1	8.38689	8.43554	8.69826	9.08296	P35224	CTNB_URECA	0
DN6095_c0_g1_i10	8.26814	8.45267	8.54492	9.03421	P35222	CTNB1_HUMAN	0
DN7615_c0_g1_i9	6.72919	5.83207	6.45727	6.75466	B5DF89	CUL3_RAT	0
DN487482_c0_g1_i1	5.12227	5.6884	5.04733	5.13512	Q9D0M3	CY1_MOUSE	0
DN70129_c0_g1_i3	5.29047	5.19676	7.50545	6.20535	P0AAE0	CYCA_ECOLI	0
DN162304_c0_g1_i1	7.5873	7.31792	7.62329	7.47544	Q90YM8	CYFP1_DANRE	0
DN499879_c0_g1_i1	5.72211	6.26653	4.56238	5.07429	Q6GQD1	CYFP2_XENLA	0
DN8515_c0_g1_i14	6.9813	6.82496	5.129	5.34345	Q3UHC7	DAB2P_MOUSE	0
DN117_c94_g1_i1	13.3609	14.3065	13.7577	13.7829	P24782	DBP2_SCHPO	0
DN3599_c0_g1_i1	7.67788	8.30326	7.76037	7.00644	Q0III3	DC1I2_BOVIN	0
DN156517_c0_g1_i4	6.80762	6.97763	5.78252	7.40431	Q3ZBV2	DD19A_BOVIN	0
DN995_c0_g1_i1	7.77945	8.45267	7.93579	8.56609	Q92841	DDX17_HUMAN	0
DN995_c0_g1_i6	8.06479	8.75135	8.16413	8.69355	Q501J6	DDX17_MOUSE	0
DN23358_c0_g1_i1	7.05605	6.8069	7.47154	7.60777	Q9NVP1	DDX18_HUMAN	0
DN411112_c0_g1_i2	5.72211	5.29741	5.78252	4.76453	Q61656	DDX5_MOUSE	0
DN81095_c0_g1_i1	6.63366	7.41519	6.27864	5.72891	P54823	DDX6_MOUSE	0
DN248219_c0_g1_i1	5.32811	5.77266	6.19389	5.47449	Q9DCV3	DGAT2_MOUSE	0
DN21118_c0_g1_i3	6.24916	7.08573	6.07136	6.06605	Q16760	DGKD_HUMAN	0
DN240469_c0_g1_i1	6.96197	7.92317	7.38909	7.31005	P00367	DHE3_HUMAN	0
DN9960_c0_g1_i2	9.11233	8.47519	10.0049	9.24038	O60231	DHX16_HUMAN	0
DN92_c0_g1_i1	9.09503	8.90841	8.6934	8.17901	Q9Z207	DIAP3_MOUSE	0
DN92_c0_g1_i6	7.82237	7.93136	7.22185	7.76462	Q9Z207	DIAP3_MOUSE	0
DN14466_c0_g1_i6	7.36496	7.04808	6.75561	6.86633	P09623	DLDH_PIG	0
DN14466_c0_g1_i1	7.08308	6.94513	6.79334	7.10012	P09623	DLDH_PIG	0
DN14466_c0_g1_i7	7.15269	7.06326	6.95136	7.0185	P09623	DLDH_PIG	0
DN412814_c0_g1_i1	4.16106	4.72307	5.65301	6.01596	Q6ABL5	DNAA_CUTAK	0
DN416326_c0_g1_i1	4.91098	5.71006	6.38366	5.13512	Q6ABX1	DNAB_LEIXX	0
DN255168_c0_g1_i1	4.59726	5.8126	6.91777	6.16059	Q6A997	DNAJ1_CUTAK	0
DN81_c8_g1_i3	5.93122	4.99765	5.4528	5.34345	B8EIP9	DNAK_METSB	0
DN16646_c0_g1_i1	8.61675	8.424	8.51769	8.90936	Q7TQ20	DNJC2_RAT	0
DN326391_c0_g1_i1	5.29047	5.04157	6.1341	6.51682	Q6A7A2	DNLJ_CUTAK	0
DN3147_c0_g1_i8	8.13442	8.21225	5.55755	7.34852	Q9NDJ2	DOM_DROME	0
DN3147_c0_g1_i10	8.2408	8.33749	5.55755	7.59189	Q9NDJ2	DOM_DROME	0
DN265014_c0_g1_i1	5.69638	5.87008	5.60631	6.2486	P46835	DPO1_MYCLE	0
DN355507_c0_g1_i1	6.01363	4.78843	6.251	6.31087	P9WNT7	DPO3A_MYCTU	0
DN205234_c0_g1_i3	5.07456	5.75217	4.72681	5.59082	Q6A763	DPO4_CUTAK	0
DN35622_c0_g1_i1	7.03774	7.56021	7.35222	6.89288	O55096	DPP3_RAT	0
DN17539_c0_g1_i1	8.74719	8.5776	9.20739	8.89979	Q5WR10	DX39B_CANLF	0
DN79182_c0_g1_i1	4.77563	4.16106	5.12901	6.2486	Q89KP9	DXR_BRADU	0
DN68761_c0_g1_i2	5.29047	5.44468	5.60631	5.55343	Q6A8V3	DXS_CUTAK	0
DN167201_c0_g1_i1	5.46572	5.7313	5.69783	5.43267	Q6A8V3	DXS_CUTAK	0
DN18851_c0_g1_i1	7.02849	6.96957	5.89906	6.13761	Q8TD57	DYH3_HUMAN	0
DN25465_c0_g1_i1	5.81964	6.29348	4.16106	5.07429	Q8TE73	DYH5_HUMAN	0
DN9354_c0_g1_i1	5.95235	6.86038	4.56238	6.33098	Q14204	DYHC1_HUMAN	0
DN51186_c0_g1_i2	5.72211	6.35851	4.16106	6.22716	Q14204	DYHC1_HUMAN	0
DN98859_c0_g1_i2	7.00981	6.53632	4.72681	6.11421	Q9JHU4	DYHC1_MOUSE	0
DN51186_c0_g1_i3	5.32811	6.35851	4.16106	5.88102	P38650	DYHC1_RAT	0
DN487958_c0_g1_i1	6.19855	5.83207	6.38366	6.31087	P27619	DYN_DROME	0
DN2277_c0_g1_i5	7.7575	6.84278	7.18025	7.99884	Q29554	ECHA_PIG	0
DN148_c0_g1_i4	9.22796	10.1575	9.54826	9.0773	Q92005	EF1A_DANRE	0
DN3060_c0_g1_i3	5.32811	5.88864	5.33615	5.34345	Q00080	EF1A_PLAFK	0
DN3060_c0_g1_i2	5.32811	5.6884	4.95619	5.2956	Q00080	EF1A_PLAFK	0
DN27418_c0_g1_i1	5.43304	5.66633	5.39618	5.62698	Q8LPC4	EF1A_PYRYE	0
DN148_c0_g1_i11	13.3303	13.6538	14.4145	14.0831	P08736	EF1A1_DROME	0
DN49185_c0_g1_i2	6.37518	7.00151	7.99243	7.04231	P62630	EF1A1_RAT	0
DN26881_c0_g1_i4	10.5168	10.7837	10.9313	10.8853	Q90705	EF2_CHICK	0
DN26881_c0_g1_i7	10.3574	10.731	10.9385	10.7049	Q90705	EF2_CHICK	0
DN116801_c0_g1_i1	5.25126	5.16055	5.65301	5.38905	Q23716	EF2_CRYPV	0
DN353978_c1_g1_i1	6.10947	6.15272	7.12279	6.09036	P58252	EF2_MOUSE	0
DN98887_c0_g1_i2	6.14586	5.08318	5.65301	4.16106	B7GJ64	EFG_ANOFW	0
DN32135_c0_g1_i1	5.32811	5.49806	5.74095	5.9368	Q6A6L5	EFG_CUTAK	0
DN202737_c0_g1_i3	4.91098	5.19676	6.75561	5.43267	Q6A7J8	EFTS_CUTAK	0
DN6569_c0_g1_i1	5.7719	6.62227	4.16106	5.5147	Q641Z6	EHD1_RAT	0
DN179211_c0_g1_i1	5.46572	5.38837	5.27216	5.38905	Q4G061	EIF3B_RAT	0
DN1394_c0_g1_i1	8.93889	8.99074	9.91611	9.65673	Q7ZTM9	EIF3D_XENLA	0
DN11683_c0_g1_i1	7.83814	7.27316	8.44438	8.4483	Q3T102	EIF3E_BOVIN	0
DN2903_c0_g2_i13	7.32048	6.57998	6.88335	6.72526	O00423	EMAL1_HUMAN	0
DN17330_c2_g1_i1	5.07456	5.49806	5.55755	5.2452	Q8IJN7	ENO_PLAF7	0
DN7040_c0_g1_i1	8.67035	8.11507	8.02381	9.02249	Q9PVK2	ENOA_ALLMI	0
DN415879_c0_g1_i1	5.58714	5.57338	6.03877	5.5147	P17182	ENOA_MOUSE	0
DN4247_c0_g1_i2	6.10947	7.42689	5.65301	5.88102	Q95M18	ENPL_BOVIN	0
DN4247_c0_g1_i17	8.6791	9.27496	8.57692	8.85424	Q95M18	ENPL_BOVIN	0
DN4247_c0_g1_i19	8.65566	9.27656	8.65395	8.68242	P41148	ENPL_CANLF	0
DN409338_c0_g1_i2	5.25126	5.49806	5.74095	5.0085	P08113	ENPL_MOUSE	0
DN3232_c0_g1_i2	7.55578	7.65753	8.02381	7.84704	Q1RMT1	ERCC3_BOVIN	0
DN2729_c0_g1_i1	7.87426	7.86019	8.39134	8.43509	Q9GR88	ERF1_POLMI	0
DN32091_c0_g1_i4	6.28182	5.7928	6.54946	5.43267	Q8R050	ERF3A_MOUSE	0
DN1910_c0_g1_i1	8.5452	8.50833	9.03015	9.2778	A5PKH3	FAAA_BOVIN	0
DN65541_c0_g1_i3	7.02849	5.32869	5.39618	5.2452	P45382	FADH_PARDE	0
DN409590_c0_g1_i1	6.41948	6.25285	7.04748	6.35079	P19096	FAS_MOUSE	0
DN409590_c0_g2_i1	6.16366	6.38365	7.12279	6.44559	P19096	FAS_MOUSE	0
DN97820_c0_g1_i5	5.29047	5.32869	5.39618	5.19187	P12785	FAS_RAT	0
DN450868_c0_g1_i1	5.21031	4.16106	4.16106	7.1447	P15368	FAS2_PENPA	0
DN87_c0_g1_i3	12.219	13.856	10.9241	12.4815	Q61555	FBN2_MOUSE	0
DN135924_c0_g2_i1	7.03774	4.78843	5.27216	4.16106	P24183	FDNG_ECOLI	0
DN46520_c0_g1_i1	5.36433	4.78843	6.19389	5.0085	A5KAL1	FEN1_PLAVS	0
DN434710_c0_g1_i1	5.29047	5.54886	5.55755	5.07429	P29699	FETUA_MOUSE	0
DN5211_c0_g1_i1	7.22707	8.0676	9.55094	8.68614	Q95YM9	FGFR_HALRO	0
DN481203_c0_g1_i1	5.16741	5.44468	5.50647	5.2956	E9PV24	FIBA_MOUSE	0
DN416086_c0_g1_i1	5.12227	5.35898	5.12901	5.47449	Q8VCM7	FIBG_MOUSE	0
DN1535_c0_g1_i2	6.86102	7.98743	7.82425	7.05407	Q61576	FKB10_MOUSE	0
DN6470_c0_g1_i7	8.81485	9.68729	10.5412	10.5227	P21333	FLNA_HUMAN	0
DN896_c0_g1_i8	7.10959	8.34363	5.65301	8.09176	Q14315	FLNC_HUMAN	0
DN896_c0_g1_i5	7.30534	8.26173	5.69783	8.26125	Q14315	FLNC_HUMAN	0
DN8026_c0_g1_i3	5.6431	6.07605	5.86146	4.85623	O61492	FLOT2_DROME	0
DN54829_c0_g2_i2	5.02386	4.44339	5.60631	6.83925	Q6A6Z2	FOLD_CUTAK	0
DN105232_c0_g2_i7	5.52816	6.62227	5.20346	5.07429	Q86XX4	FRAS1_HUMAN	0
DN5710_c0_g1_i9	7.10959	8.85365	5.65301	7.64672	Q5SZK8	FREM2_HUMAN	0
DN5710_c0_g1_i17	6.93245	8.90635	6.07136	7.90588	Q5SZK8	FREM2_HUMAN	0
DN138154_c0_g1_i2	5.55806	5.52376	6.40866	6.06605	Q6ABS5	FTHS_CUTAK	0
DN49742_c0_g4_i1	5.25126	5.85122	6.3322	7.51813	D4HA34	FTSH_PROAS	0
DN116730_c0_g2_i1	5.32811	5.59736	6.88335	6.29045	Q82K93	FTSK_STRAW	0
DN1646_c0_g1_i14	6.74068	7.89412	6.81182	6.75466	C3YWU0	FUCO_BRAFL	0
DN1646_c0_g1_i10	6.69415	7.34904	6.527	6.18317	Q6AYS4	FUCO2_RAT	0
DN179801_c0_g1_i1	6.86102	4.55971	4.16106	4.65498	P0AC33	FUMA_ECOLI	0
DN587_c0_g1_i1	7.26675	6.82496	6.79334	7.57583	P14408	FUMH_RAT	0
DN4303_c0_g1_i1	9.57691	9.12482	10.0511	9.57694	P17244	G3P_CRIGR	0
DN136713_c0_g2_i1	5.74727	6.01115	6.43318	5.79214	P16858	G3P_MOUSE	0
DN174610_c0_g1_i1	6.24916	5.23156	7.15182	7.44032	P9WN73	G6PD2_MYCTU	0
DN1446_c0_g1_i17	6.3448	7.45572	6.77461	7.65438	Q10471	GALT2_HUMAN	0
DN74663_c0_g1_i1	5.02386	5.75217	5.82265	5.72891	Q6A8P4	GATB_CUTAK	0
DN74663_c0_g3_i1	4.47008	5.44468	5.4528	5.59082	Q6A8P4	GATB_CUTAK	0
DN961_c0_g1_i7	7.85889	8.14352	8.0469	7.72881	P17343	GBB1_CAEEL	0
DN961_c0_g1_i1	5.74727	6.64293	5.60631	5.13512	P17343	GBB1_CAEEL	0
DN10790_c0_g1_i2	10.8951	10.454	11.0937	11.6751	O42249	GBLP_ORENI	0
DN407383_c0_g1_i1	4.59726	5.47171	5.74095	5.82251	Q6A9R8	GCSP_CUTAK	0
DN37282_c0_g1_i1	4.59726	5.35898	6.71681	5.88102	Q6A9R6	GCST_CUTAK	0
DN6513_c0_g1_i3	6.40488	7.61226	4.16106	5.76095	O93510	GELS_CHICK	0
DN80995_c0_g1_i1	7.18624	7.6723	8.34869	7.39517	P13020	GELS_MOUSE	0
DN50450_c0_g1_i1	6.32934	6.12261	4.16106	5.0085	P82808	GFPT1_RAT	0
DN287782_c1_g1_i1	4.47008	5.19676	6.22276	6.06605	Q6A8Q7	GLGB_CUTAK	0
DN43360_c0_g1_i1	4.16106	5.77266	4.72681	6.04126	Q47SE7	GLGB_THEFY	0
DN49062_c0_g3_i1	6.19855	6.13776	6.93467	7.57583	Q6AAD3	GLMU_CUTAK	0
DN9221_c0_g1_i1	9.22796	9.33304	8.99113	8.53754	P15103	GLNA_BOVIN	0
DN60474_c0_g1_i1	5.32811	5.32869	5.86146	5.19187	P15105	GLNA_MOUSE	0
DN96315_c0_g1_i2	4.16106	5.38837	6.67687	6.2486	Q6A9Z4	GLNE_CUTAK	0
DN972_c0_g1_i6	6.09088	5.66633	5.60631	5.79214	Q9C102	GLT1_SCHPO	0
DN399474_c0_g3_i1	5.55806	5.38837	5.50647	5.85212	Q6AAU3	GLYA_CUTAK	0
DN6237_c0_g1_i2	7.42216	7.18604	7.07809	7.662	P21279	GNAQ_MOUSE	0
DN421790_c0_g1_i1	5.16741	5.32869	6.0053	5.2452	P63093	GNAS_MESAU	0
DN45177_c0_g1_i1	7.68953	7.67719	7.43679	7.1114	P24799	GNAS_XENLA	0
DN218102_c0_g1_i6	7.44303	6.09176	9.24766	6.04126	Q8IX06	GOR_HUMAN	0
DN218102_c0_g1_i2	7.27456	5.85123	8.75529	5.96376	Q8IX06	GOR_HUMAN	0
DN483774_c0_g1_i1	4.16106	4.44339	6.0053	5.82251	P81156	GOX_PENAG	0
DN499702_c0_g1_i1	5.52816	5.44468	5.89906	5.79214	P13707	GPDA_MOUSE	0
DN28824_c0_g1_i2	5.81964	6.12261	4.56238	4.93646	P32865	GPRK1_DROME	0
DN80644_c0_g3_i3	6.1278	6.49118	5.82265	5.85212	P43249	GRK5_BOVIN	0
DN2940_c0_g1_i2	8.21293	8.13999	9.06438	8.31035	Q3ZCH0	GRP75_BOVIN	0
DN4922_c0_g1_i1	5.67005	7.00938	5.86146	6.1606	P00390	GSHR_HUMAN	0
DN20099_c0_g1_i8	7.07413	6.44446	6.77461	6.90597	Q4V7C6	GUAA_RAT	0
DN45430_c0_g2_i2	5.7719	5.99439	6.96785	5.96376	C5C7X8	GYRB_MICLC	0
DN46084_c1_g1_i1	6.28182	5.96014	5.86146	7.10012	P35886	GYRB_STRCO	0
DN8008_c0_g1_i2	13.4888	12.6566	13.4772	13.3362	Q90474	H90A1_DANRE	0
DN101710_c0_g1_i1	4.47008	9.72295	4.56238	4.51116	Q90474	H90A1_DANRE	0
DN16558_c0_g1_i6	5.90972	6.26653	7.18025	6.11421	P01899	HA11_MOUSE	0
DN16558_c0_g1_i10	5.72211	6.01115	6.83006	5.9368	P01901	HA1B_MOUSE	0
DN2583_c0_g1_i5	7.92433	7.98743	8.22609	8.22072	A6QLI6	HEM1_BOVIN	0
DN2583_c0_g1_i9	8.05135	8.18173	8.4033	8.24619	A6QLI6	HEM1_BOVIN	0
DN238011_c1_g1_i3	4.77563	5.35898	5.78252	5.2956	P04441	HG2A_MOUSE	0
DN488_c0_g1_i1	12.9335	11.9851	11.7113	12.752	Q02508	HGV2_HALRO	0
DN247025_c0_g1_i1	6.01363	5.29741	5.9709	6.11421	Q6A8L4	HIS8_CUTAK	0
DN317_c3_g1_i7	9.04859	10.8931	8.36713	9.86605	Q96RW7	HMCN1_HUMAN	0
DN6139_c0_g1_i11	6.46234	8.46397	5.04733	7.72154	D3YXG0	HMCN1_MOUSE	0
DN6139_c0_g1_i4	6.67027	8.42111	4.95619	7.55139	D3YXG0	HMCN1_MOUSE	0
DN1337_c0_g1_i6	8.5356	8.40359	8.98717	8.09738	Q7TMK9	HNRPQ_MOUSE	0
DN1337_c0_g1_i1	8.9819	8.46959	9.29966	8.54985	Q7TMK9	HNRPQ_MOUSE	0
DN313029_c0_g1_i1	5.7719	5.99439	6.40866	6.20535	Q61646	HPT_MOUSE	0
DN8008_c0_g1_i4	12.7462	11.8927	12.7422	12.5511	O57521	HS90B_DANRE	0
DN72299_c0_g2_i1	5.36433	5.90691	6.27864	6.29045	P34058	HS90B_RAT	0
DN33892_c1_g1_i1	5.99354	6.31988	6.61467	6.09036	P11144	HSP70_PLAFA	0
DN375218_c0_g1_i1	5.55806	5.88864	6.3322	5.9368	P63018	HSP7C_RAT	0
DN160_c0_g1_i7	12.9929	13.0476	14.1914	13.97	Q71U34	HSP7C_SAGOE	0
DN485556_c0_g1_i1	5.36433	5.26507	5.33615	5.43267	P51819	HSP83_IPONI	0
DN35446_c4_g1_i1	4.9696	5.90691	5.20346	5.76095	P24724	HSP90_THEPA	0
DN5848_c0_g1_i6	7.7903	8.85365	8.81015	8.56205	P42357	HUTH_HUMAN	0
DN2697_c0_g3_i1	6.91241	7.93951	7.31436	7.05407	Q8VC12	HUTU_MOUSE	0
DN21542_c0_g1_i5	5.29047	5.52376	4.56238	5.2956	Q7Z6Z7	HUWE1_HUMAN	0
DN6571_c0_g1_i1	6.5573	6.95333	4.72681	6.49937	Q7TMY8	HUWE1_MOUSE	0
DN6571_c0_g1_i14	6.77456	7.20663	4.56238	6.42716	Q7TMY8	HUWE1_MOUSE	0
DN266012_c0_g1_i1	6.16366	5.85123	6.77461	5.34345	P47879	IBP4_MOUSE	0
DN2359_c0_g1_i1	7.63633	7.10784	6.71681	7.69951	Q5R678	IDH3A_PONAB	0
DN41037_c1_g2_i2	5.52816	4.64854	6.57155	5.79214	Q6A7M5	IF2_CUTAK	0
DN41037_c1_g3_i1	5.93122	5.97738	5.86146	6.38953	Q6A7M5	IF2_CUTAK	0
DN77721_c0_g1_i4	9.44319	9.37997	9.43659	9.56286	C9WPN6	IF2H_RAT	0
DN10873_c0_g1_i9	6.39011	6.4563	6.69699	6.63303	Q5R5F5	IF4A1_PONAB	0
DN1097_c0_g1_i3	8.39753	8.10425	8.66887	8.69355	B7ZTW1	IF4A3_XENTR	0
DN352508_c0_g1_i1	4.8469	5.29741	5.74095	5.5147	Q62448	IF4G2_MOUSE	0
DN305676_c0_g2_i2	5.12227	5.32869	5.60631	5.2452	P01872	IGHM_MOUSE	0
DN7406_c0_g1_i1	5.69638	6.29348	6.3057	5.19187	Q6NV04	ILVBL_DANRE	0
DN116367_c0_g1_i1	4.91098	5.08318	6.1341	6.55106	Q6A7Z2	ILVC_CUTAK	0
DN82974_c0_g1_i1	5.32811	6.29348	5.20346	5.5147	A5CPY3	ILVD_CLAM3	0
DN4795_c0_g1_i2	8.09567	7.59167	7.83315	8.26624	P70168	IMB1_MOUSE	0
DN1591_c0_g1_i6	5.72211	6.67334	4.95619	6.72526	P06213	INSR_HUMAN	0
DN899_c0_g1_i1	8.13442	8.99464	7.54945	8.76563	P46940	IQGA1_HUMAN	0
DN233081_c0_g1_i1	5.07456	5.08318	6.77461	5.59082	Q6AA89	ISPH_CUTAK	0
DN470694_c0_g1_i1	5.29047	5.64381	6.16435	5.5147	O89051	ITM2B_MOUSE	0
DN7986_c0_g1_i6	6.51743	6.84278	6.71681	6.48168	O42287	ITSN1_XENLA	0
DN11874_c0_g1_i5	5.02386	5.92492	4.16106	5.59082	Q90Y54	JAG1B_DANRE	0
DN2157_c0_g1_i3	9.391	8.58539	8.39733	8.98073	P31321	KAP1_HUMAN	0
DN2157_c0_g1_i5	9.41907	8.61863	8.56101	9.13827	P31321	KAP1_HUMAN	0
DN11392_c0_g1_i2	7.09198	7.35519	7.93579	6.63303	P67963	KC1A_XENLA	0
DN19838_c0_g1_i5	7.36496	7.98743	8.41516	8.10297	P67963	KC1A_XENLA	0
DN19838_c0_g1_i3	7.54939	8.07131	8.46163	8.24619	P67963	KC1A_XENLA	0
DN119076_c0_g1_i3	5.46572	5.08318	5.69783	5.79214	Q6P3K7	KC1DB_DANRE	0
DN4241_c0_g1_i15	5.79601	6.37114	4.16106	5.69594	Q9NZV8	KCND2_HUMAN	0
DN4241_c0_g1_i10	5.36433	6.76069	4.95619	6.31087	Q9NZV8	KCND2_HUMAN	0
DN4241_c0_g1_i6	5.58714	6.71285	5.27216	5.88102	Q9NZV8	KCND2_HUMAN	0
DN12419_c0_g1_i3	4.69429	5.85122	4.16106	5.43267	Q9IBG7	KCP_XENLA	0
DN13953_c0_g1_i1	10.5013	9.46527	10.1623	11.0311	P05123	KCRM_CANLF	0
DN399677_c1_g1_i2	4.59726	5.52376	6.10312	5.82251	Q9X8Z9	KDPB_STRCO	0
DN447590_c0_g1_i1	4.91098	5.04157	5.82265	5.85212	Q6A8B2	KHSE_CUTAK	0
DN2408_c0_g1_i4	8.03778	7.91079	8.33627	7.59985	O15066	KIF3B_HUMAN	0
DN8933_c0_g1_i2	5.52816	8.04137	6.77461	7.22981	Q56A24	KLH24_RAT	0
DN2420_c0_g1_i7	5.55806	6.07605	5.82265	5.69594	P09346	KNOB_PLAFG	0
DN350281_c0_g2_i2	5.58714	5.32869	6.50416	4.93646	O53182	KORA_MYCTU	0
DN201032_c0_g1_i7	6.09088	6.37114	4.16106	4.93646	P05696	KPCA_RAT	0
DN17691_c0_g1_i1	8.94615	8.39476	8.82798	8.63701	P14618	KPYM_HUMAN	0
DN316105_c0_g2_i2	5.25126	5.23156	5.89906	5.0085	P52480	KPYM_MOUSE	0
DN211363_c0_g3_i1	4.47008	4.72307	4.95619	6.51682	Q89NN6	KUP1_BRADU	0
DN43_c0_g1_i2	7.99629	9.1159	7.16611	8.16839	O15230	LAMA5_HUMAN	0
DN43_c0_g1_i10	8.08252	9.14775	6.98414	7.99283	O15230	LAMA5_HUMAN	0
DN43_c0_g1_i9	8.06924	9.11411	7.07809	8.11408	O15230	LAMA5_HUMAN	0
DN43_c0_g1_i17	8.04684	9.12304	7.09315	8.09176	O15230	LAMA5_HUMAN	0
DN5529_c0_g1_i7	5.46572	7.08573	4.56238	5.85212	O15230	LAMA5_HUMAN	0
DN5529_c0_g1_i4	5.52816	7.09314	4.85179	5.96376	Q61001	LAMA5_MOUSE	0
DN5529_c0_g1_i30	5.90972	6.94513	4.56238	5.79214	Q61001	LAMA5_MOUSE	0
DN5529_c0_g1_i27	5.7719	7.08573	4.95619	5.47449	Q61001	LAMA5_MOUSE	0
DN5529_c0_g1_i3	5.67005	7.00151	4.16106	5.82251	Q61001	LAMA5_MOUSE	0
DN5529_c0_g1_i24	5.7719	7.07079	4.56238	5.59082	Q61001	LAMA5_MOUSE	0
DN5529_c0_g1_i5	5.7719	6.9034	4.56238	5.62698	Q61001	LAMA5_MOUSE	0
DN7733_c0_g1_i12	8.21694	9.11411	8.38533	8.77265	P07942	LAMB1_HUMAN	0
DN7733_c0_g1_i6	6.64597	7.33668	5.93551	6.53405	P02469	LAMB1_MOUSE	0
DN7733_c0_g1_i15	5.88783	7.04042	5.33615	6.11421	P02469	LAMB1_MOUSE	0
DN7733_c0_g1_i3	8.20081	9.13014	8.21255	8.59805	P02469	LAMB1_MOUSE	0
DN292_c0_g1_i2	9.01448	9.96846	8.29192	9.26295	P11047	LAMC1_HUMAN	0
DN447820_c0_g1_i1	5.02386	5.92492	6.0053	5.47449	P06151	LDHA_MOUSE	0
DN5006_c0_g1_i3	7.89952	8.20889	8.0469	8.18429	P48059	LIMS1_HUMAN	0
DN110070_c0_g1_i1	4.69429	5.38837	6.16435	5.66199	Q6A9X0	LIPA_CUTAK	0
DN332178_c0_g1_i1	5.99354	6.35851	7.22185	6.31087	P11152	LIPL_MOUSE	0
DN262469_c0_g1_i1	5.43304	5.85123	6.40866	5.85212	P54310	LIPS_MOUSE	0
DN113028_c0_g3_i1	6.14586	5.59736	5.74095	6.46376	B6GZD3	LIS12_PENRW	0
DN251_c0_g1_i6	14.8103	12.3944	15.198	13.6067	O00370	LORF2_HUMAN	0
DN82137_c0_g1_i3	6.49017	5.41692	7.10805	6.60084	Q6A830	LPQB_CUTAK	0
DN44849_c0_g1_i3	5.79601	5.94266	4.16106	5.2956	P50851	LRBA_HUMAN	0
DN7536_c0_g1_i25	5.58714	5.90691	4.72681	5.55343	O75581	LRP6_HUMAN	0
DN7536_c0_g1_i12	5.36433	5.87008	4.56238	6.01596	O88572	LRP6_MOUSE	0
DN252584_c0_g1_i1	5.02386	6.57998	4.16106	5.55343	O60476	MA1A2_HUMAN	0
DN31482_c0_g1_i2	7.54297	8.48632	7.6437	8.30551	D3ZHV2	MACF1_RAT	0
DN296_c0_g1_i3	10.4324	10.5135	11.1029	10.9291	P38062	MAP2_RAT	0
DN216745_c0_g1_i1	5.43304	6.34576	6.83006	7.45799	Q6A6Z5	MDH_CUTAK	0
DN10087_c0_g1_i1	5.32811	6.54737	5.39618	4.51116	P21447	MDR1A_MOUSE	0
DN2577_c0_g1_i11	8.53881	10.2782	9.13766	9.71425	O88281	MEGF6_RAT	0
DN2577_c0_g1_i6	7.00037	8.575	5.55755	7.1879	O88281	MEGF6_RAT	0
DN2577_c0_g1_i3	7.02849	8.5802	5.82265	7.31005	O88281	MEGF6_RAT	0
DN434174_c0_g1_i1	5.21031	5.38837	5.39618	5.55343	Q117R7	METE_TRIEI	0
DN364269_c0_g1_i2	5.07456	5.23156	5.60631	5.43267	Q6SYB9	METK2_TOBAC	0
DN65176_c0_g3_i1	5.16741	5.26507	7.03191	6.2486	P9WMQ5	MFD_MYCTU	0
DN104798_c0_g1_i1	7.02849	7.61736	6.73635	7.08875	O95140	MFN2_HUMAN	0
DN288406_c0_g1_i1	5.32811	4.9011	5.50647	5.55343	Q6A8Z5	MIAA_CUTAK	0
DN32716_c0_g2_i1	7.08308	7.89831	7.63353	7.25031	Q9JM52	MINK1_MOUSE	0
DN1490_c0_g2_i1	5.97312	5.66633	6.40866	5.07429	P26696	MK01_XENLA	0
DN1490_c0_g2_i3	5.7719	6.10728	6.22276	5.0085	P26696	MK01_XENLA	0
DN40345_c0_g2_i2	8.23289	5.26507	5.69783	4.16106	Q8UEM1	MNTH_AGRFC	0
DN15019_c0_g1_i2	10.0324	9.53914	9.57223	10.1477	Q8VEM8	MPCP_MOUSE	0
DN311922_c0_g1_i2	5.16741	5.49806	5.27216	5.13512	Q8VEM8	MPCP_MOUSE	0
DN42713_c0_g1_i4	5.90972	5.87008	4.16106	5.72891	Q6UR05	MRP1_CANLF	0
DN276134_c0_g1_i1	6.32934	5.49806	5.86146	4.16106	C5CBT9	MSHC_MICLC	0
DN6326_c0_g1_i5	6.9813	7.42105	7.48293	6.982	Q62599	MTA1_RAT	0
DN74339_c0_g1_i2	4.91098	5.87008	6.19389	5.85212	Q6A6J8	MURB_CUTAK	0
DN109839_c0_g1_i1	4.91098	5.59736	5.20346	5.62698	Q6A9Q1	MURC_CUTAK	0
DN2273_c0_g1_i1	8.31383	8.79896	8.89294	7.66958	Q5EAJ7	MVP_STRPU	0
DN1929_c0_g1_i5	8.56736	8.19198	7.46005	6.71031	Q9JMH9	MY18A_MOUSE	0
DN2908_c0_g1_i14	5.90972	6.62227	4.16106	5.07429	Q7Z401	MYCPP_HUMAN	0
DN2908_c0_g1_i13	5.7719	6.60129	4.16106	5.76095	Q7Z401	MYCPP_HUMAN	0
DN2908_c0_g1_i4	6.09088	6.07605	4.16106	5.82251	Q7Z401	MYCPP_HUMAN	0
DN4996_c0_g1_i9	9.28438	9.34225	8.06963	8.9563	Q9JLT0	MYH10_RAT	0
DN4996_c0_g1_i2	9.46355	9.32223	8.10672	9.1219	Q9JLT0	MYH10_RAT	0
DN19690_c0_g1_i2	7.71255	8.44698	6.48092	6.78344	E9Q634	MYO1E_MOUSE	0
DN402_c0_g1_i2	7.00981	7.14393	7.40117	6.86633	E1BPK6	MYO6_BOVIN	0
DN402_c0_g1_i13	6.89208	7.17911	6.86582	6.72526	E1BPK6	MYO6_BOVIN	0
DN402_c0_g1_i23	6.47633	6.85161	6.77461	6.37031	E1BPK6	MYO6_BOVIN	0
DN402_c0_g1_i22	6.96197	7.24692	7.19426	6.75466	E1BPK6	MYO6_BOVIN	0
DN402_c0_g1_i21	6.67027	6.77936	6.93467	6.37031	E1BPK6	MYO6_BOVIN	0
DN402_c0_g1_i18	6.97167	7.13678	7.15182	6.31087	E1BPK6	MYO6_BOVIN	0
DN402_c0_g1_i16	7.07413	7.04808	6.81182	6.63303	E1BPK6	MYO6_BOVIN	0
DN402_c0_g1_i9	6.74068	6.88635	6.88335	6.58445	Q9I8D1	MYO6_CHICK	0
DN402_c0_g1_i11	6.79669	6.69324	6.65646	6.6952	Q9I8D1	MYO6_CHICK	0
DN492712_c0_g1_i1	5.29047	4.16106	5.04733	6.46376	Q6AAI8	NAGB_CUTAK	0
DN9929_c0_g3_i1	5.67005	4.78843	5.65301	6.58445	P9WJQ3	NARG_MYCTU	0
DN327950_c0_g1_i1	5.02386	4.16106	6.07136	5.96376	P9WJQ3	NARG_MYCTU	0
DN68802_c0_g1_i1	8.77464	8.424	9.30921	8.95013	C0H906	NCBP1_SALSA	0
DN14783_c0_g1_i6	5.39927	5.35898	5.65301	4.93646	Q3SYT8	NCPR_BOVIN	0
DN11745_c0_g1_i1	7.45677	7.37949	7.85078	7.95621	P15690	NDUS1_BOVIN	0
DN351382_c0_g2_i1	7.7352	7.86875	8.36713	8.34845	Q641Y2	NDUS2_RAT	0
DN312328_c0_g1_i1	8.4496	8.21225	9.10515	8.78657	Q0MQI4	NDUV1_PONPY	0
DN45770_c0_g1_i1	5.52816	5.97738	4.72681	5.59082	P46934	NEDD4_HUMAN	0
DN166965_c0_g1_i1	4.59726	4.95099	6.69699	6.46376	Q6AB77	NHAA_CUTAK	0
DN156989_c0_g2_i1	7.1945	4.84725	4.16106	4.16106	Q3M8N0	NIFJ_ANAVT	0
DN19873_c0_g1_i18	5.88783	6.4563	4.72681	5.90923	F5HSE3	NIPLA_DANRE	0
DN407502_c0_g1_i1	5.6431	5.97738	6.0053	5.62698	P32020	NLTP_MOUSE	0
DN1552_c0_g1_i24	5.49741	6.01115	4.56238	5.19187	P46530	NOTC1_DANRE	0
DN1552_c0_g1_i15	5.32811	6.12261	4.56238	4.93646	P46530	NOTC1_DANRE	0
DN1552_c0_g1_i21	6.16366	6.74175	5.89906	6.26969	P46530	NOTC1_DANRE	0
DN1552_c0_g1_i31	6.10947	6.73219	5.78251	6.35079	Q01705	NOTC1_MOUSE	0
DN1552_c0_g1_i10	6.19855	6.77005	5.78251	6.06605	Q01705	NOTC1_MOUSE	0
DN1552_c0_g1_i30	6.03339	6.94513	5.69783	5.88102	Q01705	NOTC1_MOUSE	0
DN1552_c0_g1_i11	6.36008	6.68333	5.65301	5.82251	A2RUV0	NOTC1_XENTR	0
DN1552_c0_g1_i26	6.1278	6.55833	5.69783	6.38953	A2RUV0	NOTC1_XENTR	0
DN1552_c0_g1_i4	6.31369	6.70308	5.93551	6.1606	A2RUV0	NOTC1_XENTR	0
DN1552_c0_g1_i13	5.90972	6.8339	5.50647	6.09036	Q04721	NOTC2_HUMAN	0
DN1552_c0_g1_i28	6.03339	6.76069	5.33615	6.33098	Q04721	NOTC2_HUMAN	0
DN1552_c0_g1_i17	6.21564	6.71285	5.89906	6.26969	Q04721	NOTC2_HUMAN	0
DN71192_c0_g2_i1	5.02386	5.49806	6.07136	7.2805	Q6A5T5	NPD_CUTAK	0
DN332254_c1_g3_i3	5.88783	5.12275	5.12901	5.13512	Q61937	NPM_MOUSE	0
DN411570_c0_g1_i1	6.07201	5.52376	5.65301	6.33099	Q9XD73	NRDJ_STRCT	0
DN14813_c0_g1_i1	6.39011	6.35851	5.89906	6.11421	O88491	NSD1_MOUSE	0
DN5102_c0_g1_i9	9.31085	9.23104	10.8906	9.72513	Q6QU67	NU5M_ASPNG	0
DN408338_c0_g1_i1	4.59726	5.19676	5.50647	6.06605	Q9XAQ9	NUOF_STRCO	0
DN149154_c1_g1_i1	5.02386	5.47171	6.77461	6.76912	Q6A6H1	NUON_CUTAK	0
DN241933_c0_g2_i1	5.02386	6.09176	4.56238	5.47449	Q6A6H1	NUON_CUTAK	0
DN17007_c0_g1_i4	6.82923	6.53632	5.04733	5.19187	Q5RCB8	ODO1_PONAB	0
DN338540_c0_g4_i3	5.21031	5.52376	6.1341	4.85623	A0R0B0	ODP1_MYCS2	0
DN7798_c0_g1_i3	9.61986	9.29563	9.57223	9.71607	P49432	ODPB_RAT	0
DN5716_c0_g1_i6	8.33983	8.75135	8.39733	8.31035	O15294	OGT1_HUMAN	0
DN5716_c0_g1_i8	8.4359	8.8472	8.27249	8.4483	O15294	OGT1_HUMAN	0
DN5716_c0_g1_i4	8.39044	8.67076	8.31109	8.46573	O15294	OGT1_HUMAN	0
DN18250_c0_g1_i1	7.02849	7.18604	7.04748	7.1879	Q5ZM25	OLA1_CHICK	0
DN8504_c1_g3_i1	5.32811	4.99765	5.20346	5.79214	P21187	PABP_DROME	0
DN3594_c0_g2_i1	11.0717	10.9256	10.8256	10.693	Q5R8F7	PABP1_PONAB	0
DN332178_c1_g2_i3	5.95235	6.28008	6.67687	6.04126	Q9Z2V4	PCKGC_MOUSE	0
DN2897_c0_g1_i1	6.44821	7.6723	7.87682	7.34852	P41413	PCSK5_RAT	0
DN2897_c0_g1_i8	6.1278	7.63256	7.92752	7.1985	P41413	PCSK5_RAT	0
DN2897_c0_g1_i6	6.43392	7.77619	7.96843	7.1985	P41413	PCSK5_RAT	0
DN183118_c0_g1_i1	7.00037	7.53345	7.56023	6.40848	Q8WUM4	PDC6I_HUMAN	0
DN1308_c0_g1_i1	11.5814	12.0934	11.8479	12.1286	Q5R5B6	PDIA1_PONAB	0
DN5499_c0_g1_i1	7.67201	8.49737	7.51658	8.27616	P08003	PDIA4_MOUSE	0
DN49440_c0_g1_i2	5.69638	5.99439	7.69348	6.81163	A0A0C5URS1	PEPCK_PROFF	0
DN8860_c0_g1_i1	8.42554	8.44127	8.56633	8.0344	Q11136	PEPD_MOUSE	0
DN645_c0_g1_i12	7.13561	8.52731	5.4528	6.61703	Q05793	PGBM_MOUSE	0
DN2778_c0_g1_i2	9.00525	8.73512	9.08676	9.02836	P00559	PGK1_HORSE	0
DN486406_c0_g1_i1	4.8469	5.57338	5.86146	5.2956	P28654	PGS2_MOUSE	0
DN11543_c1_g1_i1	5.25126	5.62083	5.20346	4.93646	P21303	PK66_PLAKU	0
DN2850_c0_g1_i2	9.32204	10.7921	7.53858	9.76431	Q9JI55	PLEC_CRIGR	0
DN500539_c0_g1_i1	5.02386	5.38837	6.22276	5.38905	Q8CGN5	PLIN1_MOUSE	0
DN332907_c0_g1_i1	5.21031	5.41692	5.78252	5.43267	O88492	PLIN4_MOUSE	0
DN25936_c0_g2_i2	7.10959	7.78978	7.54945	7.17723	Q9R0E1	PLOD3_MOUSE	0
DN481076_c0_g1_i1	5.7719	5.8126	6.43318	5.69594	Q8BJ56	PLPL2_MOUSE	0
DN2105_c0_g1_i2	8.57363	8.46115	8.59266	8.1948	A7E3Q8	PLST_BOVIN	0
DN230_c0_g1_i5	5.21031	4.84725	10.8355	12.696	P29150	POL1_TORVR	0
DN30131_c0_g1_i1	5.95235	6.30675	4.16106	5.55343	P62138	PP1A_RAT	0
DN20376_c0_g1_i1	6.21564	5.97738	5.129	5.82251	Q9UMS4	PRP19_HUMAN	0
DN1509_c0_g1_i3	9.73877	10.394	10.4493	10.4261	Q13523	PRP4B_HUMAN	0
DN1509_c0_g1_i1	9.75675	10.3377	10.214	10.5677	Q13523	PRP4B_HUMAN	0
DN53901_c0_g1_i4	6.1278	7.06326	7.66382	7.05407	Q2KJJ0	PRP6_BOVIN	0
DN2514_c0_g1_i5	7.02849	8.22894	8.08458	8.27121	Q99PV0	PRP8_MOUSE	0
DN31034_c0_g1_i1	5.21031	6.0277	4.16106	5.90923	Q99PV0	PRP8_MOUSE	0
DN8762_c0_g1_i1	5.81964	6.65314	6.84805	6.89288	Q7ZXC9	PRPS2_XENLA	0
DN14087_c0_g1_i6	6.50387	6.74175	7.03191	7.91227	P62334	PRS10_MOUSE	0
DN10667_c0_g1_i1	8.95817	9.22276	8.8759	8.64085	P48601	PRS4_DROME	0
DN10667_c0_g1_i2	8.90204	9.2556	8.74125	8.35782	P48601	PRS4_DROME	0
DN1660_c0_g1_i1	8.55474	8.61357	8.91396	8.51679	P17980	PRS6A_HUMAN	0
DN1088_c0_g1_i1	7.7575	7.6723	7.85951	8.49997	Q63570	PRS6B_RAT	0
DN1088_c0_g1_i3	7.49055	7.13678	6.91777	8.01673	Q63570	PRS6B_RAT	0
DN80409_c0_g1_i3	6.60868	6.45629	6.91777	6.61703	F6P3G4	PS11A_DANRE	0
DN250133_c0_g1_i1	5.12227	4.16106	5.9709	8.61376	P11848	PSBA_SINAL	0
DN3384_c0_g1_i2	9.02594	8.36792	7.6437	8.33902	O88761	PSMD1_RAT	0
DN10887_c0_g1_i2	8.60762	8.79896	9.54288	8.6599	Q2KJ46	PSMD3_BOVIN	0
DN43358_c0_g1_i1	7.10081	7.4327	7.68366	7.35797	Q15008	PSMD6_HUMAN	0
DN54766_c0_g1_i1	5.79601	6.44446	6.19389	6.38953	Q9KKQ7	PTM3C_VIBCH	0
DN6055_c0_g2_i1	5.95235	6.04403	4.95619	6.37031	Q64487	PTPRD_MOUSE	0
DN103365_c0_g1_i1	4.59726	5.35898	6.03877	6.31087	Q6A6A3	PURA_CUTAK	0
DN266024_c0_g1_i1	4.91098	4.99765	5.39618	6.76912	Q6A6C0	PURL_CUTAK	0
DN4955_c0_g1_i1	5.69638	6.68333	5.60631	5.88102	Q3UQ28	PXDN_MOUSE	0
DN4955_c0_g1_i10	5.74727	6.8339	5.69783	5.76095	Q3UQ28	PXDN_MOUSE	0
DN254418_c0_g1_i1	5.61547	5.6884	6.61467	7.13369	Q6AB26	PXPA_CUTAK	0
DN304988_c0_g1_i1	5.32811	5.49806	5.65301	5.2956	Q05920	PYC_MOUSE	0
DN30876_c0_g3_i2	5.21031	4.72307	6.84805	6.87967	Q6A7X4	PYRG_CUTAK	0
DN38155_c0_g2_i2	6.54414	6.47965	4.85179	6.1606	A0A0R4IBK5	R213A_DANRE	0
DN9137_c0_g1_i1	7.32048	7.84725	8.06963	7.662	Q32LP2	RADI_BOVIN	0
DN183963_c0_g1_i2	7.87426	4.64854	7.26225	5.2452	P37624	RBBA_ECOLI	0
DN17237_c0_g1_i2	7.25891	6.59068	7.50545	7.12259	Q8BHS3	RBM22_MOUSE	0
DN5991_c0_g1_i4	5.32811	6.73219	5.20346	7.45799	Q9YQ08	RDRP_TMVB	0
DN3061_c0_g1_i6	5.58714	6.0277	5.33615	7.2401	P30738	RDRP_TMVKR	0
DN133104_c0_g1_i3	5.72211	5.08318	6.88335	6.56786	Q6ABL2	RECF_CUTAK	0
DN353327_c0_g1_i1	5.95235	4.16106	6.38366	6.51682	Q6A969	RECO_CUTAK	0
DN395_c0_g1_i5	7.13561	6.67334	6.45727	7.90588	P31350	RIR2_HUMAN	0
DN49332_c0_g1_i5	11.5453	11.7153	11.8961	12.2214	P39023	RL3_HUMAN	0
DN49332_c0_g1_i4	11.5033	11.6362	11.7119	12.0811	P39023	RL3_HUMAN	0
DN336841_c0_g1_i1	5.25126	5.29741	6.0053	5.19187	P27659	RL3_MOUSE	0
DN146140_c0_g1_i1	5.07456	5.59736	6.27864	5.2956	Q9D8E6	RL4_MOUSE	0
DN8051_c0_g1_i1	13.1987	13.4255	13.9495	14.0168	P02385	RL4B_XENLA	0
DN407608_c0_g1_i1	5.07456	5.23156	5.78252	5.19187	P47962	RL5_MOUSE	0
DN315559_c0_g1_i4	13.3265	13.653	13.6792	13.8844	Q26481	RL5_STYCL	0
DN225266_c0_g2_i1	5.43304	5.62083	6.1341	5.72891	P47911	RL6_MOUSE	0
DN318685_c0_g1_i1	5.39928	5.41692	5.82265	5.13512	P14148	RL7_MOUSE	0
DN275478_c0_g1_i1	5.25126	4.95099	5.9709	5.5147	P62919	RL8_RAT	0
DN129333_c0_g1_i4	5.12227	5.7313	6.16435	5.55343	P14869	RLA0_MOUSE	0
DN76260_c0_g3_i1	5.46572	5.29741	5.55755	5.38905	Q6A7K4	RLMN_CUTAK	0
DN4706_c1_g3_i1	8.2089	7.7486	9.68891	8.42175	P47907	RMS5_PENUR	0
DN239981_c0_g1_i1	5.16741	5.49806	5.60631	4.93646	Q6URK4	ROA3_RAT	0
DN18437_c0_g1_i5	5.29047	5.96014	4.16106	5.43267	O75116	ROCK2_HUMAN	0
DN18437_c0_g1_i3	4.9696	5.94266	4.56238	5.2452	P70336	ROCK2_MOUSE	0
DN5998_c0_g1_i1	8.16385	8.87919	8.6934	8.35782	P04052	RPB1_DROME	0
DN1694_c0_g1_i3	7.40098	8.00693	7.43679	7.52652	P30876	RPB2_HUMAN	0
DN28189_c0_g1_i1	7.37224	7.54422	7.56023	7.10012	Q9NW08	RPC2_HUMAN	0
DN15141_c0_g1_i1	9.12518	8.90012	9.36823	9.99142	E2RQ08	RPN1_CANLF	0
DN73993_c0_g3_i2	5.72211	5.16055	5.04733	5.62698	Q6A6K6	RPOB_CUTAK	0
DN211006_c0_g1_i2	5.32811	4.44339	5.89906	6.18317	Q6A6K7	RPOC_CUTAK	0
DN60503_c0_g3_i1	5.07456	5.6884	6.19389	6.04126	Q6A7J7	RS2_CUTAK	0
DN416030_c0_g1_i1	5.25126	5.66633	6.19389	5.5147	P27952	RS2_RAT	0
DN335822_c0_g1_i2	5.36433	5.44468	5.74095	5.47449	P97351	RS3A_MOUSE	0
DN178_c0_g1_i1	4.9696	5.47171	5.60631	5.38906	P79103	RS4_BOVIN	0
DN432016_c0_g1_i2	5.02386	5.38837	5.93551	5.47449	P62755	RS6_RAT	0
DN96579_c0_g1_i1	4.8469	5.23156	6.75561	6.31087	Q6A9R0	RSMH_CUTAK	0
DN56714_c0_g1_i2	5.29047	5.38837	6.527	5.43267	P14206	RSSA_MOUSE	0
DN26182_c0_g1_i2	6.69415	6.91185	7.6538	7.39517	Q6NZS4	RTCB_DANRE	0
DN158386_c0_g1_i1	4.16106	5.29741	5.9709	6.44559	Q6A8K7	RUVB_CUTAK	0
DN8653_c0_g1_i3	6.80762	6.66328	6.67687	7.12259	Q9DE26	RUVB1_XENLA	0
DN1106_c0_g1_i6	9.07972	8.46115	8.36101	9.88718	Q8NBS3	S4A11_HUMAN	0
DN5203_c0_g1_i5	7.12699	6.13776	5.50647	7.00644	P31649	S6A13_MOUSE	0
DN39715_c0_g1_i5	6.09088	7.97163	7.93579	7.06573	P31649	S6A13_MOUSE	0
DN39715_c0_g1_i16	6.23251	8.20215	7.76037	7.00644	P31646	S6A13_RAT	0
DN8582_c0_g1_i1	8.36897	9.40799	9.18337	9.28026	Q9UN76	S6A14_HUMAN	0
DN6220_c0_g1_i1	8.92181	8.96911	9.51566	8.92518	P27604	SAHH_CAEEL	0
DN327449_c0_g1_i1	5.81964	5.16055	4.16106	5.2956	Q96HN2	SAHH3_HUMAN	0
DN84516_c0_g1_i5	5.61547	5.75217	6.48092	5.69594	Q61207	SAP_MOUSE	0
DN158_c0_g1_i3	7.7575	7.62751	7.98447	8.10297	Q569D5	SBP1_XENTR	0
DN4543_c0_g3_i1	6.14586	6.52517	6.1341	6.18317	Q01405	SC23A_MOUSE	0
DN4543_c0_g3_i2	6.39011	6.49118	6.61467	6.51682	Q01405	SC23A_MOUSE	0
DN1161_c0_g1_i8	7.51044	9.58637	10.2753	9.86278	P53791	SC5A1_SHEEP	0
DN5324_c0_g1_i4	5.02386	7.22692	6.0053	5.85212	Q8N695	SC5A8_HUMAN	0
DN4971_c0_g1_i2	9.55177	9.752	9.41907	9.50725	Q25147	SC61A_HALRO	0
DN40438_c0_g1_i1	5.52816	5.54886	4.16106	4.76453	Q9UTJ7	SDHA_SCHPO	0
DN39234_c1_g1_i2	5.69638	5.04158	5.27216	5.59082	Q6A833	SECA_CUTAK	0
DN243545_c0_g2_i1	5.7719	6.01115	6.91777	6.76912	Q6A833	SECA_CUTAK	0
DN10823_c0_g1_i4	7.76852	7.99135	7.87682	8.16839	Q63ZQ1	SEP2B_XENLA	0
DN136_c0_g1_i11	8.98894	8.88129	8.37322	7.48408	Q5R481	SEPT7_PONAB	0
DN236866_c0_g1_i2	8.19675	8.0897	8.36101	7.71423	B1H120	SEPT8_XENTR	0
DN8781_c0_g1_i9	5.84281	6.09177	4.95619	5.2956	Q5RBI5	SF3B3_PONAB	0
DN8781_c0_g2_i4	4.91098	5.88864	4.16106	5.9368	Q5RBI5	SF3B3_PONAB	0
DN127103_c0_g1_i1	4.69429	6.10728	5.33615	5.76095	P77951	SIGA_STRGR	0
DN57948_c0_g1_i4	4.91098	5.94266	4.16106	4.85623	Q9WVB4	SLIT3_MOUSE	0
DN2478_c0_g1_i1	8.98425	9.33919	9.60359	9.2123	Q80ZG5	SLU7_RAT	0
DN1549_c0_g1_i1	7.77945	8.19877	8.21933	7.93754	Q1JQA2	SMAD1_BOVIN	0
DN55629_c0_g1_i4	6.60868	7.17911	6.67687	6.83925	Q13485	SMAD4_HUMAN	0
DN5971_c0_g1_i2	6.37518	6.4563	5.82265	5.34345	Q14683	SMC1A_HUMAN	0
DN81345_c0_g1_i6	6.05285	6.42047	5.12901	6.58445	O93309	SMC3_XENLA	0
DN2154_c0_g1_i5	8.60762	9.16514	8.52318	8.00483	P51532	SMCA4_HUMAN	0
DN9482_c0_g1_i9	10.8963	10.4799	11.2871	10.3309	Q8TAQ2	SMRC2_HUMAN	0
DN5045_c0_g1_i3	5.55806	6.9034	7.61297	7.44918	Q61466	SMRD1_MOUSE	0
DN5045_c0_g1_i1	5.52816	6.74175	7.751	7.17723	Q61466	SMRD1_MOUSE	0
DN4702_c0_g1_i2	6.3448	6.34576	7.37691	7.47544	Q5U379	SNF5_DANRE	0
DN5762_c0_g1_i1	8.31383	8.12936	8.62363	8.6599	Q5R7R9	SNW1_PONAB	0
DN371713_c0_g2_i1	5.29047	6.04403	5.82265	5.90923	P07759	SPA3K_MOUSE	0
DN5611_c0_g1_i9	7.53005	9.23763	8.64392	8.6293	Q9W770	SPON1_CHICK	0
DN355896_c2_g1_i1	5.43304	6.13776	6.50416	5.9368	P07214	SPRC_MOUSE	0
DN171804_c0_g1_i1	7.15269	7.72046	7.41314	7.662	Q8UVK2	SPT6H_DANRE	0
DN9468_c0_g1_i4	7.01918	8.28743	4.16106	7.52652	Q01082	SPTB2_HUMAN	0
DN5413_c0_g1_i3	6.46234	6.50261	5.55755	5.99014	Q3B7D2	SPTC2_RAT	0
DN11018_c0_g1_i1	6.29786	7.02499	4.72681	6.01596	P16546	SPTN1_MOUSE	0
DN1444_c0_g1_i8	6.96197	7.77619	6.83006	8.20002	P16086	SPTN1_RAT	0
DN5534_c0_g1_i5	8.1087	7.47274	7.06287	6.44559	Q60598	SRC8_MOUSE	0
DN5788_c0_g1_i4	7.08308	7.59167	7.07809	6.22716	O54781	SRPK2_MOUSE	0
DN18164_c0_g1_i4	5.32811	6.55833	5.78251	5.79214	P42232	STA5B_MOUSE	0
DN2914_c0_g1_i8	5.93122	6.52517	5.129	5.2956	F1NBT0	STK10_CHICK	0
DN8401_c0_g1_i4	5.32811	5.97738	6.22276	4.16106	P61765	STXB1_RAT	0
DN3264_c0_g1_i1	8.429	7.13678	7.62329	7.87349	Q148D5	SUCB1_BOVIN	0
DN6409_c0_g1_i1	7.67788	7.84725	8.01603	7.89946	P53590	SUCB2_PIG	0
DN42408_c0_g1_i2	5.93122	6.12261	7.00025	6.94451	Q6A6Y0	SUCC_CUTAK	0
DN406606_c0_g1_i2	5.12227	5.59736	6.93467	6.6952	Q6A8I8	SYA_CUTAK	0
DN6085_c0_g1_i3	7.00037	7.71572	7.26225	6.67993	Q922B2	SYDC_MOUSE	0
DN41527_c0_g1_i6	5.84281	6.25285	5.04733	5.66199	Q8CGC7	SYEP_MOUSE	0
DN501297_c0_g1_i1	5.39928	5.44468	5.89906	5.2956	Q6A7V5	SYFA_CUTAK	0
DN431811_c0_g1_i1	4.47008	5.44468	5.93551	6.29045	Q6A7V6	SYFB_CUTAK	0
DN212498_c0_g1_i2	6.51743	4.78843	5.39618	5.2452	Q3J5M6	SYFB_RHOS4	0
DN59403_c0_g1_i2	5.69638	5.44468	5.20346	5.43267	A1TBP9	SYG_MYCVP	0
DN66786_c0_g1_i1	4.9696	5.57338	4.56238	5.90923	Q6AB89	SYI_CUTAK	0
DN83910_c0_g1_i2	4.9696	5.7313	4.56238	6.22716	Q6AB89	SYI_CUTAK	0
DN211557_c0_g1_i1	5.58714	4.64854	5.69783	5.69594	Q6AB89	SYI_CUTAK	0
DN351479_c0_g1_i1	5.16741	4.9011	5.93551	6.35079	Q6A707	SYM_CUTAK	0
DN147939_c0_g1_i1	5.02386	5.29741	5.78252	5.34345	Q6A7L9	SYP_CUTAK	0
DN194290_c0_g1_i1	6.80762	5.12275	5.04733	5.13512	A1B1L0	SYP_PARDP	0
DN34184_c0_g2_i2	5.12227	5.97738	6.0053	5.85212	Q6A5X8	SYR_CUTAK	0
DN60256_c0_g1_i2	5.61548	5.44468	6.91777	6.06605	Q6A5P0	SYS_CUTAK	0
DN14955_c0_g1_i1	4.9696	6.8069	4.56238	4.16106	Q6DRC0	SYSC_DANRE	0
DN1779_c0_g1_i1	7.7352	7.85589	7.51658	7.29042	P49696	SYVC_TAKRU	0
DN14990_c0_g2_i1	6.36008	5.71006	5.74095	5.34345	Q5ZJ08	SYYC_CHICK	0
DN534_c0_g1_i28	6.50387	6.71285	4.72681	5.90923	O88664	TAOK1_RAT	0
DN534_c0_g1_i13	8.76372	9.23434	7.92752	7.72881	O88664	TAOK1_RAT	0
DN408422_c0_g1_i1	5.39928	5.59736	5.65301	5.47449	P14642	TBA_PLAFK	0
DN271_c0_g1_i7	13.2514	12.3198	12.3277	11.8582	P68370	TBA1A_RAT	0
DN57274_c0_g1_i3	5.86553	5.92492	6.57155	5.79214	Q6P9V9	TBA1B_RAT	0
DN271_c0_g1_i1	11.1929	11.026	11.4185	11.5964	P18288	TBAT_ONCMY	0
DN345_c0_g1_i2	10.2325	8.75825	8.39733	9.9839	P18288	TBAT_ONCMY	0
DN345_c0_g1_i4	10.2035	8.81228	8.17115	10.0942	P18288	TBAT_ONCMY	0
DN345_c0_g1_i3	10.6186	9.7358	9.8501	11.094	P18288	TBAT_ONCMY	0
DN1854_c0_g1_i5	11.885	12.0011	11.8484	12.5751	P11833	TBB_PARLI	0
DN12164_c0_g1_i3	10.8857	9.81613	8.59787	8.14149	P11833	TBB_PARLI	0
DN12164_c0_g1_i4	9.3533	8.71162	9.23436	9.72332	P02554	TBB_PIG	0
DN12164_c0_g1_i5	10.7576	9.71824	8.81015	8.6599	P30883	TBB4_XENLA	0
DN12164_c0_g1_i7	10.2462	9.96151	9.43659	10.3273	P30883	TBB4_XENLA	0
DN7311_c0_g1_i1	9.01448	8.29695	8.8887	8.74439	Q9W790	TCPA_PALPA	0
DN582_c0_g1_i10	7.20272	6.8339	6.73635	6.982	Q3ZBH0	TCPB_BOVIN	0
DN104105_c0_g1_i2	10.7037	9.49307	9.49908	10.3285	P80315	TCPD_MOUSE	0
DN61677_c0_g1_i4	9.64978	9.13014	9.34057	9.58094	Q4R6V2	TCPE_MACFA	0
DN9235_c0_g1_i2	8.06479	7.66739	8.0082	7.98073	P80313	TCPH_MOUSE	0
DN5961_c0_g1_i1	8.2408	8.13646	8.56101	8.82756	Q6EE31	TCPQ_CHICK	0
DN17220_c0_g1_i3	7.38668	7.56021	7.96843	7.93127	P80317	TCPZ_MOUSE	0
DN1506_c0_g1_i9	7.82765	7.46141	8.37322	7.96238	Q8CGF7	TCRG1_MOUSE	0
DN1417_c0_g1_i1	9.83175	9.752	9.79684	9.91752	P23787	TERA_XENLA	0
DN2244_c0_g1_i1	7.85373	8.32514	7.6437	8.47437	Q8BWT1	THIM_MOUSE	0
DN105820_c1_g2_i1	7.29003	5.04157	5.04733	5.2452	A1B0F4	TIG_PARDP	0
DN80523_c0_g1_i1	5.07456	5.26507	6.07136	6.29045	Q6AB49	TILS_CUTAK	0
DN15229_c0_g1_i1	8.14711	8.16795	8.03155	7.90588	P29401	TKT_HUMAN	0
DN434508_c0_g1_i1	5.21031	5.6884	6.07136	5.55343	P40142	TKT_MOUSE	0
DN25146_c0_g1_i1	5.29047	7.09314	4.16106	5.47449	O43897	TLL1_HUMAN	0
DN8114_c0_g1_i2	7.07413	7.77163	4.56238	6.64884	Q9Y490	TLN1_HUMAN	0
DN3137_c0_g1_i7	6.69415	6.74175	4.16106	5.90923	P26039	TLN1_MOUSE	0
DN5026_c0_g1_i4	5.84281	6.46803	4.72681	5.38906	Q9Y4G6	TLN2_HUMAN	0
DN5026_c0_g1_i14	5.97312	6.04403	5.20346	5.38906	Q9Y4G6	TLN2_HUMAN	0
DN5026_c0_g1_i6	5.6431	6.04403	5.20346	5.34345	Q9Y4G6	TLN2_HUMAN	0
DN5026_c0_g1_i17	5.74727	5.99439	4.72681	5.0085	Q9Y4G6	TLN2_HUMAN	0
DN37344_c0_g1_i3	5.99354	6.96147	5.4528	4.16106	Q5R8Y6	TM9S2_PONAB	0
DN7812_c0_g1_i7	7.7957	7.33668	7.13738	6.85286	P83510	TNIK_MOUSE	0
DN263501_c0_g1_i4	5.58714	5.71006	5.55755	6.71031	P06694	TNP2_ECOLX	0
DN13013_c0_g1_i4	9.21401	7.34287	5.82265	7.03046	P13694	TNP7_ECOLX	0
DN44763_c2_g1_i1	5.32811	5.26507	5.65301	6.55106	P13694	TNP7_ECOLX	0
DN384364_c0_g1_i1	5.97311	4.95099	6.0053	6.01596	P13694	TNP7_ECOLX	0
DN1662_c0_g1_i2	8.33614	8.1258	8.29192	8.52927	O94826	TOM70_HUMAN	0
DN1882_c0_g1_i7	8.82539	8.60338	8.63887	8.56609	P41512	TOP1_XENLA	0
DN431983_c0_g1_i1	5.12227	5.49806	5.69783	5.2452	P17751	TPIS_MOUSE	0
DN166563_c0_g3_i1	6.60868	6.82496	6.91777	6.35079	Q04222	TRA1_COMTE	0
DN8674_c0_g2_i8	8.73607	4.16106	4.16106	4.16106	P60230	TRA1_MYCTU	0
DN10329_c0_g1_i14	9.00293	4.44339	4.72681	4.76453	P60230	TRA1_MYCTU	0
DN23496_c0_g1_i6	7.44991	7.29891	7.31436	7.339	P60230	TRA1_MYCTU	0
DN6126_c0_g1_i2	9.32946	5.83207	6.10312	5.47449	Q46087	TRAT_AMIAI	0
DN6126_c1_g1_i13	9.78128	5.8126	6.3322	6.66447	Q46087	TRAT_AMIAI	0
DN389989_c0_g1_i2	6.43392	6.88635	7.03191	6.40848	Q921I1	TRFE_MOUSE	0
DN76576_c0_g1_i2	6.21564	6.28008	7.80629	5.76095	Q9RDE2	TRI1_STRCO	0
DN106156_c0_g2_i1	5.39928	5.47171	6.71681	7.21945	Q6AF67	TRPB_LEIXX	0
DN3904_c0_g1_i9	7.7575	8.17141	7.59211	7.59189	O62768	TRXR1_BOVIN	0
DN67230_c1_g1_i2	5.67005	6.68333	5.129	5.2956	P91938	TRXR1_DROME	0
DN265_c0_g1_i23	6.23251	9.73464	8.41516	8.95013	P35448	TSP1_XENLA	0
DN75307_c0_g1_i1	5.4974	5.57338	6.27864	5.5147	Q8BG60	TXNIP_MOUSE	0
DN87483_c0_g1_i2	5.46572	5.52376	5.86146	7.15563	Q6A761	TYSY_CUTAK	0
DN282439_c0_g1_i2	6.83991	5.08318	8.62873	6.35079	D6RBQ6	U17LH_HUMAN	0
DN6575_c0_g1_i4	8.56106	9.1495	9.26084	8.79003	P26369	U2AF2_MOUSE	0
DN6142_c0_g1_i1	8.27586	8.33441	8.33627	7.86033	O75643	U520_HUMAN	0
DN106630_c0_g1_i1	5.74727	5.16055	5.12901	5.38905	O75643	U520_HUMAN	0
DN106630_c0_g1_i2	5.69638	5.16055	5.20346	5.5147	O75643	U520_HUMAN	0
DN3430_c0_g1_i1	7.20272	6.9936	7.50545	7.1447	Q5F3X4	U5S1_CHICK	0
DN5046_c0_g1_i2	8.86678	9.39331	9.2739	9.25796	Q29504	UBA1_RABIT	0
DN122_c0_g1_i8	10.4889	10.9205	11.6343	11.2539	P0CG71	UBIQ1_CAEEL	0
DN122_c0_g1_i3	10.3601	10.8121	11.5164	11.0557	P0CG71	UBIQ1_CAEEL	0
DN10991_c0_g1_i5	6.3448	7.90248	7.20812	7.21945	Q96K76	UBP47_HUMAN	0
DN182321_c0_g1_i1	4.47008	5.16055	6.0053	5.82251	O33952	UDG8_ECOLX	0
DN176604_c0_g2_i1	6.89208	4.84725	5.12901	5.43267	Q3J154	URE1_RHOS4	0
DN347786_c0_g1_i7	5.86553	6.12261	4.56238	5.62698	P70398	USP9X_MOUSE	0
DN9838_c0_g1_i4	6.49017	6.65314	6.77461	6.90597	O00507	USP9Y_HUMAN	0
DN81563_c0_g1_i3	5.93122	6.33289	4.16106	5.2956	O00507	USP9Y_HUMAN	0
DN179106_c0_g1_i2	5.72211	5.77266	6.79334	7.1985	Q6A5D0	UXAC_CUTAK	0
DN5742_c0_g1_i3	7.83814	7.68207	7.74158	8.28109	Q8BVE3	VATH_MOUSE	0
DN4098_c0_g1_i5	7.90451	8.74442	7.99243	8.02854	Q00341	VIGLN_HUMAN	0
DN4098_c0_g1_i6	8.43934	9.30036	7.90239	8.34845	Q00341	VIGLN_HUMAN	0
DN231238_c3_g1_i1	4.9696	5.59736	6.0053	5.76095	P20152	VIME_MOUSE	0
DN8055_c0_g1_i5	7.28232	7.72047	7.26225	8.02854	Q64727	VINC_MOUSE	0
DN23946_c0_g1_i1	9.0305	9.36048	7.18025	7.61565	Q96RL7	VP13A_HUMAN	0
DN26142_c0_g1_i5	7.27456	7.24029	4.16106	6.20535	Q709C8	VP13C_HUMAN	0
DN26142_c0_g1_i1	8.92427	8.93706	8.25278	8.83427	Q709C8	VP13C_HUMAN	0
DN9034_c0_g1_i3	5.90972	5.87008	4.72681	5.13512	P25286	VPP1_RAT	0
DN425355_c0_g1_i1	5.43304	5.54886	5.4528	5.2956	P21614	VTDB_MOUSE	0
DN8160_c0_g1_i1	6.28182	8.82766	5.55755	7.1114	Q8CIZ8	VWF_MOUSE	0
DN179025_c0_g1_i2	7.7903	7.59167	7.09316	6.11421	Q8K4P0	WDR33_MOUSE	0
DN6986_c0_g1_i1	6.32934	6.50261	7.37691	6.58445	Q498M4	WDR5_RAT	0
DN6986_c0_g1_i2	6.41948	6.21089	7.66382	6.91894	Q498M4	WDR5_RAT	0
DN53613_c0_g1_i1	4.59726	6.23901	4.16106	5.38906	Q9H0M0	WWP1_HUMAN	0
DN2537_c0_g1_i12	6.36008	6.72256	6.16435	5.72891	P47990	XDH_CHICK	0
DN19111_c0_g1_i17	5.86553	6.26653	4.72681	5.19187	O14980	XPO1_HUMAN	0
DN3388_c0_g1_i4	6.75206	6.7886	5.4528	5.38906	Q6P5F9	XPO1_MOUSE	0
DN16219_c0_g1_i5	5.58714	5.83207	5.60631	4.16106	Q9H0D6	XRN2_HUMAN	0
DN301138_c0_g2_i2	5.16741	4.84725	4.72681	6.04126	Q53201	Y4UI_SINFN	0
DN301138_c0_g2_i1	5.29047	5.04157	5.04733	5.82251	Q53201	Y4UI_SINFN	0
DN76896_c0_g2_i2	6.24916	6.57998	5.93551	5.2452	B1VFF9	Y538_CORU7	0
DN132190_c0_g3_i1	10.8155	5.32869	5.50647	5.72891	P55189	YBAR_BACSU	0
DN15516_c0_g1_i1	5.74727	6.37114	6.43318	6.1606	P77316	YBDR_ECOLI	0
DN56396_c0_g2_i1	6.71761	4.84725	4.72681	4.16106	A1B0E4	YIDC_PARDP	0
DN21368_c1_g1_i1	4.8469	4.16106	5.74095	6.55106	Q6A7F4	SYV_CUTAK	1.29e-180
DN145619_c0_g1_i2	6.01363	6.16751	6.38366	4.16106	P9WQ91	AAT_MYCTU	1.34e-180
DN19064_c0_g2_i1	5.61548	5.04158	5.82265	5.2956	P0CY96	CH60_CUTAC	1.8e-180
DN288_c0_g1_i2	9.7595	10.343	10.0811	10.2187	Q8JG64	PDIA3_CHICK	2.56e-180
DN7402_c0_g1_i2	6.51743	7.75323	4.72681	5.69594	P78509	RELN_HUMAN	2.92e-180
DN221076_c0_g2_i1	5.4974	6.22503	5.89906	5.47449	E3PY95	OAME_ACESD	3.15e-180
DN313344_c0_g1_i1	5.43304	6.04403	6.19389	5.72891	P05064	ALDOA_MOUSE	4.1e-180
DN8525_c0_g1_i1	10.595	5.75217	5.33615	5.19187	P55418	TRAA_SINFN	4.23e-180
DN35625_c0_g1_i2	5.67005	5.59736	4.85179	6.87967	P04772	GLNA2_BRADU	5.42e-180
DN5915_c0_g1_i1	7.44303	7.51168	7.84199	7.44918	B0DOB5	DAA1A_XENLA	7.4e-180
DN9302_c0_g1_i3	10.0957	5.35898	5.04733	4.16106	P55418	TRAA_SINFN	7.93e-180
DN233322_c0_g1_i1	5.55806	5.83207	6.73635	6.04126	P36938	PGM_ECOLI	9.96e-180
DN115950_c0_g2_i2	5.43304	6.16751	6.1341	6.85286	Q6A830	LPQB_CUTAK	1.43e-179
DN45808_c0_g1_i9	6.70593	6.96957	7.47154	7.44032	P35879	TRA_CORDP	1.52e-179
DN401231_c0_g1_i1	4.9696	5.32869	5.93551	6.18317	Q6A9R8	GCSP_CUTAK	1.7e-179
DN265_c0_g1_i12	5.39927	8.6829	5.9709	7.77167	P35448	TSP1_XENLA	1.78e-179
DN265_c0_g1_i5	5.25126	8.6829	6.27864	7.82009	P35448	TSP1_XENLA	1.78e-179
DN265_c0_g1_i1	5.16741	8.73512	6.35819	7.70689	P35448	TSP1_XENLA	1.78e-179
DN253253_c0_g1_i2	5.36433	5.35898	5.86146	6.86633	Q6AA20	GLGC_CUTAK	2.21e-179
DN9302_c0_g1_i7	9.92521	5.35898	4.85179	4.51116	P55418	TRAA_SINFN	2.44e-179
DN7615_c0_g1_i4	5.29047	5.57338	4.16106	5.2452	B5DF89	CUL3_RAT	3.58e-179
DN49394_c0_g1_i3	6.97167	5.77266	4.16106	5.62698	Q3J317	GLPK_RHOS4	4.01e-179
DN6544_c0_g1_i5	6.53085	7.07828	5.60631	6.06605	Q5ZJP5	FND3A_CHICK	4.73e-179
DN32664_c0_g1_i3	5.36433	7.18604	6.1341	6.33098	B0FYY4	ITB1_SHEEP	5.98e-179
DN35450_c0_g1_i1	7.18624	5.57338	6.35819	7.03046	Q5H7C0	CDC20_PIG	6.66e-179
DN3938_c0_g1_i1	7.16116	6.70308	7.13738	6.66447	Q13045	FLII_HUMAN	7.59e-179
DN1452_c0_g1_i1	8.26427	9.09971	8.51769	8.43951	Q9QZI8	SERC1_MOUSE	7.95e-179
DN265107_c0_g1_i1	7.00037	4.16106	4.72681	4.85623	B9JMY1	THIC_AGRRK	9.1e-179
DN2153_c0_g1_i2	7.40808	8.19198	7.79722	8.21041	Q9Y6N5	SQOR_HUMAN	9.17e-179
DN3683_c0_g1_i3	6.54414	6.38365	6.81182	6.67993	Q5R664	COPB2_PONAB	1.07e-178
DN3634_c0_g1_i5	5.07456	7.5655	5.20346	4.16106	P08108	HSP70_ONCMY	1.5e-178
DN534_c0_g1_i32	6.43392	6.37114	4.16106	5.19187	Q5F2E8	TAOK1_MOUSE	1.98e-178
DN3425_c0_g1_i2	5.6431	6.47965	5.20346	5.82251	Q5EBF1	5NTC_XENTR	2.28e-178
DN74728_c0_g1_i2	5.43304	5.99439	6.96785	5.76095	P56198	CIDEC_MOUSE	3.58e-178
DN1489_c0_g1_i4	6.54414	9.24746	8.70792	7.90588	Q99884	SC6A7_HUMAN	3.89e-178
DN13814_c0_g1_i5	5.46572	5.59736	4.16106	5.0085	Q01082	SPTB2_HUMAN	6.14e-178
DN6716_c0_g1_i3	6.53085	8.17486	7.36462	7.77869	Q64430	ATP7A_MOUSE	7.14e-178
DN30390_c0_g2_i2	4.69429	5.35898	6.40866	6.76912	Q9X8R6	ALF_STRCO	7.83e-178
DN81037_c0_g1_i1	5.36433	5.49806	5.86146	5.07429	P62909	RS3_RAT	8.78e-178
DN234065_c0_g2_i2	5.81964	4.64854	5.74095	4.16106	A5WGD0	MNMG_PSYWF	9.1e-178
DN56031_c0_g1_i4	5.58714	6.28008	5.82265	5.38906	Q6P6V0	G6PI_RAT	1.09e-177
DN3683_c0_g1_i5	6.46234	6.39604	6.57155	6.44559	P35605	COPB2_BOVIN	1.1e-177
DN128611_c0_g1_i1	5.46572	6.72255	5.04733	5.69594	Q08890	IDS_MOUSE	1.16e-177
DN223_c0_g1_i6	9.00987	9.55506	9.17295	9.2429	P13808	B3A2_MOUSE	1.36e-177
DN312009_c1_g1_i2	4.47008	5.59736	4.85179	5.59082	Q7WSY8	CLPB_PROFC	1.82e-177
DN26633_c0_g1_i1	5.61548	6.13776	4.16106	4.85623	Q5ZLD3	KLH13_CHICK	2.06e-177
DN3467_c0_g2_i2	11.7459	11.4692	10.8863	11.186	P15253	CALR_RABIT	2.49e-177
DN7534_c0_g1_i1	7.89952	7.69176	7.38909	8.36713	Q7ZVY5	CISY_DANRE	2.58e-177
DN91136_c0_g1_i1	5.32811	5.71006	5.74095	5.62698	Q9CBZ6	NADE_MYCLE	3.46e-177
DN4467_c0_g1_i3	7.26675	7.40339	6.1341	7.39517	P23258	TBG1_HUMAN	3.49e-177
DN30456_c0_g1_i1	7.85373	7.53885	8.16413	7.63127	Q6PGB8	SMCA1_MOUSE	3.86e-177
DN5026_c0_g1_i2	5.52816	5.96014	4.56238	5.43267	Q9Y4G6	TLN2_HUMAN	3.99e-177
DN3811_c0_g1_i3	6.72919	7.17214	7.71291	6.63303	O88554	PARP2_MOUSE	8.62e-177
DN10490_c0_g1_i2	6.03339	7.07079	5.60631	6.29045	O15460	P4HA2_HUMAN	9.29e-177
DN6371_c0_g1_i10	6.88181	6.95333	6.40866	6.1606	Q08499	PDE4D_HUMAN	9.65e-177
DN3947_c0_g1_i8	5.36433	6.59068	5.27216	6.40848	P59384	ATS15_MOUSE	1.09e-176
DN20853_c0_g2_i4	6.01363	5.96014	5.20346	6.31087	P52293	IMA1_MOUSE	2.58e-176
DN2272_c0_g1_i4	6.97167	7.3855	7.58157	7.26044	P35486	ODPA_MOUSE	3.54e-176
DN6271_c0_g1_i1	7.40098	6.92025	7.01617	6.46376	O54747	DPOD1_RAT	5.25e-176
DN154761_c0_g1_i1	4.16106	5.41692	5.55755	5.76095	Q6A7J9	PYRH_CUTAK	6.54e-176
DN38793_c0_g1_i2	6.82923	5.04158	5.60631	5.19187	A1AZM1	PURA_PARDP	1e-175
DN266_c0_g1_i7	8.38689	8.94312	8.8887	8.56205	Q5RC80	RBM39_PONAB	1.32e-175
DN266_c0_g1_i3	6.50387	6.73219	5.27216	5.99014	Q5RC80	RBM39_PONAB	1.32e-175
DN266_c0_g1_i20	8.49984	8.48632	8.00034	9.08013	Q5RC80	RBM39_PONAB	1.32e-175
DN13203_c0_g2_i1	6.71761	7.02499	6.81182	6.63303	P80467	ADHX_SAAHA	1.47e-175
DN9211_c0_g1_i7	8.453	9.47785	9.1233	9.33099	Q01082	SPTB2_HUMAN	1.79e-175
DN75922_c0_g1_i1	5.69638	4.84725	5.55755	5.34345	C5CCH2	SYDND_MICLC	2.67e-175
DN116775_c0_g1_i3	6.29786	5.57338	6.48092	6.96961	Q6A6G5	NUOH_CUTAK	3.2e-175
DN5915_c0_g1_i12	7.55578	7.43849	7.85951	7.57583	Q80U19	DAAM2_MOUSE	8.62e-175
DN230_c0_g2_i2	4.59726	4.64854	9.30603	11.2545	P25247	POL2_TORVR	1.36e-174
DN40957_c0_g1_i1	4.47008	6.67334	4.16106	4.85623	O95714	HERC2_HUMAN	1.74e-174
DN21947_c0_g1_i4	5.6431	6.38365	4.16106	4.85623	P98198	AT8B2_HUMAN	2.03e-174
DN21549_c0_g1_i1	5.95235	5.29741	4.16106	4.16106	Q6P4T2	U520_MOUSE	2.04e-174
DN50447_c0_g1_i2	7.64832	8.17141	8.07712	8.31997	Q5CD18	TGFR1_PIG	2.12e-174
DN361571_c0_g1_i2	5.84281	4.72307	5.39618	5.07429	A0QYY6	RS1_MYCS2	2.17e-174
DN5484_c0_g1_i1	6.9813	7.31792	7.7881	7.17723	Q5XIH4	LIAS_RAT	2.67e-174
DN4714_c0_g1_i2	6.43392	6.26653	6.88335	7.21945	Q7ZVF3	SDHA_DANRE	5.61e-174
DN16281_c0_g1_i1	7.03774	6.35851	6.19389	5.47449	Q5T2S8	ARMC4_HUMAN	6.46e-174
DN58008_c0_g1_i2	6.31369	6.01115	7.16611	7.20902	P41403	AK_MYCSM	7.44e-174
DN545_c0_g1_i2	5.25126	6.42047	5.4528	5.55343	Q7SY23	AL4A1_DANRE	9.95e-174
DN7436_c0_g1_i2	7.44991	7.80771	7.96034	7.92496	Q8CGC7	SYEP_MOUSE	1.01e-173
DN11652_c0_g2_i3	5.36433	7.00151	5.33615	6.29045	Q9UKP5	ATS6_HUMAN	1.03e-173
DN11652_c0_g2_i6	5.16741	6.8949	4.16106	5.90923	Q9UKP5	ATS6_HUMAN	1.03e-173
DN222869_c0_g1_i1	6.23251	4.9011	6.22276	4.16106	A1B431	SYDND_PARDP	1.18e-173
DN13814_c0_g1_i1	5.46572	5.66633	4.16106	4.76453	Q62261	SPTB2_MOUSE	1.33e-173
DN100446_c0_g1_i4	4.9696	5.85123	4.72681	5.19187	Q5F4C4	SHOC2_CHICK	1.44e-173
DN22341_c0_g2_i5	5.21031	6.59068	4.95619	5.82251	Q9IBG7	KCP_XENLA	2.41e-173
DN180895_c0_g1_i1	5.07456	5.32869	5.65301	5.2956	P21173	DNAA_MICLU	2.54e-173
DN21457_c0_g1_i1	5.55806	5.64381	6.79334	6.37031	Q6A780	DNAE2_CUTAK	3.54e-173
DN4206_c0_g1_i3	7.42216	7.25353	7.80629	6.61703	Q8BJT9	EDEM2_MOUSE	3.88e-173
DN15516_c0_g2_i2	4.59726	5.19676	5.20346	6.26969	P77316	YBDR_ECOLI	4.3e-173
DN213921_c0_g2_i1	4.9696	5.96014	5.12901	6.53405	P08183	MDR1_HUMAN	8.38e-173
DN3683_c0_g1_i6	5.29047	5.41692	5.60631	5.13512	P35605	COPB2_BOVIN	9.27e-173
DN5384_c0_g1_i5	6.28182	5.77266	7.15182	6.49937	Q9GK13	MUTA_BOVIN	1.27e-172
DN100438_c0_g1_i2	11.2374	10.6125	11.0891	11.8304	P32007	ADT3_BOVIN	1.53e-172
DN2903_c0_g2_i14	7.14418	6.59068	6.61467	6.81163	Q6P6T4	EMAL2_RAT	3.71e-172
DN273551_c0_g1_i1	5.29047	5.96014	4.16106	5.2956	Q5ZKV8	KIF2A_CHICK	7.41e-172
DN115398_c0_g1_i2	8.00561	8.36792	7.94402	8.45268	Q9EQS0	TALDO_RAT	8.33e-172
DN3210_c0_g1_i1	7.41514	7.51715	8.56633	8.36249	Q99JY0	ECHB_MOUSE	9.76e-172
DN5195_c0_g1_i1	7.47038	8.23555	7.19426	7.59189	P47843	GTR3_SHEEP	1.04e-171
DN19873_c0_g1_i17	6.18122	6.18214	4.56238	6.09036	Q6KCD5	NIPBL_MOUSE	1.08e-171
DN202925_c0_g1_i1	5.46572	6.28008	5.12901	5.90923	Q6U7I1	UBP7_CHICK	1.66e-171
DN231692_c0_g1_i6	8.05135	8.86435	7.50545	7.92496	P23606	TGM1_RAT	2.54e-171
DN23277_c0_g1_i1	6.92247	4.44339	4.16106	4.51116	Q5L3R2	RPOA_GEOKA	2.62e-171
DN779_c0_g1_i2	7.49721	7.22692	8.31743	7.72881	P38024	PUR6_CHICK	3.63e-171
DN29054_c0_g1_i1	7.11832	7.63759	6.93467	8.06337	P53358	PCNA_STYCL	4e-171
DN310281_c0_g1_i1	5.52816	6.04403	5.55755	4.16106	Q16644	MAPK3_HUMAN	5.35e-171
DN146004_c0_g1_i1	5.52816	5.12275	6.19389	5.07429	Q6A911	PYRF_CUTAK	5.67e-171
DN105370_c0_g1_i2	7.85373	7.3242	7.43679	8.59012	A6QLU1	GPDM_BOVIN	6.2e-171
DN12500_c0_g1_i8	5.32811	5.59736	5.04733	5.79214	Q64249	NR6A1_MOUSE	6.61e-171
DN1624_c0_g1_i4	6.87145	7.58648	8.29834	6.85286	Q5RDQ2	MPP5_PONAB	9.08e-171
DN2008_c0_g1_i1	8.16385	8.49185	7.20812	6.38953	Q5R4J5	SYT1_PONAB	1.08e-170
DN46403_c0_g1_i4	5.02386	5.90691	4.56238	4.76453	P49024	PAXI_CHICK	1.8e-170
DN10671_c0_g1_i1	6.40488	5.87008	5.82265	5.13512	Q969Q6	P2R3C_HUMAN	4.15e-170
DN56031_c0_g1_i1	6.93245	7.01721	7.53858	7.32942	P08059	G6PI_PIG	4.29e-170
DN68572_c0_g2_i1	5.39927	6.22503	5.9709	4.51116	P0CH00	RIR1B_MYCS2	5.28e-170
DN1552_c0_g1_i1	6.3448	6.72256	5.69783	6.13761	Q9QW30	NOTC2_RAT	9.42e-170
DN180569_c0_g2_i1	6.43392	5.62083	6.1341	4.16106	Q4FVA1	ACSA_PSYA2	9.9e-170
DN192873_c1_g1_i1	4.47008	5.35898	5.60631	5.62698	Q6A7L9	SYP_CUTAK	1.24e-169
DN166563_c0_g1_i4	4.8469	5.59736	5.50647	4.93646	Q04222	TRA1_COMTE	1.37e-169
DN22147_c0_g1_i2	6.65818	6.61182	5.69783	5.13512	P38400	GNAI2_CANLF	1.43e-169
DN22147_c0_g1_i1	6.44821	6.72256	5.89906	5.07429	P38400	GNAI2_CANLF	1.43e-169
DN7817_c0_g1_i2	4.8469	6.10728	4.16106	5.2956	Q9H0K1	SIK2_HUMAN	2.09e-169
DN23029_c0_g2_i1	6.07201	5.6884	4.16106	5.85212	Q6NX31	MCM7_XENTR	2.41e-169
DN343040_c0_g1_i1	6.80762	4.55971	4.56238	4.16106	O93058	RDRP_TMVOM	2.68e-169
DN293_c3_g1_i2	6.60868	5.44468	7.24891	6.20535	Q4PE39	SEC23_USTMA	2.79e-169
DN16066_c0_g1_i1	5.58714	5.7928	6.45727	6.42716	P9WQK3	ETTA_MYCTU	5.49e-169
DN9672_c0_g1_i2	5.21031	6.18214	7.20812	6.87967	Q14562	DHX8_HUMAN	6.09e-169
DN2977_c0_g1_i8	7.80643	7.602	7.3271	7.66958	O14775	GNB5_HUMAN	6.34e-169
DN54685_c2_g1_i1	5.36433	6.0277	6.65646	6.87967	Q8FTA8	ACNA_COREF	6.97e-169
DN2537_c0_g1_i13	6.51743	6.54737	6.27864	5.76095	P47990	XDH_CHICK	1.22e-168
DN8353_c0_g1_i1	7.30534	7.75323	8.34869	7.43141	Q5RBG4	KAT5_PONAB	1.71e-168
DN14734_c0_g1_i2	4.91098	6.59068	4.16106	4.16106	Q99PV0	PRP8_MOUSE	1.86e-168
DN544_c0_g2_i5	6.3448	7.46709	7.41314	6.82551	Q5RCB9	PMGT1_PONAB	2.21e-168
DN45736_c0_g2_i1	5.58714	6.44446	5.129	4.16106	P09958	FURIN_HUMAN	3.12e-168
DN76393_c0_g2_i1	5.84281	6.76069	6.35818	6.26969	Q9JHS4	CLPX_MOUSE	3.52e-168
DN63285_c0_g2_i1	9.57846	9.54181	9.56694	9.08296	Q5NVR2	MDHM_PONAB	4.11e-168
DN7296_c0_g1_i2	7.1945	6.8069	7.28855	7.53486	Q2TBR0	PCCB_BOVIN	4.91e-168
DN52700_c0_g1_i1	7.26675	7.63256	6.3057	6.55106	O02827	MYLK_SHEEP	6.59e-168
DN1133_c0_g1_i2	7.33547	7.10051	8.18508	8.20522	P55735	SEC13_HUMAN	6.82e-168
DN105175_c0_g1_i1	4.77563	6.40831	4.16106	5.43267	Q95JF4	DNAJ1_CHLAE	7.72e-168
DN60503_c0_g1_i3	5.29047	6.0277	5.39618	5.62698	C5C9Q4	RS2_MICLC	8.42e-168
DN120_c1_g1_i6	9.29199	9.92524	10.801	9.60468	Q8CFG0	SULF2_MOUSE	8.87e-168
DN3827_c0_g1_i12	6.91241	7.39745	7.07809	7.25031	Q60HE9	MA2B1_MACFA	9.42e-168
DN415660_c0_g1_i1	4.77563	5.47171	6.81182	6.20535	Q6A9B0	MEND_CUTAK	1.19e-167
DN12504_c0_g1_i1	6.10947	5.49806	6.03877	5.0085	P13567	UVRA_MICLU	1.3e-167
DN455_c0_g1_i2	6.67027	6.66328	6.07136	6.79761	Q9CVB6	ARPC2_MOUSE	1.66e-167
DN100304_c0_g1_i1	7.54939	4.9011	6.16435	5.07429	O50286	DLDH_VIBPA	1.68e-167
DN1851_c0_g1_i1	8.58918	8.00693	8.01603	8.66367	P49411	EFTU_HUMAN	2.73e-167
DN1550_c0_g1_i2	8.05135	8.63622	8.95914	8.68242	Q13435	SF3B2_HUMAN	3.1e-167
DN7986_c0_g1_i2	6.5573	6.46803	6.69699	6.33098	Q9WVE9	ITSN1_RAT	5.93e-167
DN15824_c0_g1_i1	9.43806	8.46959	8.40924	7.89946	A4IJ21	MNS1_XENTR	6.81e-167
DN63172_c0_g1_i4	6.63366	6.23901	5.9709	5.96376	P0A045	T431_STAAW	9.72e-167
DN1895_c0_g1_i4	7.94388	8.32204	8.59787	8.04024	Q5R886	TF2B_PONAB	1.39e-166
DN6805_c0_g1_i1	8.35082	7.93544	8.06209	7.86692	Q7ZXV3	ARP2B_XENLA	1.46e-166
DN2697_c0_g3_i2	6.68226	7.71096	7.47154	6.96961	Q8VC12	HUTU_MOUSE	1.6e-166
DN8781_c0_g1_i7	5.29047	5.75217	5.78251	5.43267	Q5RBI5	SF3B3_PONAB	1.6e-166
DN106612_c0_g1_i2	6.05285	5.38837	4.16106	5.43267	P11505	AT2B1_RAT	1.66e-166
DN24140_c0_g1_i2	6.69415	5.71006	4.16106	4.16106	P23098	DYHC_TRIGR	1.66e-166
DN175437_c0_g1_i1	4.16106	5.12275	4.72681	6.16059	Q6A8I4	AROC_CUTAK	2.28e-166
DN9034_c0_g1_i9	5.58714	5.71006	4.16106	5.47449	Q8AVM5	VPP1_XENLA	2.6e-166
DN390841_c0_g1_i1	5.39928	5.64381	6.03877	4.51116	C5CBT8	UPPP_MICLC	2.7e-166
DN455_c0_g1_i3	6.44821	6.73219	6.35819	6.82551	Q9CVB6	ARPC2_MOUSE	2.95e-166
DN378303_c0_g2_i2	5.39928	4.44339	5.39618	6.01596	Q70AC7	5S_PROFR	7.41e-166
DN103617_c0_g1_i6	6.24916	5.66633	6.16435	5.69594	P0A045	T431_STAAW	7.57e-166
DN21635_c1_g2_i2	5.84281	5.7928	6.43318	5.59082	P9WH43	RS1_MYCTU	8.38e-166
DN16135_c0_g1_i1	5.69638	6.25285	5.27216	5.43267	P70207	PLXA2_MOUSE	1.27e-165
DN49284_c0_g1_i1	4.77563	5.26507	5.86146	6.20535	P52560	RELA_STRCO	1.92e-165
DN16458_c0_g1_i4	6.07201	5.54886	4.85179	4.16106	Q3SZ71	MPPB_BOVIN	2.06e-165
DN27450_c0_g1_i2	6.43392	7.01721	4.16106	5.07429	O93574	RELN_CHICK	2.36e-165
DN19719_c0_g1_i2	5.49741	5.7928	4.85179	5.79214	Q9HD20	AT131_HUMAN	3.59e-165
DN7798_c0_g1_i1	8.13017	7.61226	7.88539	8.17901	P49432	ODPB_RAT	7.83e-165
DN8789_c0_g1_i2	6.19855	6.5692	6.61467	6.09036	Q9WUC8	PLRG1_RAT	8.63e-165
DN14998_c0_g1_i3	8.59843	8.88129	7.68366	7.98073	Q9GKM4	BCAT1_SHEEP	1.05e-164
DN132737_c0_g1_i1	6.23251	6.25285	5.86146	6.94451	Q6A6A0	NANE_CUTAK	1.14e-164
DN230301_c0_g1_i1	4.47008	5.64381	5.86146	5.19187	Q6A651	PDRP_CUTAK	1.24e-164
DN43789_c0_g1_i3	4.91098	6.15272	4.16106	4.93646	Q9Y4K4	M4K5_HUMAN	1.66e-164
DN11855_c0_g1_i1	6.71761	7.65257	8.5503	7.86033	Q3TCH7	CUL4A_MOUSE	3e-164
DN21952_c0_g1_i2	5.43304	5.87008	4.85179	4.51116	Q9ULM6	CNOT6_HUMAN	3.29e-164
DN1314_c0_g1_i1	8.61978	9.16687	8.43276	8.31997	Q1W674	HXK2_PIG	4.05e-164
DN7756_c0_g1_i1	8.88955	6.94513	5.82265	5.5147	Q26630	IDLC_STRPU	4.33e-164
DN211363_c0_g4_i1	5.6431	5.49806	4.16106	6.01596	A4YWY8	KUP2_BRASO	4.5e-164
DN3126_c0_g1_i3	10.3281	5.41692	6.07136	5.90923	O31504	YEEA_BACSU	5.58e-164
DN3620_c0_g5_i1	12.0755	5.41692	8.0469	5.66199	O31504	YEEA_BACSU	5.58e-164
DN32337_c0_g1_i1	6.24916	5.47171	5.20346	6.01596	Q9L1K2	GLGE1_STRCO	7.75e-164
DN23903_c0_g1_i2	5.46572	6.29348	6.73635	6.76912	Q01651	G3P_CORGL	8.95e-164
DN1770_c0_g1_i2	10.1141	9.05188	8.06963	7.88653	Q9UL16	CFA45_HUMAN	1.25e-163
DN11624_c0_g1_i4	5.46572	5.94266	5.129	4.76453	P63329	PP2BA_RAT	2.09e-163
DN12317_c0_g1_i1	6.71761	6.92859	6.27864	5.99014	Q17R09	PRP16_BOVIN	2.19e-163
DN239689_c0_g1_i1	5.32811	5.12275	6.45727	6.11421	Q6AAP6	COBQ_CUTAK	2.44e-163
DN52050_c0_g2_i1	5.07456	5.59736	6.0053	6.40848	P9WNT9	DPO3X_MYCTU	2.72e-163
DN4737_c0_g1_i2	7.16116	7.00938	6.1341	7.7504	P48818	ACADV_BOVIN	3.29e-163
DN12414_c0_g1_i5	5.69638	7.93951	5.4528	5.5147	Q9VQH2	DUOX_DROME	5.89e-163
DN17175_c0_g1_i1	5.61548	5.23156	5.4528	5.55343	Q5ZL72	CH60_CHICK	5.94e-163
DN890_c0_g1_i2	7.01918	7.72991	8.06209	8.15769	Q92643	GPI8_HUMAN	9.18e-163
DN2292_c0_g1_i1	6.43392	7.53885	6.91777	7.44032	Q9Y484	WIPI4_HUMAN	1.06e-162
DN7748_c0_g1_i10	5.12227	5.83207	4.95619	5.07429	Q9JIX5	CHD8_RAT	1.79e-162
DN4702_c0_g1_i1	6.5573	6.4563	7.26225	7.4134	Q5U379	SNF5_DANRE	2.06e-162
DN238514_c0_g2_i1	6.1278	5.16055	5.55755	4.16106	Q3IZ91	CCCR_RHOS4	2.54e-162
DN6493_c0_g1_i8	6.58323	7.36739	7.6538	7.44918	Q80TP3	UBR5_MOUSE	3.26e-162
DN5072_c0_g2_i6	6.19855	5.99439	4.16106	4.93646	Q86VS8	HOOK3_HUMAN	4.53e-162
DN1550_c0_g1_i4	8.05135	8.36792	8.54492	8.52927	Q13435	SF3B2_HUMAN	6.61e-162
DN19573_c0_g1_i1	7.02849	7.39149	7.80629	7.43141	Q13123	RED_HUMAN	8.16e-162
DN6521_c0_g1_i1	6.59602	6.88635	7.13738	6.89288	Q02978	M2OM_HUMAN	8.66e-162
DN32882_c1_g1_i1	6.54414	4.16106	4.16106	5.38906	Q9X576	CATE_RHIME	1.08e-161
DN645_c0_g1_i2	7.16957	8.30326	5.74095	6.89288	Q05793	PGBM_MOUSE	1.17e-161
DN152355_c1_g1_i1	6.57033	5.19676	5.33615	4.51116	Q03638	NADE_RHOCA	1.22e-161
DN19153_c1_g1_i1	6.28182	6.19659	6.38366	5.69594	P13804	ETFA_HUMAN	1.24e-161
DN7880_c0_g3_i1	5.97312	6.01115	4.16106	4.16106	Q8BW94	DYH3_MOUSE	1.3e-161
DN68153_c0_g2_i2	5.81964	5.26507	6.38366	4.93646	C5C7X9	GYRA_MICLC	2.04e-161
DN124440_c0_g1_i1	5.6431	6.22503	5.69783	5.38905	Q5R2J2	G3P_PELSI	2.09e-161
DN33310_c0_g1_i1	4.9696	5.57338	5.9709	6.38953	Q6A6S8	TRUA_CUTAK	2.59e-161
DN332912_c0_g1_i3	4.59726	4.64854	6.35818	6.60084	B2GIK0	RPOC_KOCRD	3.24e-161
DN17865_c1_g1_i3	6.39011	4.44339	6.22276	5.34345	A1B002	EFTU_PARDP	4.45e-161
DN39715_c0_g1_i13	5.95235	7.37346	6.07136	5.85212	P31646	S6A13_RAT	7.92e-161
DN5900_c0_g1_i1	10.3745	9.39036	9.49071	9.61641	Q99PD4	ARC1A_RAT	1.11e-160
DN42010_c0_g2_i3	6.18122	4.9011	5.9709	4.16106	Q98DK4	MASZ_RHILO	1.43e-160
DN1093_c0_g1_i3	9.36236	8.88969	10.3248	9.65862	Q5ZJH9	DKC1_CHICK	2.25e-160
DN1620_c0_g1_i1	9.34418	9.07231	9.23436	8.99578	P53634	CATC_HUMAN	2.53e-160
DN116703_c0_g1_i1	8.75548	8.44983	8.38533	8.81742	P50143	TCPG_XENLA	3.9e-160
DN12414_c0_g2_i1	7.07413	8.65113	7.00025	6.75466	Q8HZK2	DUOX2_PIG	4.17e-160
DN12707_c0_g1_i1	5.86553	6.19659	4.16106	5.2452	Q9ULT8	HECD1_HUMAN	4.69e-160
DN142_c0_g1_i1	5.21031	5.52376	5.78251	5.5147	Q6PDV7	RL10_RAT	4.91e-160
DN61100_c0_g2_i3	6.39011	5.08318	4.16106	4.65498	Q16CP0	DXS2_ROSDO	5e-160
DN65785_c0_g2_i1	5.74727	4.16106	5.4528	5.43267	Q89J75	RPOC_BRADU	5.88e-160
DN1776_c0_g1_i3	7.53005	7.34287	8.03155	7.2401	O75150	BRE1B_HUMAN	6.84e-160
DN846_c0_g1_i1	8.12162	9.75774	9.97524	9.54046	P08253	MMP2_HUMAN	6.87e-160
DN66490_c0_g1_i3	6.86102	4.84725	5.65301	4.16106	Q8FVE4	OCD_BRUSU	8.09e-160
DN38621_c0_g2_i2	4.69429	4.16106	6.19389	5.76095	Q1Q9K1	PYRG_PSYCK	1.1e-159
DN156989_c0_g1_i1	4.9696	5.64381	5.93551	6.64884	Q3M8N0	NIFJ_ANAVT	1.93e-159
DN549_c0_g1_i3	10.0527	11.6037	10.9395	10.8642	Q6P4Z2	CO2A1_XENTR	2e-159
DN47180_c0_g1_i3	4.91098	6.13776	4.56238	5.9368	P42476	EFTU_TERFE	2.29e-159
DN35640_c0_g1_i1	4.91098	6.34576	7.48293	6.63303	Q23551	UNC22_CAEEL	2.72e-159
DN16422_c0_g1_i1	5.69638	6.39604	5.86146	5.82251	P21675	TAF1_HUMAN	3.14e-159
DN2443_c1_g1_i16	7.02849	7.6426	5.20346	6.82551	Q9QYP0	MEGF8_RAT	4.21e-159
DN6237_c0_g1_i1	7.70108	7.24692	7.13738	7.59985	P21279	GNAQ_MOUSE	4.39e-159
DN25036_c0_g1_i1	5.12227	5.7313	4.16106	5.13512	Q6PCL9	PAPOG_MOUSE	4.87e-159
DN22921_c0_g1_i3	5.29047	6.13776	4.56238	5.2956	Q7Z3G6	PRIC2_HUMAN	4.88e-159
DN35441_c0_g1_i2	5.69638	6.12261	4.16106	5.59082	Q62073	M3K7_MOUSE	5.08e-159
DN93423_c1_g1_i1	4.91098	6.0277	6.73635	5.13512	Q6AAX3	PSTB_CUTAK	6.33e-159
DN68645_c0_g1_i1	4.69429	5.29741	6.10312	6.11421	A1TFL3	OTSA_MYCVP	7.73e-159
DN97027_c0_g2_i4	5.32811	5.87008	5.93551	7.06573	Q6PH19	GATM_DANRE	1.23e-158
DN71868_c0_g1_i1	4.59726	5.08318	6.16435	5.2956	Q6A6G1	NUOD_CUTAK	1.3e-158
DN12315_c0_g1_i1	5.55806	5.97738	4.16106	5.34345	P23696	PP2A_DROME	2.18e-158
DN43639_c0_g1_i1	6.10947	6.09177	4.56238	5.2956	P29994	ITPR1_RAT	2.57e-158
DN27741_c0_g1_i1	5.84281	6.43252	6.38366	5.88102	Q6P5M2	WDR61_DANRE	2.86e-158
DN132290_c0_g1_i1	5.58714	4.64854	5.20346	5.82251	P70920	ACNA_BRADU	4.5e-158
DN549_c0_g1_i12	8.65271	10.4326	7.51658	9.11088	Q6P4Z2	CO2A1_XENTR	7.14e-158
DN2586_c0_g1_i11	4.59726	7.50066	4.16106	4.85623	Q75GX9	GLB63_ORYSJ	9.52e-158
DN89676_c0_g1_i1	4.47008	5.7928	5.86146	6.13761	Q6A7F0	CLPP1_CUTAK	9.92e-158
DN689_c0_g1_i1	7.44991	7.61226	7.33971	8.21557	P62198	PRS8_RAT	1.17e-157
DN180567_c0_g1_i1	6.14586	4.78843	5.27216	4.16106	Q59735	HEMH_RHOCA	1.5e-157
DN6775_c0_g1_i2	7.10959	4.16106	4.16106	4.16106	B7GJ64	EFG_ANOFW	1.9e-157
DN143089_c0_g1_i1	4.77563	5.04157	6.3057	5.5147	Q6A6R1	RPOA_CUTAK	2.17e-157
DN434315_c0_g1_i1	4.9696	4.9011	5.27216	6.2486	B6HAA7	ARO1_PENRW	2.27e-157
DN76783_c0_g1_i1	4.91098	5.6884	6.71681	5.43267	Q9KXR3	PYRC_STRCO	2.3e-157
DN27539_c0_g1_i6	5.36433	6.06014	4.56238	6.04126	P97608	OPLA_RAT	2.36e-157
DN83191_c0_g1_i1	5.07456	4.64854	6.61467	5.85212	Q6A6X6	METN_CUTAK	2.54e-157
DN130429_c1_g1_i1	5.16741	5.44468	6.3322	5.2452	Q6A900	RNY_CUTAK	2.71e-157
DN5112_c0_g1_i1	11.9074	12.3837	12.9594	12.9555	Q6PBF0	RL8_XENTR	3.08e-157
DN79113_c0_g2_i2	5.86553	5.59736	5.78252	5.38905	C5CB51	MNMA_MICLC	3.12e-157
DN1761_c0_g1_i7	8.21694	8.24214	8.12129	8.42175	Q5E964	PSD13_BOVIN	3.25e-157
DN406779_c0_g1_i1	4.77563	4.16106	6.27864	5.99014	Q6A8W6	KITH_CUTAK	3.27e-157
DN328766_c0_g1_i2	6.14586	6.35851	6.71681	6.58445	F1Q4S1	ATP9B_DANRE	5.99e-157
DN3085_c0_g1_i3	8.04232	8.84288	8.68853	9.27287	O93428	CATD_CHIHA	8.38e-157
DN549_c0_g1_i17	10.0415	11.5705	10.9022	10.7737	Q6P4Z2	CO2A1_XENTR	8.82e-157
DN549_c0_g1_i21	9.98979	11.5339	10.8552	10.8576	Q6P4Z2	CO2A1_XENTR	8.82e-157
DN2267_c1_g1_i2	5.74727	5.8126	5.50647	5.76095	Q8I1N6	AP2A_PLAF7	9.28e-157
DN178_c0_g2_i6	9.88428	9.99592	11.046	11.1223	O62739	RS4Y1_MONDO	9.74e-157
DN3329_c0_g1_i1	7.07413	7.78073	7.41314	7.37669	P15505	GCSP_CHICK	1.43e-156
DN846_c0_g1_i7	7.90451	9.6495	9.82372	9.4754	P08253	MMP2_HUMAN	1.43e-156
DN20267_c0_g1_i1	9.73738	9.79842	10.2882	9.71425	Q92769	HDAC2_HUMAN	3.26e-156
DN284462_c0_g1_i5	10.4781	10.3506	10.602	10.9275	Q80W14	PR40B_MOUSE	3.38e-156
DN387316_c0_g3_i1	5.02386	5.16055	5.39618	5.79214	P11653	MUTB_PROFR	4.21e-156
DN22973_c0_g1_i3	4.91098	6.06014	4.56238	5.85212	F1MBP6	KLHL3_BOVIN	4.63e-156
DN40697_c0_g1_i3	6.28182	6.25285	4.16106	5.2956	A5YKK6	CNOT1_HUMAN	6.28e-156
DN5203_c0_g1_i7	7.15269	5.75217	6.35819	6.96961	P31649	S6A13_MOUSE	6.67e-156
DN53897_c1_g1_i1	5.79601	4.9011	5.55755	5.59082	Q6A7P7	DAPB_CUTAK	6.84e-156
DN28874_c0_g2_i3	5.02386	5.6884	4.16106	5.2452	P10589	COT1_HUMAN	8.09e-156
DN2586_c0_g1_i5	4.47008	6.52517	4.56238	4.16106	Q75GX9	GLB63_ORYSJ	1.22e-155
DN41893_c0_g1_i3	6.5573	7.37346	5.39618	6.51682	P0DSP1	SORL_RAT	1.36e-155
DN221434_c0_g1_i2	5.32811	5.90691	4.16106	5.0085	Q4G0F5	VP26B_HUMAN	1.46e-155
DN18120_c0_g1_i1	5.7719	5.83207	4.16106	6.37031	P49620	DGKG_RAT	1.86e-155
DN6313_c0_g1_i9	6.46234	7.63256	5.65301	6.71031	Q9JKZ2	SC5A3_MOUSE	1.95e-155
DN6393_c0_g1_i1	5.97312	5.99439	6.65646	7.0185	A4QNE6	WDR92_XENTR	1.95e-155
DN41943_c0_g1_i1	8.06479	7.65257	7.76967	8.34845	Q5R5M6	PYGB_PONAB	2.17e-155
DN256565_c0_g1_i1	6.62123	6.61182	6.48092	6.37031	Q07068	TPM1_CIOIN	2.23e-155
DN3179_c0_g1_i9	6.76336	7.20663	6.84805	6.20535	B2RX14	TUT4_MOUSE	2.72e-155
DN61100_c0_g3_i1	5.32811	5.38837	5.33615	6.18317	A1R5N7	DXS_PAEAT	2.77e-155
DN471276_c0_g1_i1	5.02386	5.97738	4.16106	4.85623	A6GWA9	METK_FLAPJ	2.92e-155
DN24760_c0_g1_i1	6.24916	4.95099	4.16106	5.34345	P95469	RECA_PARDE	5.26e-155
DN57988_c0_g1_i1	5.36433	6.13776	4.16106	5.13512	P83852	CBPD_LOPSP	6.37e-155
DN13713_c0_g1_i2	5.99354	5.41692	4.16106	4.93646	P11216	PYGB_HUMAN	6.42e-155
DN14657_c0_g1_i1	6.14586	6.96957	7.18025	5.69594	Q7SYR1	OSGEP_XENLA	8.03e-155
DN6313_c0_g1_i13	5.6431	6.23901	4.72681	5.5147	P31637	SC5A3_CANLF	9.32e-155
DN56373_c0_g1_i1	6.49017	6.30675	6.1341	6.75466	Q9WVA3	BUB3_MOUSE	1.19e-154
DN26785_c0_g1_i1	5.36433	6.51394	4.16106	5.88102	P21613	KINH_DORPE	1.41e-154
DN61724_c0_g1_i2	6.44821	4.16106	5.20346	4.16106	A1B5Q5	SYL_PARDP	2.04e-154
DN39715_c0_g1_i12	6.21564	7.99526	7.89392	6.95712	P31649	S6A13_MOUSE	2.58e-154
DN258625_c0_g1_i2	5.29047	5.88864	5.9709	5.2956	P38650	DYHC1_RAT	2.69e-154
DN37062_c0_g2_i2	4.9696	4.44339	4.56238	6.33098	A1SCM2	GYRA_NOCSJ	2.71e-154
DN2569_c0_g1_i1	13.204	13.5336	14.0172	14.4133	Q9DG68	RLA0_RANSY	2.79e-154
DN4118_c0_g1_i1	5.12227	5.8126	4.56238	5.76095	Q2HJ88	RTCA_BOVIN	2.85e-154
DN134109_c0_g1_i1	6.90229	4.84725	5.39618	4.16106	P43089	HEM1_PARDP	2.93e-154
DN38879_c0_g1_i1	5.25126	5.08318	5.78251	6.46376	P0AAE0	CYCA_ECOLI	3.28e-154
DN178381_c0_g2_i1	4.47008	5.32869	6.40866	6.55106	Q8KY18	DHA_MYCSM	4.83e-154
DN11441_c0_g2_i3	7.37224	7.61736	6.75561	7.07729	Q8WPW2	PDX1_SUBDO	5.01e-154
DN15729_c0_g1_i1	6.44821	5.92492	4.16106	5.43267	Q8JIY1	ADA10_XENLA	5.58e-154
DN166893_c0_g1_i1	4.69429	4.55971	6.0053	6.35079	Q6A9Q5	MRAY_CUTAK	6.43e-154
DN347458_c0_g2_i1	7.80643	5.12275	4.85179	4.51116	Q6RH51	TAUZ_PARPN	8.29e-154
DN45318_c1_g3_i2	5.36433	5.92492	5.4528	6.11421	A1R317	PCKG_PAEAT	9.95e-154
DN11038_c0_g1_i2	6.79669	6.33289	6.67687	6.33098	Q7SXR3	MAEA_DANRE	1.09e-153
DN347458_c0_g1_i4	7.22708	4.9011	5.20346	5.0085	Q6RH51	TAUZ_PARPN	1.16e-153
DN24068_c0_g1_i9	7.91446	7.46709	5.93551	8.57415	P10978	POLX_TOBAC	1.28e-153
DN210_c0_g1_i13	8.48329	7.96766	7.51658	8.34375	P27446	FYN_XIPHE	1.38e-153
DN4016_c0_g1_i3	7.43611	7.21343	6.61467	7.12259	P33194	DDB1_CHLAE	1.44e-153
DN182152_c1_g1_i1	5.39928	5.41692	4.56238	5.34345	C5CBI2	SYT_MICLC	1.74e-153
DN1355_c0_g1_i1	7.10959	6.26653	7.41314	6.63303	Q27331	VATA2_DROME	1.8e-153
DN11166_c0_g1_i1	8.30632	8.75825	8.63887	8.26624	Q2VPH1	F50AA_XENLA	2.03e-153
DN1561_c0_g1_i5	8.44276	8.8834	8.63381	7.64672	Q9BUQ8	DDX23_HUMAN	2.11e-153
DN3639_c0_g1_i1	8.17628	8.29695	8.90559	8.82418	P84173	PHB_CHICK	2.28e-153
DN259168_c0_g1_i1	4.91098	4.16106	5.4528	6.78344	P22276	RPC2_YEAST	2.57e-153
DN178381_c0_g1_i2	4.69429	5.35898	5.82265	6.31087	Q8KY18	DHA_MYCSM	3.13e-153
DN17226_c0_g2_i2	6.59602	5.16055	4.56238	4.76453	A4WTP4	GUAA_RHOS5	3.33e-153
DN6107_c0_g1_i6	6.71761	6.76069	7.06287	6.44559	P10619	PPGB_HUMAN	3.33e-153
DN65444_c0_g1_i1	5.90972	6.12261	4.16106	4.51116	B0S6R1	NCKP1_DANRE	4.02e-153
DN365528_c0_g1_i1	5.02386	5.08318	6.07136	5.38905	P47963	RL13_MOUSE	4.31e-153
DN42675_c0_g1_i6	5.32811	5.75217	4.56238	4.16106	Q14344	GNA13_HUMAN	5.41e-153
DN2982_c0_g1_i2	6.79669	6.4563	7.40117	7.56773	Q53G59	KLH12_HUMAN	6.53e-153
DN991_c0_g1_i7	7.16116	6.91185	6.527	7.64672	O14841	OPLA_HUMAN	6.81e-153
DN153098_c0_g2_i2	5.79601	6.54737	4.16106	5.62698	Q05397	FAK1_HUMAN	6.95e-153
DN80257_c0_g1_i10	6.14586	7.18604	5.4528	5.76095	Q90966	RARA_CHICK	1e-152
DN5287_c0_g1_i1	8.4564	8.05642	8.63381	8.18955	Q16K15	EIF3I_AEDAE	1.13e-152
DN60398_c0_g1_i1	6.37518	5.47171	4.16106	4.51116	Q863B3	SND1_BOVIN	1.94e-152
DN234210_c0_g2_i1	5.36433	5.16055	5.82265	5.34345	P62243	RS8_RAT	2.1e-152
DN5868_c0_g1_i3	6.26559	6.46803	6.81182	6.44559	P06766	DPOLB_RAT	2.59e-152
DN10444_c0_g3_i1	5.36433	5.08318	6.251	5.79214	P52154	RHO_MICLU	2.6e-152
DN18837_c0_g1_i1	5.86553	6.31988	5.4528	4.93646	E9Q555	RN213_MOUSE	2.81e-152
DN353653_c0_g1_i1	6.03339	6.76069	7.38909	5.69594	Q62148	AL1A2_MOUSE	2.83e-152
DN237344_c0_g1_i1	5.16741	5.57338	5.27216	5.0085	Q6FP38	DBP1_CANGA	2.94e-152
DN758_c0_g1_i1	8.60762	8.87708	8.58219	9.16248	Q9TRY0	FKBP4_BOVIN	3.47e-152
DN21801_c0_g1_i1	6.44821	6.46803	6.22276	6.94451	Q9NVI7	ATD3A_HUMAN	5.15e-152
DN121775_c0_g1_i1	4.59726	4.72307	6.63572	4.76453	Q9K3U0	KPRS_STRCO	5.17e-152
DN1214_c0_g1_i5	7.53005	7.89831	7.6538	7.77869	Q9Y5Y0	FLVC1_HUMAN	1.08e-151
DN156216_c1_g2_i3	5.79601	5.92492	4.85179	4.93646	C5C8H9	PURA_MICLC	1.19e-151
DN132942_c0_g2_i2	8.69355	4.99765	7.91082	4.85623	P0AGH2	YHHJ_SHIFL	1.21e-151
DN163382_c0_g1_i1	4.77563	5.92492	4.16106	4.65498	Q86YT6	MIB1_HUMAN	1.43e-151
DN117020_c0_g2_i1	4.47008	4.44339	6.63572	5.9368	Q6A6G1	NUOD_CUTAK	1.95e-151
DN411926_c0_g1_i1	4.8469	5.29741	5.89906	5.13512	P97461	RS5_MOUSE	1.96e-151
DN239_c0_g1_i11	7.70683	8.14703	7.09315	6.95712	Q9GLK0	TGM1_CANLF	2.41e-151
DN415979_c0_g1_i1	5.39928	5.57338	6.0053	5.69594	Q00724	RET4_MOUSE	3.24e-151
DN470382_c0_g1_i1	5.81964	5.38837	4.16106	5.69594	Q91060	TBA_NOTVI	3.49e-151
DN112007_c0_g2_i1	5.46572	5.57338	5.89906	5.9368	P0AB70	PNTB_SHIFL	3.93e-151
DN21864_c0_g2_i1	7.17793	7.84725	7.90239	7.88653	Q5ZK01	PELO_CHICK	4.07e-151
DN1383_c0_g1_i2	7.28232	7.24692	7.35222	7.2805	Q5I0G4	GARS_RAT	4.17e-151
DN328040_c0_g1_i1	6.03339	4.9011	6.54946	4.76453	P37624	RBBA_ECOLI	4.99e-151
DN7053_c0_g1_i1	7.3429	7.5549	7.28855	7.47544	P49443	PPM1A_MOUSE	5.06e-151
DN312234_c0_g1_i1	4.16106	5.23156	5.69783	6.13761	Q6AAD7	RSMA_CUTAK	5.64e-151
DN8952_c0_g1_i3	5.12227	6.06014	5.33615	4.16106	B2RQR8	ECE2_MOUSE	6.48e-151
DN303388_c0_g1_i2	5.29047	5.59736	5.89906	5.9368	P21816	CDO1_RAT	7e-151
DN133781_c2_g1_i3	10.1647	5.38837	5.60631	4.76453	P04285	OPPD_SALTY	1.43e-150
DN113170_c0_g1_i2	5.46572	5.71006	5.60631	5.66199	Q9ZU52	ALFP3_ARATH	1.49e-150
DN24274_c0_g1_i1	9.15262	8.53537	9.1269	9.36384	Q27245	YH24_CAEEL	2.2e-150
DN3116_c0_g1_i4	7.83814	8.02617	8.43276	7.91863	Q8R1S9	S38A4_MOUSE	2.7e-150
DN41505_c0_g1_i5	4.8469	5.88864	4.56238	6.09036	O75334	LIPA2_HUMAN	3.28e-150
DN3043_c0_g1_i2	7.85373	8.18173	8.45016	8.96551	Q6ZM19	IF6_DANRE	3.74e-150
DN5695_c0_g1_i16	9.80275	9.77596	9.39835	9.11364	Q9Z0R4	ITSN1_MOUSE	3.91e-150
DN7972_c0_g1_i7	7.16957	8.16101	6.19389	6.06605	Q8WMN1	GTR5_SHEEP	4.36e-150
DN24068_c0_g1_i2	8.51946	7.88571	6.73635	9.16781	P10978	POLX_TOBAC	4.66e-150
DN451545_c0_g1_i1	4.91098	5.66633	4.95619	5.88102	A3MA02	ALLC_ACIBT	5.19e-150
DN13037_c0_g2_i4	5.12227	5.16055	5.50647	5.9368	Q6A6N2	RS3_CUTAK	5.97e-150
DN7496_c0_g1_i2	6.51743	6.40831	5.89906	7.32942	P42285	MTREX_HUMAN	6.05e-150
DN2332_c0_g1_i4	7.62423	6.63264	7.16611	7.62348	Q8I1F4	FBRL_DROER	6.74e-150
DN17539_c0_g1_i4	8.78817	8.8876	9.16245	9.21745	Q5WR10	DX39B_CANLF	1.57e-149
DN17539_c0_g1_i5	8.69643	8.83203	9.16946	9.15177	Q5WR10	DX39B_CANLF	1.57e-149
DN17439_c0_g1_i1	5.84281	6.68333	5.86146	5.38906	P52789	HXK2_HUMAN	1.69e-149
DN189764_c0_g1_i3	4.59726	5.77266	6.07136	4.51116	Q5F3X4	U5S1_CHICK	1.89e-149
DN21635_c1_g1_i3	5.36433	5.26507	5.78251	5.62698	P9WH43	RS1_MYCTU	2.08e-149
DN1591_c0_g1_i2	5.55806	6.79778	4.16106	6.49937	Q05688	IGF1R_BOVIN	3.05e-149
DN12419_c0_g1_i1	4.69429	5.85122	4.16106	5.38906	Q9IBG7	KCP_XENLA	3.09e-149
DN312055_c0_g1_i2	5.58714	5.77266	7.00025	6.26969	Q8G3N6	IMDH_BIFLO	3.16e-149
DN142684_c0_g2_i1	6.78567	5.04157	4.72681	4.16106	P03583	MVP_TMV	3.22e-149
DN15089_c0_g2_i6	5.46572	5.75217	5.82265	5.72891	P0CG51	UBB_RAT	4.5e-149
DN174319_c0_g2_i1	7.25102	4.64854	4.16106	4.93646	P37893	AMPN_CAUVC	5.85e-149
DN76648_c0_g1_i5	5.02386	6.13776	5.78252	4.16106	P9WP47	CSTA_MYCTU	6.8e-149
DN4865_c0_g1_i4	7.01918	6.49118	6.3057	6.33098	P50136	ODBA_MOUSE	7.55e-149
DN10297_c0_g1_i7	6.9522	7.90664	7.40117	7.12259	Q9NQX3	GEPH_HUMAN	8.36e-149
DN328225_c0_g2_i1	6.23251	4.16106	5.04733	4.76453	P29915	NQO3_PARDE	9.78e-149
DN48030_c1_g1_i1	5.46572	5.54886	5.4528	6.1606	P25737	LYSP_ECOLI	1.18e-148
DN2376_c0_g1_i1	12.281	12.634	13.2659	13.3328	Q90YS3	RS2_ICTPU	1.52e-148
DN3395_c0_g1_i1	8.48329	8.8472	9.49629	9.8279	Q5XIH7	PHB2_RAT	1.53e-148
DN13037_c0_g3_i1	5.55806	5.75217	5.129	6.58445	C5CC56	RS3_MICLC	1.69e-148
DN47171_c0_g1_i1	6.10947	6.0277	5.93551	6.22716	P46734	MP2K3_HUMAN	1.7e-148
DN5284_c0_g1_i9	6.9813	6.87775	7.70323	7.27051	Q8VDQ9	KRI1_MOUSE	1.99e-148
DN285779_c0_g1_i2	5.16741	6.81596	6.10312	5.96376	P37248	TRA8_CUPMC	2.37e-148
DN5504_c0_g1_i1	7.21088	8.13646	5.9709	6.83925	P39447	ZO1_MOUSE	2.77e-148
DN68035_c0_g1_i2	5.99354	6.15272	4.16106	4.93646	Q14571	ITPR2_HUMAN	4.49e-148
DN22273_c0_g1_i1	5.21031	4.9011	6.22276	7.2805	A0R0B0	ODP1_MYCS2	4.87e-148
DN306437_c0_g1_i1	5.25126	5.64381	4.16106	5.90923	Q60520	SIN3A_MOUSE	4.93e-148
DN6371_c0_g1_i11	6.81847	7.13678	6.251	6.29045	Q01063	PDE4D_MOUSE	1.17e-147
DN10261_c0_g1_i1	5.58714	6.70308	4.16106	5.62698	Q6DEZ2	F120A_XENTR	1.59e-147
DN7107_c0_g1_i3	5.32811	5.7928	5.20346	5.62698	Q1RGP0	FTSH_RICBR	1.63e-147
DN1045_c0_g1_i2	7.25891	6.86038	7.41314	7.49267	Q6PUR6	GPN2_DANRE	1.64e-147
DN76490_c2_g1_i1	5.32811	6.12261	5.04733	4.51116	C5C7X9	GYRA_MICLC	1.9e-147
DN133894_c0_g1_i1	7.517	4.16106	4.56238	4.16106	Q05884	AMY_STRLI	1.92e-147
DN106080_c0_g1_i1	5.25126	4.16106	6.61467	6.22716	Q6A8L2	HIS5_CUTAK	2.27e-147
DN9118_c0_g1_i1	9.01218	8.81228	8.95914	9.23023	P21670	PSA4_RAT	2.42e-147
DN11441_c0_g2_i1	7.49055	7.76705	6.95136	7.1114	Q8WPW2	PDX1_SUBDO	2.65e-147
DN81520_c0_g1_i1	5.16741	4.95099	4.16106	6.51682	Q89L59	QUEA_BRADU	2.8e-147
DN7002_c0_g1_i1	5.52816	5.85122	6.19389	5.47449	O14981	BTAF1_HUMAN	5.3e-147
DN34363_c0_g1_i1	6.14586	6.01115	5.60631	6.2486	Q5ZKY2	ATG7_CHICK	6.1e-147
DN55539_c0_g1_i1	5.88783	5.75217	5.33615	4.51116	Q6AEU4	GLGB_LEIXX	7.33e-147
DN9450_c0_g1_i3	4.91098	5.8126	4.16106	5.90923	Q9Y297	FBW1A_HUMAN	1.25e-146
DN14783_c0_g1_i2	5.29047	5.32869	5.74095	5.43267	Q3SYT8	NCPR_BOVIN	1.53e-146
DN102143_c0_g1_i1	5.07456	5.44468	6.1341	5.2452	P19253	RL13A_MOUSE	1.54e-146
DN141172_c0_g1_i1	6.16366	6.50261	6.527	7.5097	P25787	PSA2_HUMAN	2.84e-146
DN84953_c0_g1_i1	6.72919	5.19676	6.07136	4.65498	P97275	ADAS_CAVPO	3.38e-146
DN4487_c0_g1_i1	5.6431	5.7313	6.07136	6.13761	Q5EA95	IFT57_BOVIN	3.58e-146
DN121227_c0_g2_i1	4.77563	5.16055	6.59328	5.2956	Q6AAC8	RL25_CUTAK	4.87e-146
DN262776_c0_g1_i1	6.10947	5.57338	5.93551	6.76912	Q8Y664	CARA_LISMO	5.71e-146
DN14884_c0_g1_i2	5.81964	5.44468	5.69783	5.72891	B8H444	FTSH_CAUVN	5.86e-146
DN38079_c0_g1_i1	5.07456	5.32869	6.19389	5.5147	P9WQM7	ANSP2_MYCTU	5.87e-146
DN2421_c0_g1_i3	9.212	8.47798	9.63175	8.74439	Q9JM53	AIFM1_RAT	7.22e-146
DN77060_c0_g1_i1	5.16741	5.62083	4.56238	5.19187	Q801P7	ARP3A_XENLA	7.42e-146
DN15047_c0_g1_i1	6.77456	5.85122	6.90067	6.29045	Q2KJJ0	PRP6_BOVIN	8.47e-146
DN4621_c0_g1_i2	8.53881	8.66588	8.56633	8.88369	P49760	CLK2_HUMAN	9.93e-146
DN4621_c0_g1_i4	8.20081	8.11507	8.59266	8.25122	P49760	CLK2_HUMAN	9.93e-146
DN2667_c0_g1_i1	5.99354	6.66328	6.22276	6.11421	Q9DC29	ABCB6_MOUSE	1.13e-145
DN9211_c0_g1_i5	8.30254	9.41091	9.26738	8.94704	Q01082	SPTB2_HUMAN	1.39e-145
DN1719_c0_g1_i7	7.86403	7.31792	7.83315	8.21041	Q8C1A5	THOP1_MOUSE	1.49e-145
DN4237_c0_g1_i1	7.61203	7.47274	7.07809	7.40431	Q6GQE7	ATG3_XENLA	1.95e-145
DN30372_c0_g1_i5	5.6431	7.06326	4.16106	5.66199	Q60HE2	ODO1_MACFA	2.09e-145
DN2853_c0_g1_i3	6.31369	6.43252	6.03877	6.63303	Q62717	CAPS1_RAT	2.16e-145
DN2853_c0_g1_i15	5.25126	5.90691	5.50647	5.2956	Q62717	CAPS1_RAT	2.16e-145
DN406081_c0_g1_i5	6.16366	6.15272	5.39618	5.47449	P9WIA3	PHOL_MYCTU	2.58e-145
DN7047_c0_g1_i1	8.3435	7.86019	8.37929	9.08858	Q9CQA3	SDHB_MOUSE	3.6e-145
DN2705_c0_g1_i1	5.58714	6.64293	6.48092	6.56786	Q9DE14	ATR_XENLA	4.13e-145
DN7917_c0_g1_i2	7.82765	9.20268	8.93467	9.01364	P58005	SESN3_HUMAN	4.53e-145
DN4492_c0_g1_i1	7.12699	7.27316	7.48293	6.93178	P59325	IF5_MOUSE	4.58e-145
DN16806_c0_g1_i2	6.01363	5.38837	5.74095	6.09036	C5CCH2	SYDND_MICLC	4.98e-145
DN1679_c0_g1_i1	7.30534	7.3855	6.98414	7.04231	Q6NV26	SDA1_DANRE	5.07e-145
DN19924_c0_g1_i2	8.90204	8.95317	9.24435	9.03129	O60762	DPM1_HUMAN	5.78e-145
DN1443_c0_g1_i8	9.99329	10.0314	10.2656	9.64341	O00567	NOP56_HUMAN	9.95e-145
DN350674_c0_g2_i2	5.4974	4.64854	5.78252	6.2486	Q6A661	GRPE_CUTAK	1.09e-144
DN6457_c0_g1_i1	5.88783	6.91185	7.09315	6.26969	P12007	IVD_RAT	1.5e-144
DN7189_c0_g1_i2	5.67005	6.60129	4.56238	6.56786	Q9TT38	PA24A_RABIT	1.63e-144
DN25031_c0_g1_i1	5.67005	5.97738	7.01617	5.62698	Q6DRC3	CF298_DANRE	1.65e-144
DN147816_c0_g1_i1	5.07456	5.59736	5.27216	5.59082	A0JWV0	GLGC_ARTS2	1.69e-144
DN242181_c0_g1_i1	4.8469	5.62083	5.60631	5.76095	Q6A7A2	DNLJ_CUTAK	1.75e-144
DN78009_c0_g2_i2	7.04693	5.19676	4.16106	4.16106	A1B8N9	ATPG_PARDP	1.9e-144
DN138056_c1_g1_i1	6.32934	4.84725	5.20346	4.51116	D5AQI9	RPOD_RHOCB	2.05e-144
DN3408_c0_g1_i1	12.2053	12.3157	12.579	12.6209	P62909	RS3_RAT	2.08e-144
DN116236_c0_g1_i1	4.77563	4.64854	4.95619	6.33099	C5CAA3	MQO_MICLC	2.27e-144
DN63119_c0_g1_i1	12.7517	12.6873	13.4344	13.6691	B5DGL6	RS3A_SALSA	2.64e-144
DN35792_c0_g1_i1	4.77563	5.35898	6.75561	6.35079	P9WQG1	ACDP_MYCTU	3e-144
DN43434_c0_g5_i1	5.21031	4.44339	5.55755	6.46376	A0R574	CLPC1_MYCS2	3.02e-144
DN2328_c0_g1_i4	7.29003	7.60714	7.1228	6.82551	Q9D1Q6	ERP44_MOUSE	3.13e-144
DN100754_c0_g2_i1	6.05285	5.7928	6.84805	6.04126	Q8L164	TREP_THEBR	4.46e-144
DN66808_c0_g1_i2	8.59227	7.29891	6.16435	6.13761	Q4R5V1	TEKT2_MACFA	6.23e-144
DN6258_c0_g1_i2	7.9916	8.15404	7.33971	7.80643	Q5ZLX2	IF2A_CHICK	7.51e-144
DN14398_c0_g1_i2	5.39927	5.97738	5.04733	5.38906	Q08DM7	SEPT3_BOVIN	8.32e-144
DN77709_c0_g1_i1	5.55806	5.52376	4.16106	5.07429	Q9VMW9	GMDS_DROME	1.12e-143
DN90474_c0_g1_i1	5.72211	6.53632	5.20346	4.16106	Q99615	DNJC7_HUMAN	1.18e-143
DN466616_c0_g1_i1	5.7719	4.44339	6.03877	5.59082	Q59603	MTB1_NEIGO	1.19e-143
DN18639_c0_g1_i2	6.21564	5.29741	4.16106	5.79214	A2VD92	DDX1_XENLA	1.38e-143
DN2530_c0_g1_i16	7.96316	9.09063	7.87682	8.23605	P08120	CO4A1_DROME	1.43e-143
DN5747_c0_g1_i5	9.3239	9.12126	8.84121	8.46573	P24798	AT1A3_CHICK	1.53e-143
DN2808_c0_g1_i2	5.16741	11.1728	5.55755	6.74004	Q3T052	ITIH4_BOVIN	1.83e-143
DN253929_c0_g1_i2	6.09088	5.99439	4.56238	4.16106	Q60HE9	MA2B1_MACFA	1.9e-143
DN346627_c0_g1_i1	4.91098	5.26507	5.12901	5.96376	P43329	HRPA_ECOLI	2.46e-143
DN7973_c0_g1_i2	7.21088	6.70308	7.22185	6.79761	Q9NR19	ACSA_HUMAN	3.73e-143
DN45254_c1_g3_i2	6.19855	5.54886	4.16106	4.16106	P45127	ETTA_HAEIN	5.47e-143
DN262315_c0_g1_i1	5.39928	5.7313	6.0053	6.38953	Q6A8H6	KGUA_CUTAK	6.23e-143
DN13300_c0_g1_i1	5.69638	5.90691	4.16106	4.93646	P24928	RPB1_HUMAN	6.4e-143
DN54821_c0_g1_i1	4.69429	4.95099	6.73635	6.63303	Q9I702	BAUC_PSEAE	8.61e-143
DN18978_c0_g1_i3	6.59602	7.23362	5.55755	6.63303	Q09XV5	CHD8_MOUSE	9.24e-143
DN14984_c0_g1_i3	5.67005	5.29741	5.60631	5.59082	A0A0D2YG02	FUB7_FUSO4	9.65e-143
DN43424_c0_g1_i1	7.99629	7.85157	7.66382	7.61565	Q5RKI0	WDR1_RAT	1.33e-142
DN449483_c0_g1_i1	5.61547	5.62083	4.16106	4.85623	P18654	KS6A3_MOUSE	1.46e-142
DN259107_c0_g1_i2	5.36433	5.83207	5.33615	5.88102	Q6A9H8	OBG_CUTAK	1.68e-142
DN7040_c0_g1_i3	8.76646	7.88149	7.8153	8.89337	Q9PVK2	ENOA_ALLMI	1.72e-142
DN4851_c0_g2_i1	7.60589	7.36739	8.37322	8.34845	P60901	PSA6_RAT	2.85e-142
DN2188_c0_g1_i1	9.51485	8.60338	9.03015	9.89683	Q8UWJ4	DLLD_DANRE	3.54e-142
DN986_c0_g1_i4	7.70683	7.05569	7.79722	7.8537	Q9NZ01	TECR_HUMAN	3.59e-142
DN14985_c0_g1_i1	6.01363	6.13776	5.39618	5.13512	Q05975	RAB2_LYMST	5.64e-142
DN49588_c0_g1_i4	5.55806	5.64381	4.16106	5.85212	A2CG49	KALRN_MOUSE	6.88e-142
DN81345_c0_g1_i12	6.16366	6.34576	5.78252	6.38953	O93309	SMC3_XENLA	7.35e-142
DN81345_c0_g1_i2	6.31369	6.52517	5.4528	6.48168	O93309	SMC3_XENLA	7.35e-142
DN3503_c0_g1_i3	6.91241	6.54737	6.79334	7.10012	P79732	RIR1_DANRE	8.68e-142
DN55629_c0_g1_i2	6.54414	7.35519	6.59328	6.99427	Q13485	SMAD4_HUMAN	9.12e-142
DN102177_c0_g1_i1	4.69429	5.94266	5.86146	5.5147	A0R5D9	TOP1_MYCS2	9.79e-142
DN69712_c0_g1_i8	5.52816	6.39604	4.85179	4.85623	P51830	ADCY9_MOUSE	9.84e-142
DN16648_c0_g1_i2	5.97312	5.41692	6.10312	5.43267	Q9WTX6	CUL1_MOUSE	1.25e-141
DN452415_c0_g1_i1	4.69429	6.01115	4.56238	5.85212	A5E964	PROB_BRASB	1.44e-141
DN18138_c0_g1_i1	5.95235	6.53632	6.22276	6.82551	Q5XGB9	AMPL_XENTR	1.76e-141
DN2114_c0_g1_i1	11.664	11.9315	11.8972	11.9954	P12261	EF1G_ARTSA	1.79e-141
DN9595_c0_g1_i1	7.8329	7.3613	8.96721	8.15769	O35567	PUR9_RAT	1.96e-141
DN6005_c0_g1_i1	9.21401	9.35139	9.89936	9.50093	P28656	NP1L1_MOUSE	2.11e-141
DN13472_c0_g1_i1	8.28353	7.40339	7.68366	7.5097	Q8BTU1	CFA20_MOUSE	2.21e-141
DN312841_c0_g1_i1	5.79601	5.87008	4.95619	5.66199	C5CBZ4	GUAA_MICLC	2.82e-141
DN5489_c0_g1_i1	6.50387	6.54737	6.91777	7.16647	Q6NS26	CDKAL_XENLA	3.93e-141
DN179844_c0_g2_i1	5.39928	5.87008	6.16435	6.58445	Q6A9J7	Y813_CUTAK	4.35e-141
DN106134_c1_g1_i1	5.39928	5.12275	5.04733	5.66199	P08499	DHOM_CORGL	4.49e-141
DN5102_c0_g2_i1	9.74155	9.97439	11.5287	10.5797	P03914	NU4M_EMEND	4.68e-141
DN19111_c0_g1_i7	5.74727	5.57338	4.16106	5.0085	O14980	XPO1_HUMAN	4.77e-141
DN2509_c0_g1_i5	7.44303	10.1268	10.3153	9.57293	Q7T070	RHBG_DANRE	5.21e-141
DN103760_c0_g1_i1	5.52816	5.59736	4.56238	4.16106	Q3SWY2	ILK_BOVIN	5.56e-141
DN38806_c0_g1_i1	6.21564	5.87008	5.82265	5.0085	O00625	PIR_HUMAN	7.42e-141
DN192383_c1_g2_i1	5.58714	5.12275	6.54946	6.16059	P9WMR1	HELY_MYCTU	7.45e-141
DN2992_c0_g1_i3	7.27456	7.77619	8.06209	7.50121	O42254	IF2B1_CHICK	7.69e-141
DN28069_c0_g1_i1	6.41948	6.73219	5.78251	6.06605	Q4QQY7	TGT_XENLA	8.55e-141
DN240536_c0_g1_i1	5.21031	5.47171	5.65301	5.0085	P51410	RL9_MOUSE	9.5e-141
DN318813_c0_g1_i1	4.69429	5.08318	5.9709	6.40848	Q6A7E7	TIG_CUTAK	9.98e-141
DN206922_c0_g3_i1	4.91098	4.44339	5.20346	7.1447	P38487	CREA_BACB0	1.06e-140
DN149505_c0_g1_i1	5.39928	4.78843	6.50416	5.9368	Q6A9H6	PROA_CUTAK	1.13e-140
DN2076_c0_g1_i2	6.1278	5.94266	5.9709	6.61703	Q61425	HCDH_MOUSE	1.14e-140
DN171535_c0_g1_i3	5.61547	7.40339	7.15182	6.79761	Q6DCG4	RHBGB_XENLA	1.35e-140
DN65622_c0_g1_i1	5.52816	6.23901	5.86146	4.16106	P9WGZ9	RNJ_MYCTU	1.59e-140
DN140477_c2_g2_i1	6.70593	4.16106	4.72681	4.93646	A1AZW1	RUVB_PARDP	1.64e-140
DN282819_c0_g1_i2	5.46572	4.44339	5.9709	5.55343	A5E8G8	MNMG_BRASB	1.69e-140
DN56536_c0_g4_i1	5.93122	5.94266	7.07809	6.35079	Q8G5F0	ARGJ_BIFLO	1.88e-140
DN145481_c0_g1_i1	5.36433	5.19676	4.72681	5.82251	Q6A7P6	PNP_CUTAK	1.93e-140
DN171535_c0_g1_i5	5.58714	7.27316	6.84805	6.33099	Q6DCG4	RHBGB_XENLA	2.04e-140
DN51367_c0_g1_i3	5.99354	4.72307	5.93551	6.11421	P0CD55	NU2C2_WHEAT	2.67e-140
DN20792_c0_g1_i7	5.55806	5.47171	4.56238	4.85623	Q86XP1	DGKH_HUMAN	2.78e-140
DN40801_c0_g1_i2	7.17793	7.27964	6.45727	5.72891	O95071	UBR5_HUMAN	3.05e-140
DN22357_c0_g1_i2	8.02867	7.09314	7.43679	7.05407	P38117	ETFB_HUMAN	3.36e-140
DN246743_c0_g1_i1	5.43304	5.23156	6.48092	5.76095	B7LRJ2	NANT_ESCF3	4.47e-140
DN5324_c0_g1_i9	5.46572	7.3613	7.01617	6.55106	Q8N695	SC5A8_HUMAN	4.77e-140
DN741_c0_g2_i1	8.35811	8.20553	9.42786	9.14908	Q9BZE4	NOG1_HUMAN	5.44e-140
DN50052_c0_g4_i1	6.19855	4.72307	5.04733	5.0085	P29933	COBS_SINSX	6.29e-140
DN30105_c0_g1_i1	5.02386	6.61182	4.16106	5.07429	Q13233	M3K1_HUMAN	6.52e-140
DN22772_c0_g1_i2	5.46572	5.7928	4.16106	4.16106	O70511	ANK3_RAT	6.57e-140
DN564_c0_g1_i9	8.55157	10.9498	7.07809	9.26543	Q64739	COBA2_MOUSE	7.6e-140
DN9371_c0_g1_i9	4.59726	5.90691	5.04733	4.16106	P17948	VGFR1_HUMAN	9.39e-140
DN117633_c3_g1_i2	5.07456	5.32869	5.86146	5.07429	P04441	HG2A_MOUSE	9.71e-140
DN34510_c0_g2_i8	5.7719	6.15272	4.95619	5.59082	Q9EPU0	RENT1_MOUSE	9.79e-140
DN5893_c0_g1_i2	5.32811	6.01115	4.16106	5.38906	P00535	ERBB_AVIER	1.06e-139
DN38643_c0_g1_i1	6.62123	7.6723	8.21933	6.96961	P00636	F16P1_PIG	1.27e-139
DN98983_c0_g1_i1	6.81847	5.92492	6.95136	5.43267	P40938	RFC3_HUMAN	1.32e-139
DN56727_c0_g1_i1	5.55806	5.41692	5.65301	4.16106	Q11QA6	RPOC_CYTH3	1.6e-139
DN212119_c0_g1_i1	6.16366	6.06014	6.07136	5.88102	A6QM00	GADL1_BOVIN	1.66e-139
DN17174_c0_g1_i1	5.25126	5.32869	5.89906	5.38906	C5CAX2	CLPX_MICLC	1.84e-139
DN61_c0_g1_i3	6.94236	7.70139	7.47154	7.84035	O43432	IF4G3_HUMAN	1.93e-139
DN15728_c0_g1_i1	7.93414	8.20889	8.26595	8.35315	Q9Z2U1	PSA5_MOUSE	3.04e-139
DN1774_c0_g1_i3	5.49741	5.77266	6.38366	5.62698	P19623	SPEE_HUMAN	3.13e-139
DN6494_c0_g1_i1	6.68226	6.96147	6.50416	5.96376	P07857	NLTP_BOVIN	3.92e-139
DN10444_c0_g2_i1	5.43304	5.87008	5.33615	5.79214	P52154	RHO_MICLU	5.39e-139
DN7975_c0_g1_i1	8.18039	8.2682	8.05452	8.32476	Q9CWH6	PSMA8_MOUSE	5.55e-139
DN490373_c0_g1_i1	4.9696	4.84725	5.20346	5.99014	P53003	PCCB_SACEN	1.19e-138
DN53457_c0_g1_i1	9.10803	9.35897	9.97723	9.15177	Q16543	CDC37_HUMAN	1.35e-138
DN1762_c0_g1_i1	7.67788	7.45572	7.04748	7.2401	Q5T280	CI114_HUMAN	1.44e-138
DN182321_c1_g1_i2	4.47008	5.49806	7.09316	6.66448	P11652	MUTA_PROFR	1.54e-138
DN11561_c0_g1_i9	5.79601	5.8126	4.72681	5.2452	O61491	FLOT1_DROME	2.22e-138
DN3634_c0_g1_i12	4.69429	7.44426	5.04733	4.16106	Q5NVM9	HSP7C_PONAB	3.21e-138
DN2058_c0_g1_i3	6.81847	6.9034	6.83006	6.89288	O54889	RPA1_RAT	3.36e-138
DN1207_c0_g1_i2	6.87145	6.71285	7.22185	7.16647	Q8JZM7	CDC73_MOUSE	4.97e-138
DN321451_c0_g1_i2	5.07456	6.01115	4.16106	6.22716	Q4R562	ARRB1_MACFA	5.34e-138
DN43242_c0_g1_i1	4.91098	4.9011	6.16435	6.26969	Q6A8K7	RUVB_CUTAK	5.35e-138
DN2992_c0_g1_i9	7.09198	7.99916	8.192	7.36736	O42254	IF2B1_CHICK	5.38e-138
DN67917_c1_g1_i1	5.52816	5.19676	6.19389	5.2452	P94132	ETFD_ACIAD	6.33e-138
DN122_c0_g1_i6	5.93122	6.75125	5.55755	6.44559	P0CG70	UBI4P_NEUCR	6.58e-138
DN242844_c0_g1_i2	7.11832	4.78843	5.20346	4.85623	Q3J5H6	GLND_RHOS4	6.84e-138
DN1443_c0_g1_i13	10.1333	9.93743	10.4173	9.9301	Q5RA29	NOP56_PONAB	7.38e-138
DN13271_c0_g1_i2	6.32934	6.68333	6.79334	6.76912	Q5R587	RPAB1_PONAB	7.9e-138
DN1597_c0_g1_i1	5.79601	5.97738	7.04748	6.78344	Q9V3H2	PSDE_DROME	8.86e-138
DN1597_c0_g1_i2	6.79669	6.0277	6.65646	6.11421	Q9V3H2	PSDE_DROME	8.86e-138
DN324_c0_g1_i4	8.96294	8.17486	7.90239	9.06022	P38542	RAN_BRUMA	1.2e-137
DN53343_c1_g1_i1	4.16106	4.78843	6.54946	4.65498	A1SCM2	GYRA_NOCSJ	1.45e-137
DN13468_c0_g2_i1	5.12227	6.22503	6.35819	6.44559	Q6NZQ2	DDX31_MOUSE	1.49e-137
DN318220_c0_g1_i1	7.35765	7.78527	7.72253	7.55139	Q9D2G2	ODO2_MOUSE	1.68e-137
DN2992_c0_g1_i6	7.31293	7.99526	8.24616	7.44032	O42254	IF2B1_CHICK	2.78e-137
DN15218_c0_g1_i1	8.06033	8.74673	9.29005	8.65231	Q5ZKX9	ERD22_CHICK	3.06e-137
DN234373_c0_g1_i2	6.47633	4.78843	4.72681	5.47449	A1B015	RPOB_PARDP	3.31e-137
DN326_c0_g1_i2	9.66011	9.69808	10.4464	10.6336	P32429	RL7A_CHICK	3.44e-137
DN2768_c0_g1_i2	4.59726	7.48956	6.98414	7.49267	A1E295	CATB_PIG	3.69e-137
DN2074_c0_g1_i2	12.0739	12.0683	12.1396	12.5205	Q803F6	RSSA_DANRE	3.85e-137
DN310836_c0_g1_i1	6.50387	4.55971	5.12901	4.16106	A3SR25	XSC_ROSNI	4.29e-137
DN260790_c0_g1_i1	5.32811	5.54886	7.06287	5.82251	Q6AA77	OTC_CUTAK	5.17e-137
DN257291_c0_g1_i1	5.6431	5.8126	4.16106	4.51116	E7F9L8	MYO1D_DANRE	5.29e-137
DN431679_c0_g1_i1	4.16106	4.64854	6.1341	5.72891	P78611	CHSD_EMENI	5.33e-137
DN8640_c0_g1_i2	6.79669	6.16751	6.59328	6.55106	Q9H1D9	RPC6_HUMAN	6.1e-137
DN1390_c0_g1_i1	7.2351	7.42689	7.54945	7.50121	Q66JI9	COPG2_XENTR	7.51e-137
DN48030_c0_g1_i2	5.12227	4.78843	5.04733	6.51682	P25737	LYSP_ECOLI	7.74e-137
DN181491_c0_g1_i1	8.10003	8.78326	8.36713	8.1577	O00267	SPT5H_HUMAN	8.49e-137
DN156450_c0_g1_i1	4.16106	5.44468	6.59328	5.19187	Q6AAU8	GPMA_CUTAK	9.99e-137
DN117795_c0_g1_i1	7.10959	6.25285	7.28855	5.2956	P33527	MRP1_HUMAN	1e-136
DN6709_c0_g1_i2	6.03339	5.94266	6.1341	6.72526	Q5ZIP4	XRN2_CHICK	1.05e-136
DN192237_c0_g1_i1	5.67005	5.8126	6.527	5.99014	P09528	FRIH_MOUSE	1.2e-136
DN247337_c0_g1_i2	6.69415	4.95099	5.27216	4.51116	Q9KWU4	PYC_BACSU	3.09e-136
DN197001_c0_g1_i1	5.95235	5.23156	5.12901	5.69594	P24928	RPB1_HUMAN	3.2e-136
DN22311_c0_g2_i3	5.86553	5.83207	5.50647	5.82251	B8HD12	EFG_PSECP	3.73e-136
DN223947_c0_g1_i2	5.36433	5.29741	5.82265	5.0085	P24049	RL17_RAT	4.01e-136
DN2722_c0_g1_i5	6.8505	7.13678	7.58157	6.22716	Q6GN02	THILB_XENLA	4.08e-136
DN10014_c0_g1_i1	6.26559	4.16106	4.16106	4.16106	P30738	RDRP_TMVKR	4.83e-136
DN40589_c0_g1_i1	6.82923	4.16106	5.129	4.76453	Q6A5X5	G6PI_CUTAK	4.86e-136
DN30252_c0_g1_i2	5.55806	6.94513	4.56238	6.2486	Q3T1L0	A16A1_RAT	6.6e-136
DN106134_c0_g1_i1	5.32811	5.29741	5.4528	6.29045	A0R220	THRC_MYCS2	7.8e-136
DN80644_c0_g3_i4	6.05285	5.94266	6.07136	5.99014	P43249	GRK5_BOVIN	7.92e-136
DN60362_c0_g1_i1	4.9696	6.29348	5.74095	4.65498	Q8WUQ7	CATIN_HUMAN	8.8e-136
DN99436_c0_g3_i2	5.36433	5.47171	5.50647	5.19187	D4HA34	FTSH_PROAS	9.3e-136
DN16377_c0_g1_i1	5.7719	5.59736	4.16106	4.16106	Q9JID6	ACSL1_CAVPO	1.18e-135
DN10533_c0_g1_i2	7.00981	6.85161	6.77461	7.47544	Q68FK8	DHX9_XENLA	1.49e-135
DN54515_c0_g1_i6	5.88783	6.52517	6.73635	6.26969	Q9NQH7	XPP3_HUMAN	1.56e-135
DN10167_c0_g1_i2	5.25126	5.96014	4.16106	4.65498	P18910	ANPRA_RAT	1.8e-135
DN2768_c0_g1_i1	6.62123	7.66739	6.91777	7.1114	A1E295	CATB_PIG	1.86e-135
DN3011_c0_g1_i1	6.75206	6.61182	6.71681	7.2805	Q8VBW6	ULA1_MOUSE	2.14e-135
DN5529_c0_g1_i31	5.67005	7.1998	4.56238	5.69594	O15230	LAMA5_HUMAN	3.1e-135
DN1338_c0_g1_i9	6.54414	7.68692	5.74095	6.33098	Q66JF3	MKNK1_XENTR	4.2e-135
DN147387_c0_g1_i4	7.29771	6.92859	7.90239	6.51682	Q5R5E7	3HIDH_PONAB	4.31e-135
DN25915_c0_g2_i2	7.72957	4.55971	5.9709	4.65498	B1K3Y3	UGL_BURCC	4.32e-135
DN269426_c1_g1_i1	5.02386	5.16055	5.04733	6.46376	Q89W63	DNAA_BRADU	6.48e-135
DN191433_c0_g1_i1	5.32811	4.16106	5.12901	7.35797	B2GIL1	EFG_KOCRD	7e-135
DN19135_c0_g2_i1	6.07201	4.16106	4.16106	5.47449	P10486	T1R1_ECOLX	7.34e-135
DN160299_c0_g1_i3	6.43392	4.16106	5.12901	4.16106	D5AKX8	XSC_RHOCB	7.63e-135
DN73936_c0_g1_i1	7.01918	4.44339	4.72681	4.16106	A4IJI9	RL3_GEOTN	7.96e-135
DN19064_c1_g1_i2	6.07201	5.12275	5.27216	4.76453	A1R8M1	CH602_PAEAT	8.8e-135
DN7981_c0_g1_i4	6.10947	7.6426	5.129	5.62698	Q92896	GSLG1_HUMAN	9.61e-135
DN21897_c0_g2_i1	5.07456	6.15272	4.16106	5.55343	Q6AY57	WIPI2_RAT	1.14e-134
DN30396_c0_g1_i3	5.67005	6.16751	5.82265	5.69594	Q8BJ03	COX15_MOUSE	1.16e-134
DN654_c0_g1_i8	6.37518	7.71096	7.42502	6.81163	Q9QXN5	MIOX_MOUSE	1.38e-134
DN716_c0_g2_i1	7.10959	8.91254	6.3057	6.04126	P51907	EAA3_RAT	1.46e-134
DN414787_c0_g1_i1	5.7719	5.49806	5.27216	4.16106	P51812	KS6A3_HUMAN	1.64e-134
DN8885_c0_g1_i1	6.26559	6.18214	6.73635	6.06605	Q1JQD2	GRWD1_BOVIN	1.7e-134
DN2768_c0_g1_i5	9.44148	9.54048	9.95714	10.4655	A1E295	CATB_PIG	1.77e-134
DN133123_c0_g1_i2	6.54414	6.77936	6.79334	7.00644	Q90WU3	DDX1_CHICK	1.77e-134
DN124145_c0_g1_i2	4.47008	5.85123	6.67687	6.20535	P29422	CATA_MICLU	2.41e-134
DN117078_c0_g1_i1	5.6431	5.8126	6.48092	6.71031	O07631	TYPA_BACSU	2.57e-134
DN236431_c0_g1_i1	4.77563	5.59736	5.33615	5.90923	O34245	DCUA_WOLSU	2.67e-134
DN261_c0_g1_i2	5.95235	13.3302	9.36519	11.4501	Q00685	CO3_LETCA	3.49e-134
DN133896_c0_g1_i1	6.78567	4.44339	5.39618	5.2956	P29968	XOXF_PARDE	3.5e-134
DN34510_c0_g1_i3	5.7719	6.74175	4.72681	6.09036	Q98TR3	RENT1_TAKRU	4.9e-134
DN53008_c0_g1_i1	4.16106	5.57338	5.93551	5.0085	Q6A5L3	3MGH_CUTAK	5.09e-134
DN172487_c0_g1_i1	4.9696	5.29741	6.61467	5.0085	C5C9S6	SYP_MICLC	6.77e-134
DN425194_c0_g1_i1	5.61547	6.07605	6.77461	6.33099	P29391	FRIL1_MOUSE	7.72e-134
DN71_c0_g1_i2	7.7352	8.34363	7.94402	7.87349	O93401	LDHA_RHINC	8.77e-134
DN242075_c0_g1_i2	6.63366	6.73219	7.3769	7.22981	A7RUD5	NUBP1_NEMVE	9.09e-134
DN13527_c0_g1_i1	6.1278	6.53632	5.69783	4.85623	Q16822	PCKGM_HUMAN	1.3e-133
DN300787_c0_g2_i1	4.69429	4.78843	4.95619	6.26969	Q82I33	HUTH_STRAW	1.33e-133
DN60975_c0_g1_i1	6.10947	6.70308	6.35819	6.58445	P70388	RAD50_MOUSE	1.49e-133
DN4519_c0_g1_i2	6.54414	7.3242	7.85951	7.04231	Q8R081	HNRPL_MOUSE	1.5e-133
DN3642_c0_g1_i3	10.5385	10.7057	10.8089	11.3342	P82013	VDAC2_MELGA	1.57e-133
DN534_c0_g1_i15	5.90972	6.29348	5.20346	5.85212	O88664	TAOK1_RAT	2.09e-133
DN399703_c0_g1_i1	5.52816	5.66633	6.10312	5.43267	A6W5H6	SYK_KINRD	2.17e-133
DN407364_c0_g1_i1	6.5573	4.64854	4.16106	4.16106	Q6A6M1	SYE_CUTAK	3.32e-133
DN21202_c0_g1_i2	6.62123	7.25353	7.40117	6.82551	A2BIM8	MUP18_MOUSE	3.34e-133
DN21202_c0_g1_i9	6.67027	7.47274	7.22185	6.95712	A2BIM8	MUP18_MOUSE	3.34e-133
DN34677_c0_g1_i3	8.47327	5.44468	7.57094	5.99014	P52070	PHAC_METEX	3.8e-133
DN6040_c0_g1_i2	6.78567	6.34576	7.01617	7.26044	Q9QXK7	CPSF3_MOUSE	3.98e-133
DN9909_c0_g2_i2	9.16303	9.57731	9.51566	9.4095	Q61687	ATRX_MOUSE	4.08e-133
DN47258_c0_g1_i1	5.07456	5.8126	5.20346	6.22716	Q14203	DCTN1_HUMAN	4.42e-133
DN65488_c0_g2_i1	4.9696	5.77266	5.4528	5.19187	P73138	FRMA_SYNY3	5.29e-133
DN164049_c2_g1_i3	4.77563	5.44468	5.50647	5.72891	C5C7X8	GYRB_MICLC	5.54e-133
DN212786_c0_g1_i1	4.9696	5.16055	5.74095	5.82251	P42628	DLST_ECOLI	5.77e-133
DN191957_c0_g1_i1	5.52816	4.95099	6.98414	7.1447	Q82I33	HUTH_STRAW	6.26e-133
DN4641_c0_g1_i3	6.78567	5.75217	6.79334	6.96961	Q9H3F6	BACD3_HUMAN	7.01e-133
DN100172_c0_g1_i1	4.59726	5.41692	5.4528	5.9368	Q6A7F1	CLPX_CUTAK	9.24e-133
DN1557_c0_g1_i2	8.168	9.10151	8.56633	8.87068	Q5R6T1	PDIA6_PONAB	1.06e-132
DN87700_c0_g1_i2	4.16106	4.55971	4.95619	6.79761	Q9Y8G8	TOP2_PENCH	1.09e-132
DN2074_c0_g1_i1	11.8825	11.7875	11.9676	12.2944	Q6P8D1	RSSA_XENTR	1.76e-132
DN286882_c0_g1_i1	5.16741	5.64381	5.55755	5.0085	P04939	MUP3_MOUSE	1.83e-132
DN214876_c0_g1_i2	4.16106	5.88864	4.16106	5.85212	B0VD51	ISCS_ACIBY	1.95e-132
DN2234_c0_g1_i1	8.93403	8.34974	9.05685	8.95322	P63039	CH60_RAT	2.59e-132
DN500250_c0_g1_i1	5.25126	5.77266	5.93551	5.5147	P49817	CAV1_MOUSE	2.83e-132
DN5072_c0_g2_i9	6.41948	5.6884	4.16106	5.34345	Q86VS8	HOOK3_HUMAN	2.85e-132
DN75477_c0_g1_i3	5.39928	6.07605	5.39618	6.46376	Q6A6X6	METN_CUTAK	3.28e-132
DN5808_c0_g1_i1	6.07201	5.77266	6.95136	5.85212	P15650	ACADL_RAT	3.32e-132
DN94201_c0_g1_i1	6.3448	4.16106	5.9709	4.16106	P43089	HEM1_PARDP	3.49e-132
DN103610_c0_g1_i1	5.4974	6.01115	7.23544	6.18317	Q8VC12	HUTU_MOUSE	3.73e-132
DN5011_c0_g1_i3	7.27456	7.22692	6.79334	6.33098	Q8K301	DDX52_MOUSE	3.81e-132
DN382901_c0_g1_i2	4.9696	5.47171	5.69783	5.0085	P49817	CAV1_MOUSE	3.97e-132
DN279995_c0_g1_i1	6.8818	5.12275	4.56238	4.93646	P0CH00	RIR1B_MYCS2	4.01e-132
DN146271_c0_g1_i1	5.29047	5.44468	6.0053	5.55343	Q9XA76	APEB_STRCO	5.16e-132
DN36643_c0_g1_i1	6.40488	4.64854	5.04733	4.16106	Q165J6	RF2_ROSDO	5.73e-132
DN287950_c0_g2_i1	6.57033	4.16106	4.16106	4.16106	A1B945	MURI_PARDP	5.79e-132
DN476860_c0_g1_i1	5.16741	5.8126	5.60631	5.13512	P62718	RL18A_RAT	6.38e-132
DN4590_c0_g1_i1	11.9034	11.4111	12.5508	12.5567	P62755	RS6_RAT	8.68e-132
DN17001_c0_g1_i2	5.46572	5.66633	5.69783	5.62698	Q5R9D9	ZN330_PONAB	9.75e-132
DN308281_c0_g1_i1	6.62123	4.78843	4.16106	4.76453	A1B4B8	SYFA_PARDP	9.85e-132
DN65197_c0_g1_i1	4.16106	7.20663	4.16106	4.16106	P49395	RS3A_APLCA	1.13e-131
DN9674_c0_g1_i1	5.72211	5.23156	5.129	4.65498	Q5YJC2	GSK3B_SPECI	1.23e-131
DN1079_c0_g1_i7	7.81176	8.69494	8.67381	7.91227	P27105	STOM_HUMAN	1.24e-131
DN225133_c0_g2_i1	5.12227	4.84725	5.9709	6.40848	Q11010	AMPN_STRLI	1.49e-131
DN77210_c0_g1_i1	5.43304	4.16106	4.95619	6.13761	Q6A780	DNAE2_CUTAK	1.55e-131
DN549_c0_g1_i5	8.5705	10.4196	7.42502	9.13283	Q6P4Z2	CO2A1_XENTR	2.27e-131
DN46570_c0_g1_i4	5.55806	5.57338	5.55755	4.93646	Q32NQ7	DAAF3_XENLA	2.3e-131
DN74735_c0_g1_i1	5.97311	5.44468	5.33615	4.16106	A1R548	RECA_PAEAT	2.33e-131
DN19356_c1_g2_i1	6.16366	5.57338	6.43318	4.16106	P50215	IDH_SPHYA	2.59e-131
DN12419_c0_g1_i4	4.47008	6.13776	4.16106	5.19187	Q9IBG7	KCP_XENLA	3.84e-131
DN5710_c0_g1_i7	5.32811	6.16751	4.95619	5.07429	Q5SZK8	FREM2_HUMAN	3.87e-131
DN204902_c0_g1_i1	5.36433	5.62083	5.20346	6.04126	Q8NRC3	ODO12_CORGL	4.31e-131
DN9879_c0_g1_i3	6.59602	6.97763	7.09315	8.05762	Q9JHU4	DYHC1_MOUSE	4.33e-131
DN2308_c0_g1_i4	4.91098	5.85122	5.65301	5.13512	Q5RDE7	NFS1_PONAB	4.94e-131
DN2308_c0_g1_i3	5.36433	6.22503	5.93551	6.37031	Q5RDE7	NFS1_PONAB	4.94e-131
DN180284_c0_g1_i2	5.07456	5.32869	5.60631	5.43267	P62914	RL11_RAT	5.23e-131
DN72271_c0_g1_i1	5.58714	4.95099	6.0053	5.99014	Q5HZ68	GAMTB_XENLA	5.33e-131
DN2723_c0_g1_i4	8.45979	8.1783	7.97647	7.54315	P08587	TGM2_CAVCU	5.44e-131
DN33363_c0_g1_i1	5.61548	6.95333	4.72681	6.33098	Q62638	GSLG1_RAT	6.04e-131
DN5093_c0_g2_i1	8.3435	8.42111	7.71291	8.37638	P46638	RB11B_MOUSE	6.45e-131
DN1018_c0_g1_i1	7.72392	8.47798	8.75994	8.22072	Q803X0	SERC5_DANRE	9.34e-131
DN253_c0_g1_i5	6.3448	6.63264	6.3322	7.21945	Q80XC3	US6NL_MOUSE	1.1e-130
DN96434_c0_g1_i3	6.96197	6.31988	7.6437	7.27051	Q5ZJN2	RB11A_CHICK	1.26e-130
DN221644_c0_g2_i1	5.07456	5.41692	5.86146	5.55343	C5CCF1	CARB_MICLC	1.31e-130
DN22757_c0_g1_i1	7.44303	7.35519	6.57155	8.11961	Q5NC05	TTF2_MOUSE	1.37e-130
DN176272_c0_g1_i1	6.29786	4.64854	6.07136	4.16106	Q3IZ78	MCH_RHOS4	1.56e-130
DN886_c0_g1_i3	9.55019	9.89326	9.60359	9.22258	Q6NYV9	LEO1_DANRE	1.6e-130
DN5328_c1_g1_i1	7.94872	8.20889	7.74158	7.65438	Q29HY3	CDC42_DROPS	1.76e-130
DN8207_c0_g1_i5	5.29047	5.38837	4.72681	5.55343	Q9PU85	PIM3_COTJA	1.76e-130
DN253_c0_g1_i11	6.5573	6.77936	6.3322	7.2401	Q80XC3	US6NL_MOUSE	1.82e-130
DN23293_c0_g1_i2	7.82237	8.15054	7.23544	8.53754	Q99538	LGMN_HUMAN	1.89e-130
DN10409_c0_g1_i1	5.58714	6.54737	4.16106	4.16106	Q6ZQ08	CNOT1_MOUSE	3.97e-130
DN110035_c0_g1_i2	4.8469	5.96014	4.16106	4.16106	Q07130	UGPA_BOVIN	4.65e-130
DN65294_c0_g1_i1	4.47008	6.10728	4.16106	4.16106	Q7SXN4	CPEB4_DANRE	5.63e-130
DN20017_c0_g1_i4	7.08308	7.04808	6.91777	5.82251	Q9DBG7	SRPRA_MOUSE	6.28e-130
DN972_c3_g1_i1	9.69496	9.42253	10.2606	10.0167	Q5ZIN1	NUDC_CHICK	6.31e-130
DN4327_c0_g1_i3	8.79623	8.74904	8.8887	9.46029	B5RI54	EIF3H_SALSA	8.33e-130
DN608_c1_g1_i3	5.81964	5.92492	4.16106	5.5147	Q90744	NAGAB_CHICK	8.39e-130
DN16258_c0_g1_i1	5.39927	5.41692	5.50647	4.16106	Q25531	VA0D_MANSE	8.75e-130
DN3712_c0_g1_i2	6.41948	6.5692	4.16106	6.22716	Q6DCX2	AGO2_XENLA	1.16e-129
DN233774_c0_g1_i2	5.43304	5.47171	5.20346	5.07429	C5CC70	RPOC_MICLC	1.18e-129
DN4167_c0_g1_i4	8.15968	8.23225	8.27899	7.89946	Q5REY6	RHOA_PONAB	1.22e-129
DN449348_c0_g1_i1	6.28182	4.16106	4.16106	4.16106	Q9I742	CLPV1_PSEAE	1.39e-129
DN210760_c1_g1_i1	5.97311	5.19676	6.19389	4.16106	C5C8I6	HUTI_MICLC	1.52e-129
DN21202_c0_g1_i5	6.24916	6.88635	6.527	6.38953	P04939	MUP3_MOUSE	1.63e-129
DN4831_c0_g1_i2	8.44619	8.0676	9.11607	8.80721	Q4R5L5	ANXA7_MACFA	1.65e-129
DN282406_c1_g1_i2	5.21031	4.84725	6.83006	6.40848	A0QVT2	RNJ_MYCS2	1.91e-129
DN11868_c0_g1_i4	5.90972	6.29348	4.56238	5.9368	C7EXK4	AT8A2_BOVIN	2e-129
DN65678_c0_g1_i5	7.35029	7.2601	7.04748	6.86633	O60704	TPST2_HUMAN	2e-129
DN15828_c0_g2_i1	5.29047	5.88864	7.1228	6.26969	Q6NZ22	MET14_DANRE	2.16e-129
DN100921_c0_g1_i1	7.22708	6.57998	7.60258	7.2805	Q9H7Z6	KAT8_HUMAN	2.97e-129
DN114221_c0_g1_i1	4.47008	5.57338	4.95619	6.20535	P06695	TNP5_PSEAI	3.3e-129
DN406905_c0_g1_i1	5.69638	5.62083	5.60631	5.13512	P35679	RL4A_SCHPO	3.67e-129
DN202954_c0_g1_i3	6.14586	4.78843	4.95619	4.16106	A1B8E8	EFTS_PARDP	3.75e-129
DN5338_c0_g1_i2	5.79601	5.38837	5.4528	6.18317	Q05688	IGF1R_BOVIN	4.72e-129
DN5035_c0_g1_i1	7.17793	6.8339	6.79334	6.87967	A0A1S6M251	B4GT5_PIG	6.84e-129
DN20970_c1_g1_i3	4.59726	5.38837	5.20346	5.90923	P06694	TNP2_ECOLX	7.21e-129
DN248605_c0_g2_i2	6.23251	5.04157	4.56238	5.0085	Q42523	MCCA_ARATH	1.17e-128
DN96517_c0_g1_i1	4.77563	4.95099	5.55755	5.82251	Q6A5X8	SYR_CUTAK	1.21e-128
DN4655_c0_g1_i4	7.29003	7.15811	8.46163	7.93754	Q02040	AK17A_HUMAN	1.34e-128
DN4655_c0_g1_i5	7.37948	7.72519	8.5011	7.16647	Q02040	AK17A_HUMAN	1.56e-128
DN2595_c0_g1_i1	6.97167	5.59736	6.91777	6.93178	Q9P2T1	GMPR2_HUMAN	1.57e-128
DN8799_c0_g1_i1	7.06512	7.15103	7.07809	6.46376	Q4TVV3	DDX46_DANRE	1.71e-128
DN196292_c0_g2_i1	5.72211	4.16106	7.12279	5.13512	Q6A9Z4	GLNE_CUTAK	1.91e-128
DN4091_c0_g1_i1	7.88947	7.62245	8.5503	8.6485	Q9Z1Z2	STRAP_MOUSE	2e-128
DN118247_c0_g2_i2	5.32811	5.99439	6.38366	6.04126	P65173	Y1874_MYCBO	2.04e-128
DN2853_c0_g1_i16	6.1278	6.43252	6.19389	6.60084	Q6GLR7	CAPS1_XENLA	2.05e-128
DN361571_c0_g2_i1	5.99354	4.84725	6.0053	5.62698	P9WH43	RS1_MYCTU	2.09e-128
DN21427_c0_g1_i2	6.01363	4.64854	5.20346	5.47449	P18183	SIGA_STRCO	2.24e-128
DN353233_c0_g2_i1	5.07456	5.32869	5.50647	5.34345	P62325	BTG1_MOUSE	2.47e-128
DN1821_c0_g1_i3	6.9522	6.51394	6.22276	7.07729	O14972	VP26C_HUMAN	2.47e-128
DN112278_c0_g1_i1	5.07456	4.44339	6.527	6.33099	E3PY95	OAME_ACESD	2.75e-128
DN7588_c0_g1_i1	5.21031	6.28008	4.16106	5.19187	Q6JHU9	CBP_RAT	3.09e-128
DN15753_c0_g1_i1	6.65818	6.22503	7.38909	6.06605	Q7ZYJ9	AASDB_XENLA	3.25e-128
DN26453_c0_g1_i2	5.49741	5.16055	4.16106	5.76095	Q3UHH1	ZSWM8_MOUSE	3.51e-128
DN41495_c0_g2_i11	6.31369	7.04042	6.251	7.07729	Q26619	KAPR_STRPU	3.6e-128
DN100031_c0_g1_i1	6.29786	4.55971	5.12901	4.16106	Q165J6	RF2_ROSDO	4.25e-128
DN255842_c0_g1_i2	5.61547	4.78843	6.10312	6.22716	P37419	KBL_SALTY	4.46e-128
DN13013_c0_g2_i2	5.69638	5.29741	4.72681	6.11421	P06695	TNP5_PSEAI	4.62e-128
DN1000_c0_g1_i8	6.60868	7.54422	7.37691	7.12259	Q9NV70	EXOC1_HUMAN	4.88e-128
DN162018_c0_g1_i2	4.16106	4.72307	6.45727	5.0085	C5CAM5	ASSY_MICLC	5.2e-128
DN16552_c0_g2_i1	5.39927	6.0277	5.50647	5.85212	C5C9Q4	RS2_MICLC	5.36e-128
DN116309_c0_g1_i2	5.02386	5.54886	5.9709	6.90597	A0JYN1	DCUP_ARTS2	5.37e-128
DN32637_c0_g1_i1	6.16366	7.13678	7.15182	6.83925	Q2KJG3	SYNC_BOVIN	5.9e-128
DN396127_c0_g1_i1	6.18122	5.04157	4.95619	4.16106	Q16AV0	SYK_ROSDO	9.1e-128
DN14398_c0_g1_i5	5.58714	5.23156	5.33615	5.43267	Q9UHD8	SEPT9_HUMAN	9.55e-128
DN1450_c0_g1_i3	8.07811	9.84122	10.6727	9.70146	Q26636	CATL_SARPE	1.2e-127
DN347786_c0_g1_i8	5.32811	5.38837	4.16106	5.62698	P70398	USP9X_MOUSE	1.23e-127
DN136913_c0_g2_i2	5.07456	5.19676	6.95136	6.01596	Q06734	ASSY_STRLA	1.25e-127
DN196922_c0_g1_i2	5.4974	5.04157	6.22276	5.07429	Q9XAD5	CSD_STRCO	1.28e-127
DN27944_c0_g1_i4	4.91098	6.18214	5.27216	5.79214	Q5ZKI4	CCD93_CHICK	1.49e-127
DN76851_c0_g2_i1	5.52816	6.40831	4.16106	5.43267	O55012	PICAL_RAT	1.7e-127
DN37314_c0_g1_i2	6.21564	5.29741	4.16106	4.51116	Q88RB9	DAVT_PSEPK	1.75e-127
DN1685_c0_g1_i3	11.7112	11.4973	11.6544	12.6578	Q5R931	RL10_PONAB	1.8e-127
DN9371_c0_g1_i8	4.69429	5.83207	5.27216	4.16106	P17948	VGFR1_HUMAN	1.93e-127
DN177381_c0_g1_i1	4.77563	5.41692	5.04733	6.89288	A1R8V4	RPOB_PAEAT	1.98e-127
DN23619_c0_g1_i1	5.99354	6.46803	7.03191	7.35797	Q9UKZ1	CNO11_HUMAN	2.3e-127
DN40728_c0_g1_i3	5.90972	6.42047	6.22276	5.90923	Q7Z4L5	TT21B_HUMAN	2.89e-127
DN14802_c0_g1_i2	5.67005	6.33289	4.16106	5.07429	Q15262	PTPRK_HUMAN	2.98e-127
DN10618_c0_g2_i1	6.58323	7.15811	7.20812	7.45799	Q68EK7	RAB4B_DANRE	3.17e-127
DN6924_c0_g1_i4	5.74727	4.44339	5.93551	5.9368	A1B002	EFTU_PARDP	3.21e-127
DN62478_c0_g1_i3	5.97312	6.13776	4.16106	5.19187	P28347	TEAD1_HUMAN	3.72e-127
DN7634_c0_g1_i2	6.3448	5.62083	5.27216	5.34345	Q2KIA6	PRPF3_BOVIN	3.88e-127
DN20054_c0_g1_i4	6.58323	6.91185	7.06287	6.61703	B2RU80	PTPRB_MOUSE	4.34e-127
DN502793_c0_g1_i1	4.59726	5.32869	5.93551	5.85212	P78581	TAN_ASPOR	4.45e-127
DN53064_c0_g1_i1	6.26559	4.16106	4.72681	4.65498	Q8UEM4	NRDJ_AGRFC	4.68e-127
DN214613_c0_g1_i2	7.10959	4.55971	4.56238	4.16106	D5AV16	COBD_RHOCB	4.71e-127
DN10662_c0_g1_i2	6.46234	4.72307	4.16106	5.43267	A0R574	CLPC1_MYCS2	5.23e-127
DN327829_c0_g1_i1	5.12227	5.29741	6.54946	5.82251	Q7CCJ4	PTG3C_STAES	5.72e-127
DN36982_c0_g1_i1	5.72211	5.83207	6.40866	6.33098	P71012	PTF3A_BACSU	6.42e-127
DN75929_c0_g1_i1	6.8818	5.08318	4.16106	4.65498	O30807	MAO1_RHIME	6.68e-127
DN6199_c0_g1_i1	6.23251	6.60129	5.86146	5.66199	Q61093	CY24B_MOUSE	1e-126
DN116480_c0_g1_i2	5.52816	6.33289	4.56238	5.9368	Q9I0K4	ACEA_PSEAE	1.04e-126
DN246712_c0_g1_i1	6.07201	4.16106	4.56238	5.19187	Q5YQ94	ISPH_NOCFA	1.11e-126
DN40800_c0_g2_i1	5.7719	6.31988	4.16106	4.51116	Q8IZQ1	WDFY3_HUMAN	1.14e-126
DN5328_c1_g1_i3	7.84855	8.2682	7.74158	7.5097	Q8CFN2	CDC42_RAT	1.22e-126
DN8515_c0_g1_i17	7.24308	6.94513	5.33615	5.43267	Q3UHC7	DAB2P_MOUSE	1.26e-126
DN48756_c1_g1_i1	6.83991	4.64854	4.95619	4.51116	A8LKJ1	LEUC_DINSH	1.31e-126
DN2853_c0_g1_i18	6.36008	6.18214	5.89906	6.46376	Q62717	CAPS1_RAT	1.41e-126
DN2853_c0_g1_i12	6.05285	5.96014	6.0053	5.90923	Q62717	CAPS1_RAT	1.41e-126
DN134196_c0_g4_i1	6.16366	4.16106	6.3322	4.16106	Q05755	GLTB_AZOBR	1.57e-126
DN254489_c0_g1_i5	6.67028	6.86909	7.01617	7.08875	Q5R7X2	SR140_PONAB	1.68e-126
DN48810_c1_g2_i1	5.49741	4.95099	6.0053	6.78344	Q6A6P1	RL6_CUTAK	1.93e-126
DN6566_c0_g1_i3	8.14711	7.51168	8.34249	8.11408	P09527	RAB7A_RAT	2.05e-126
DN208092_c0_g1_i1	5.12227	5.71006	6.67687	5.69594	P63029	TCTP_RAT	2.22e-126
DN10873_c0_g1_i5	6.69415	6.19659	6.63573	6.55106	Q5R5F5	IF4A1_PONAB	2.75e-126
DN20054_c0_g1_i3	6.65818	6.9034	6.75561	6.85286	B2RU80	PTPRB_MOUSE	3.12e-126
DN131995_c0_g1_i1	6.8505	5.47171	4.72681	4.16106	P00335	RIDH_KLEAE	3.56e-126
DN19857_c0_g1_i1	6.3448	5.38837	4.16106	4.16106	P56517	HDAC1_CHICK	3.91e-126
DN14783_c0_g1_i1	5.12227	5.66633	5.20346	5.2452	Q3SYT8	NCPR_BOVIN	4.01e-126
DN4615_c0_g1_i4	7.15269	7.02499	7.85078	7.00644	Q4FS54	ILVD_PSYA2	4.02e-126
DN9566_c0_g1_i3	6.5573	5.97738	5.69783	7.34852	Q15428	SF3A2_HUMAN	5.16e-126
DN190651_c0_g1_i3	7.05605	6.42047	7.01617	7.13369	O73817	PSB3_ONCMY	5.36e-126
DN237677_c0_g1_i1	6.49017	4.44339	4.16106	5.0085	Q6A8P5	GATA_CUTAK	5.54e-126
DN448102_c0_g1_i1	4.16106	4.44339	5.69783	6.56786	P78617	TREA_EMENI	6.07e-126
DN27724_c0_g1_i1	6.23251	6.44446	4.56238	5.34345	Q92503	S14L1_HUMAN	6.42e-126
DN27450_c0_g1_i4	6.5573	6.77936	4.16106	4.76453	O93574	RELN_CHICK	7.29e-126
DN68218_c0_g1_i2	4.8469	6.09177	4.16106	4.85623	Q9JIS8	S12A4_MOUSE	7.59e-126
DN91389_c0_g1_i2	5.6431	6.15272	5.39618	5.66199	Q15139	KPCD1_HUMAN	9.92e-126
DN5169_c0_g1_i1	7.3429	7.1998	8.50665	7.98679	A6QQ21	CSN6_BOVIN	1.15e-125
DN505655_c0_g1_i1	5.61547	5.23156	5.4528	5.13512	P19783	COX41_MOUSE	1.23e-125
DN12428_c0_g2_i1	5.49741	5.52376	5.55755	5.2452	P41116	RL8_XENLA	1.23e-125
DN20054_c0_g1_i5	5.55806	5.94266	4.85179	5.13512	B2RU80	PTPRB_MOUSE	1.51e-125
DN94457_c0_g2_i1	4.8469	4.95099	6.1341	6.63303	Q89KR6	SYQ_BRADU	1.99e-125
DN192763_c0_g1_i3	6.19855	5.83207	4.16106	5.55343	E3WDQ9	PUM2_XENLA	2.33e-125
DN5753_c0_g1_i1	6.78567	6.01115	6.61467	6.89288	Q921G8	GCP2_MOUSE	2.37e-125
DN26204_c0_g1_i1	6.03339	6.7886	5.82265	6.40848	O15440	MRP5_HUMAN	2.37e-125
DN163179_c0_g1_i1	6.26559	6.37114	6.3322	6.22716	P53992	SC24C_HUMAN	2.55e-125
DN163179_c0_g1_i2	6.05285	5.99439	5.74095	6.09036	P53992	SC24C_HUMAN	2.55e-125
DN152_c0_g1_i6	7.64832	7.59685	7.87682	7.5097	Q6NV83	SR140_MOUSE	3.79e-125
DN21665_c0_g1_i1	6.94236	6.16751	6.40866	6.33098	Q9JJK2	LANC2_MOUSE	3.84e-125
DN260467_c0_g1_i1	5.39928	5.85123	4.56238	4.16106	C5CA38	RSMH_MICLC	5.24e-125
DN2134_c0_g1_i1	7.3429	7.4093	7.36462	7.45799	Q9DBG7	SRPRA_MOUSE	5.31e-125
DN64731_c0_g3_i2	5.29047	6.10728	5.04733	5.55343	O75962	TRIO_HUMAN	7.07e-125
DN11853_c0_g1_i1	8.13017	7.1998	7.22185	8.05185	Q5E956	TPIS_BOVIN	8.97e-125
DN19704_c0_g1_i2	5.84281	5.35898	4.16106	5.19187	P42345	MTOR_HUMAN	1.01e-124
DN15895_c0_g1_i4	5.7719	7.10784	4.56238	5.66199	Q5RBG1	RAB5B_PONAB	1.07e-124
DN395429_c0_g1_i2	6.72919	4.16106	5.04733	4.16106	A1B8C2	CTAA_PARDP	1.16e-124
DN72_c0_g1_i2	9.5486	10.5484	6.19389	8.80379	Q8CIZ8	VWF_MOUSE	1.61e-124
DN851_c0_g1_i6	6.01363	6.51394	7.10805	6.71031	O46560	PDXK_PIG	1.77e-124
DN326854_c0_g1_i1	5.32811	4.9011	5.69783	6.71031	Q6A9C3	LDH_CUTAK	1.91e-124
DN34418_c0_g2_i1	5.07456	5.7313	6.03877	6.46376	A0LSK4	RF1_ACIC1	1.95e-124
DN39884_c0_g1_i2	5.46572	6.38365	4.16106	4.51116	P56941	NPC1_PIG	2.04e-124
DN87615_c0_g2_i3	7.14418	8.3649	6.77461	6.6952	Q60841	RELN_MOUSE	2.36e-124
DN13735_c0_g1_i7	6.63366	7.1998	5.20346	6.42716	Q7PMT1	EXD_ANOGA	2.48e-124
DN125111_c0_g1_i1	4.8469	4.44339	4.56238	6.35079	Q4WKH9	RUVB2_ASPFU	2.68e-124
DN2440_c0_g1_i8	5.12227	5.54886	5.33615	5.69594	Q8BU30	SYIC_MOUSE	2.78e-124
DN26185_c0_g2_i2	4.8469	6.35851	4.16106	5.47449	Q8QZR1	ATTY_MOUSE	2.85e-124
DN8871_c0_g1_i5	4.91098	5.90691	4.56238	5.2452	Q921L8	GLT11_MOUSE	3.29e-124
DN72_c0_g1_i13	10.1595	11.0943	9.92854	9.84461	Q8CIZ8	VWF_MOUSE	3.63e-124
DN312256_c0_g1_i1	4.91098	4.16106	6.251	5.88102	Q6A9M5	COAE_CUTAK	5.97e-124
DN24852_c0_g1_i1	5.52816	5.52376	4.56238	5.13512	P53668	LIMK1_MOUSE	6.35e-124
DN104694_c0_g1_i1	6.50387	5.19676	5.55755	4.16106	A1B9D2	ENO_PARDP	6.7e-124
DN8406_c0_g1_i5	5.99354	6.63264	5.39618	5.85212	Q8NF91	SYNE1_HUMAN	6.88e-124
DN788_c0_g1_i5	7.39385	7.66247	7.57094	7.15563	Q8VEH3	ARL8A_MOUSE	1.02e-123
DN6360_c0_g1_i1	7.29003	7.95566	8.74594	8.52512	Q8VDM4	PSMD2_MOUSE	1.14e-123
DN13084_c0_g2_i1	8.05135	8.54072	8.28547	9.11088	Q58DU5	PSA3_BOVIN	1.35e-123
DN12211_c0_g1_i6	5.97312	6.73219	4.16106	6.20535	O43184	ADA12_HUMAN	1.37e-123
DN7446_c0_g1_i1	7.85889	7.93136	7.71291	8.43066	P51593	HUWE1_RAT	1.4e-123
DN8137_c0_g1_i1	5.88783	6.65314	6.90067	5.90923	Q7ZVX6	UBA3_DANRE	1.58e-123
DN266185_c0_g1_i1	6.19855	5.16055	5.78252	4.93646	P33108	SECY_MICLU	1.59e-123
DN57184_c0_g1_i1	7.03774	6.69324	6.22276	7.36736	P18514	RARA_NOTVI	1.65e-123
DN30652_c0_g1_i3	6.01363	5.44468	4.95619	4.16106	O00141	SGK1_HUMAN	1.69e-123
DN105764_c0_g1_i1	5.36433	5.77266	4.85179	4.16106	Q8VDM4	PSMD2_MOUSE	1.71e-123
DN3634_c0_g1_i6	4.77563	7.27316	5.04733	4.16106	Q9W6Y1	HSP7C_ORYLA	1.88e-123
DN65176_c0_g2_i1	4.77563	5.08318	5.86146	5.96376	P9WMQ5	MFD_MYCTU	1.96e-123
DN322126_c0_g1_i1	4.77563	6.10728	4.16106	4.16106	Q6GNY1	MIB1_XENLA	2.35e-123
DN25054_c0_g2_i1	5.55806	5.38837	5.86146	5.34345	Q8GAI8	SSDH_PAENI	2.56e-123
DN328622_c0_g1_i1	4.16106	5.04157	5.93551	5.79214	Q6AA78	ARCA_CUTAK	2.74e-123
DN13143_c0_g1_i2	6.82923	6.64293	7.26225	7.05407	Q2KIA4	SCD5_BOVIN	3.09e-123
DN238514_c0_g3_i1	6.39011	4.55971	4.16106	4.16106	Q3IZ91	CCCR_RHOS4	3.31e-123
DN15294_c0_g1_i2	6.87145	6.87775	7.49424	7.00644	Q6GMH0	PRP18_DANRE	3.37e-123
DN14060_c0_g3_i1	5.02386	5.52376	5.20346	6.06605	A9WP08	ILVC_RENSM	3.5e-123
DN133525_c0_g1_i1	7.38668	7.38551	7.87682	7.76462	Q0MQI9	NDUV2_PANTR	4.01e-123
DN155731_c0_g1_i2	5.12227	5.83207	6.1341	5.76095	P53382	APBC_MYCLE	4.07e-123
DN11467_c0_g2_i4	6.83991	5.41692	6.1341	4.93646	A1B002	EFTU_PARDP	4.41e-123
DN30514_c0_g1_i1	4.59726	6.59068	4.16106	5.13512	Q3UR85	MYRF_MOUSE	6.86e-123
DN55271_c0_g1_i1	5.90972	6.22503	7.19426	5.82251	Q8K1J6	TRNT1_MOUSE	8.49e-123
DN15681_c0_g1_i1	5.39927	6.53632	5.129	6.49937	Q9H172	ABCG4_HUMAN	9.3e-123
DN13439_c0_g2_i1	5.29047	5.47171	6.61467	6.33098	Q8NNN0	MURE_CORGL	9.72e-123
DN3152_c0_g1_i3	5.55806	5.57338	4.16106	5.43267	Q7TQK0	CCNT2_MOUSE	1.02e-122
DN15899_c1_g1_i1	8.51946	5.35898	4.85179	4.76453	P16942	T629_SHISO	1.05e-122
DN7379_c0_g1_i1	7.56847	7.3242	7.50545	8.48295	Q28F55	KAD2_XENTR	1.33e-122
DN7379_c0_g1_i3	7.41514	7.57603	7.92752	8.42175	Q28F55	KAD2_XENTR	1.33e-122
DN3614_c0_g1_i13	6.97167	7.64759	7.86819	7.25031	Q9DBT5	AMPD2_MOUSE	1.49e-122
DN8181_c0_g1_i3	7.01918	8.14703	8.75994	7.79262	Q8HXW6	PPT1_MACFA	1.55e-122
DN1579_c0_g1_i1	6.46234	6.79778	6.84805	6.66447	Q6AYU1	MO4L1_RAT	1.69e-122
DN236684_c0_g2_i1	6.58323	4.16106	5.65301	4.51116	Q8J0I4	MET3_MUCCL	1.8e-122
DN428449_c0_g1_i1	4.59726	4.95099	7.04748	4.85623	Q6A8C4	ATPD_CUTAK	1.95e-122
DN7964_c0_g1_i1	9.54701	9.16687	10.0774	10.0646	Q7T2A5	EIF3L_DANRE	2.06e-122
DN1624_c0_g1_i3	6.74068	7.52804	8.34869	6.66447	Q5RDQ2	MPP5_PONAB	2.44e-122
DN4046_c0_g1_i8	6.65818	6.9936	6.73635	6.38953	Q6PH08	ERC2_MOUSE	2.63e-122
DN401743_c0_g1_i1	7.30534	4.72307	5.50647	4.16106	P37744	RMLA1_ECOLI	2.79e-122
DN68257_c0_g2_i1	4.91098	5.04158	6.22276	4.76453	P07747	CYB_WHEAT	3e-122
DN256_c0_g1_i2	6.94236	6.07605	7.31436	7.45799	Q6VEU3	PNO1_DANRE	3.07e-122
DN297790_c0_g1_i4	6.9522	7.1581	7.63353	7.03046	O46427	CATH_PIG	3.8e-122
DN5156_c0_g1_i3	5.84281	5.87008	6.38366	6.71031	Q8BZQ7	ANC2_MOUSE	4.53e-122
DN6243_c0_g1_i1	7.51044	7.29891	6.27864	7.89301	P33198	IDHP_PIG	5.55e-122
DN1880_c0_g1_i8	7.20272	7.71096	7.73209	7.78567	Q86UA1	PRP39_HUMAN	5.65e-122
DN5660_c0_g1_i1	7.75196	6.9936	7.43679	8.26624	P00125	CY1_BOVIN	5.72e-122
DN19631_c0_g1_i2	4.8469	5.7313	4.16106	5.79214	Q80Z96	VANG1_MOUSE	7.63e-122
DN2568_c0_g1_i2	9.39983	9.33765	9.93472	9.29006	Q9Y2X3	NOP58_HUMAN	8.72e-122
DN1484_c1_g1_i2	8.49325	8.77875	8.75994	7.87349	Q28034	GLU2B_BOVIN	1.02e-121
DN38155_c0_g2_i1	6.50387	6.18214	4.95619	6.04126	A0A0R4IBK5	R213A_DANRE	1.72e-121
DN6055_c0_g1_i1	5.25126	6.29348	4.16106	5.62698	P23468	PTPRD_HUMAN	2.09e-121
DN13470_c0_g1_i5	7.16116	6.8339	6.63573	6.53405	P15259	PGAM2_HUMAN	2.22e-121
DN6304_c0_g1_i2	7.39385	7.35519	7.97647	7.91227	P70076	SYHC_TAKRU	2.33e-121
DN22378_c1_g1_i1	5.61548	5.44468	5.89906	6.66447	B2GIL2	EFTU_KOCRD	2.41e-121
DN204115_c0_g1_i1	5.21031	4.16106	5.65301	5.82251	P30333	RP55_BRADU	2.63e-121
DN1653_c0_g1_i3	7.72957	8.05642	7.47154	7.73605	Q6GLT8	FAHD2_XENLA	2.66e-121
DN896_c0_g1_i3	5.21031	6.0277	4.56238	5.96376	D3ZHA0	FLNC_RAT	2.72e-121
DN31591_c0_g2_i1	4.59726	5.88864	5.129	5.79214	P76077	PAAA_ECOLI	2.77e-121
DN154430_c0_g1_i2	6.90229	4.78843	4.72681	4.16106	Q6AAP6	COBQ_CUTAK	2.82e-121
DN1831_c0_g1_i1	6.69415	6.54737	6.63573	6.58445	A7S7F2	BYST_NEMVE	3.06e-121
DN436156_c0_g1_i1	5.93122	4.99765	4.16106	5.5147	B2GH80	UVRC_KOCRD	3.11e-121
DN151095_c0_g2_i1	6.31369	4.55971	5.78252	4.16106	Q5ZWR1	COPA_LEGPH	4.14e-121
DN16531_c0_g1_i1	5.86553	5.7928	4.56238	5.55343	P23098	DYHC_TRIGR	4.3e-121
DN17226_c0_g1_i2	5.55806	5.64381	6.84805	5.13512	C5CBZ4	GUAA_MICLC	4.61e-121
DN95094_c0_g1_i1	5.52816	5.97738	5.82265	5.79214	P67126	Y1496_MYCBO	4.65e-121
DN238429_c0_g1_i1	5.6431	4.64854	5.65301	5.72891	Q6A9Q2	MURG_CUTAK	5.96e-121
DN77878_c0_g1_i2	7.517	7.38551	7.48294	6.75466	Q810A7	DDX42_MOUSE	6.25e-121
DN229527_c0_g1_i1	5.67005	5.19676	5.12901	5.76095	Q6A6T7	COAA_CUTAK	6.4e-121
DN895_c0_g1_i6	7.50384	8.15753	7.57094	7.30027	P63155	CRNL1_RAT	6.81e-121
DN294526_c0_g1_i1	5.25126	5.04157	6.43318	6.18317	Q6A8Y9	NRDR_CUTAK	7.25e-121
DN470935_c0_g1_i1	4.16106	5.23156	5.55755	6.44559	A0A0A2JW91	CNSI_PENEN	8.14e-121
DN21389_c0_g1_i2	6.67027	7.24692	7.63353	7.00644	Q9NZN8	CNOT2_HUMAN	8.23e-121
DN426432_c0_g1_i1	6.01363	5.19676	5.55755	4.76453	P63090	PTN_RAT	8.76e-121
DN5939_c0_g1_i1	8.35082	9.25723	7.38909	6.44559	Q58A42	DD3_DICDI	9.27e-121
DN20970_c1_g1_i6	5.12227	5.49806	5.04733	5.82251	P06694	TNP2_ECOLX	9.97e-121
DN8406_c0_g1_i3	5.88783	6.10728	5.33615	5.85212	Q8NF91	SYNE1_HUMAN	1e-120
DN3152_c0_g1_i4	7.22707	7.96766	7.26225	7.91863	Q7TQK0	CCNT2_MOUSE	1.3e-120
DN3152_c0_g1_i7	7.41514	7.86875	7.54945	8.18429	Q7TQK0	CCNT2_MOUSE	1.3e-120
DN210479_c0_g1_i1	4.9696	5.08318	5.86146	5.38905	P9WQM7	ANSP2_MYCTU	1.36e-120
DN201980_c0_g1_i1	4.16106	5.97738	5.20346	5.2452	Q5U2V4	PLBL1_RAT	1.47e-120
DN303946_c0_g1_i2	5.55806	6.53632	6.07136	6.49937	O43306	ADCY6_HUMAN	1.56e-120
DN244206_c0_g2_i1	4.9696	5.29741	5.27216	5.69594	Q57180	Y1051_HAEIN	1.58e-120
DN15378_c0_g2_i2	4.16106	5.97738	4.16106	6.29045	P00535	ERBB_AVIER	1.91e-120
DN10782_c0_g2_i1	5.21031	5.7313	5.27216	4.85623	Q2KNA0	CYTSA_CANLF	1.95e-120
DN353162_c0_g1_i1	6.01363	5.96014	5.89906	6.48168	P94360	MSMX_BACSU	1.96e-120
DN10302_c0_g1_i1	9.96858	9.63085	10.1482	9.32146	Q6PCR7	EIF3A_DANRE	2.24e-120
DN9860_c0_g1_i3	5.32811	6.42047	4.95619	6.75466	P98157	LRP1_CHICK	2.52e-120
DN14640_c0_g1_i2	6.36008	5.47171	6.90067	5.69594	Q14376	GALE_HUMAN	3.12e-120
DN4046_c0_g1_i10	6.77456	7.12238	6.83006	6.42716	Q6PH08	ERC2_MOUSE	3.56e-120
DN38411_c1_g1_i2	5.25126	5.75217	6.0053	5.38906	P17742	PPIA_MOUSE	3.7e-120
DN54038_c0_g1_i3	5.55806	5.92492	4.95619	5.55343	Q9JI33	NET4_MOUSE	4.62e-120
DN31018_c2_g1_i1	5.39927	5.08318	5.86146	5.5147	Q6A9J3	PGK_CUTAK	6.71e-120
DN165509_c0_g1_i3	9.22399	4.78843	5.39618	4.85623	P55630	Y4QI_SINFN	8.02e-120
DN15938_c0_g1_i2	4.91098	6.84278	4.16106	5.38906	Q8R2E9	ERO1B_MOUSE	8.6e-120
DN2615_c0_g1_i14	5.88783	5.97738	5.60631	5.59082	Q8IWZ3	ANKH1_HUMAN	1e-119
DN1327_c0_g1_i3	7.98218	7.96766	7.91919	7.46674	Q7Z7H5	TMED4_HUMAN	1.07e-119
DN2017_c0_g1_i1	6.94236	7.5549	7.73209	7.56773	P41976	SODM_BOVIN	1.1e-119
DN11024_c0_g1_i1	5.88783	5.59736	4.16106	4.16106	Q3MHH4	SYQ_BOVIN	1.21e-119
DN5045_c0_g2_i2	6.89208	5.54886	5.60631	6.06605	Q3SZZ0	BRX1_BOVIN	1.29e-119
DN5045_c0_g2_i1	7.58105	7.27316	8.67381	8.35782	Q3SZZ0	BRX1_BOVIN	1.33e-119
DN448933_c0_g1_i1	5.02386	5.41692	6.50416	4.85623	Q6A9P7	SEPF_CUTAK	1.67e-119
DN291398_c0_g1_i2	5.39928	5.64381	4.85179	4.51116	P61265	STX1B_RAT	1.8e-119
DN9844_c0_g1_i11	6.57033	6.53632	4.72681	6.18317	Q6YHK3	CD109_HUMAN	1.84e-119
DN46082_c0_g1_i2	6.09088	7.05569	4.16106	6.1606	A0A0R4IBK5	R213A_DANRE	1.95e-119
DN50267_c0_g2_i5	5.7719	5.99439	4.56238	4.93646	Q07960	RHG01_HUMAN	1.97e-119
DN5202_c0_g2_i2	7.70683	10.3423	9.91403	8.47006	Q6YHK3	CD109_HUMAN	2.55e-119
DN22009_c0_g1_i1	5.07456	6.01115	4.85179	5.5147	Q9BQ87	TBL1Y_HUMAN	2.6e-119
DN549_c0_g1_i4	10.0605	11.564	10.9179	10.7473	Q6P4Z2	CO2A1_XENTR	2.85e-119
DN49068_c0_g1_i6	7.61203	7.21343	6.527	7.4134	P31647	S6A11_RAT	2.95e-119
DN10444_c0_g1_i2	5.52816	5.71006	5.33615	6.06605	P52154	RHO_MICLU	3.32e-119
DN16624_c0_g1_i1	5.58714	5.94266	6.19389	6.35079	Q8WVT3	TPC12_HUMAN	3.37e-119
DN180943_c0_g1_i2	5.81964	5.23156	5.78252	5.59082	C5C916	SUCC_MICLC	3.43e-119
DN434963_c0_g1_i1	4.16106	4.16106	4.72681	6.38953	Q5BGR2	MESA_EMENI	3.85e-119
DN21099_c0_g1_i1	5.12227	4.16106	4.56238	6.53405	C5C7X9	GYRA_MICLC	3.91e-119
DN1434_c0_g1_i2	7.67788	8.40066	8.31109	8.59012	A1A4K8	U2AF1_BOVIN	4.58e-119
DN335486_c0_g1_i1	5.36433	5.49806	6.10312	5.13512	P18760	COF1_MOUSE	5.56e-119
DN27543_c0_g1_i2	5.12227	6.01115	5.20346	5.47449	Q09328	MGT5A_HUMAN	7.04e-119
DN18099_c0_g1_i1	6.91241	5.87008	4.16106	4.16106	Q5PPV2	TEKT4_XENLA	7.1e-119
DN4940_c0_g1_i2	6.18122	6.39604	6.43318	5.90923	Q5RDM6	RAP1B_PONAB	7.21e-119
DN253555_c0_g1_i3	6.32934	4.9011	6.3322	5.2956	Q99LD4	CSN1_MOUSE	7.99e-119
DN47369_c0_g1_i1	6.65818	4.16106	4.85179	4.16106	A0R574	CLPC1_MYCS2	8.39e-119
DN128437_c0_g2_i1	5.16741	4.44339	6.07136	6.42716	P77536	YKGF_ECOLI	8.58e-119
DN6997_c0_g1_i1	5.29047	5.94266	4.85179	5.43267	Q9QZR5	HIPK2_MOUSE	9.86e-119
DN8599_c0_g1_i1	6.1278	6.26653	6.27864	6.55106	P51570	GALK1_HUMAN	1.05e-118
DN12211_c0_g1_i4	6.37518	6.67334	4.72681	5.72891	O43184	ADA12_HUMAN	1.29e-118
DN180217_c0_g1_i1	6.75206	6.54737	7.33971	6.40848	Q7Z2Z2	EFL1_HUMAN	1.31e-118
DN437932_c0_g1_i1	8.37616	7.80325	5.78252	7.0185	Q9H1X1	RSPH9_HUMAN	1.38e-118
DN7688_c0_g1_i2	5.99354	6.46803	5.50647	6.56786	Q6P829	NOSIP_XENTR	1.92e-118
DN49638_c0_g1_i1	5.72211	5.66633	4.56238	4.65498	Q6GNL7	AL1L1_XENLA	2.32e-118
DN2647_c0_g1_i4	6.50387	6.39604	6.83006	7.89946	Q9W676	LDB2_CHICK	2.41e-118
DN54913_c1_g1_i2	6.59602	4.55971	5.74095	4.16106	P13499	GLN1B_RHOCA	2.42e-118
DN2573_c0_g2_i9	6.40488	6.92859	6.19389	6.78344	Q3U0J8	TBD2B_MOUSE	3.12e-118
DN72_c0_g1_i7	10.2492	11.0566	9.94496	9.79903	Q8CIZ8	VWF_MOUSE	3.15e-118
DN82970_c0_g1_i1	6.46235	6.8949	4.16106	6.22716	Q9H4A3	WNK1_HUMAN	3.49e-118
DN15091_c0_g1_i2	5.46572	6.63264	4.16106	6.35079	P02730	B3AT_HUMAN	3.8e-118
DN387586_c0_g2_i1	4.9696	4.72307	6.38366	5.62698	Q6A6K4	RL10_CUTAK	4.39e-118
DN283577_c0_g3_i1	5.25126	5.97738	6.27864	5.13512	P50216	IDH_CORGL	4.5e-118
DN46286_c0_g1_i5	5.32811	6.21089	4.85179	6.1606	Q80U96	XPO1_RAT	4.9e-118
DN187176_c0_g2_i1	5.16741	4.84725	5.86146	5.38905	C0SPA5	ADHA_BACSU	5.07e-118
DN25135_c0_g1_i4	5.90972	5.38837	4.95619	4.76453	Q13393	PLD1_HUMAN	5.23e-118
DN68600_c0_g1_i2	6.59602	7.37949	7.57094	6.66447	Q9ULG1	INO80_HUMAN	5.8e-118
DN149822_c0_g1_i1	4.8469	5.47171	5.89906	5.55343	Q57290	Y740_HAEIN	6.35e-118
DN8416_c0_g1_i1	5.12227	5.44468	5.60631	5.79214	Q5ZIY5	2ABD_CHICK	6.58e-118
DN19799_c0_g2_i3	4.9696	5.19676	5.65301	5.5147	Q9CBQ2	RIR2_MYCLE	6.84e-118
DN16734_c0_g1_i6	5.07456	6.01115	4.85179	5.13512	Q711T7	NADE_MOUSE	8.05e-118
DN183263_c0_g1_i1	5.52816	5.75217	4.16106	4.16106	Q9I8E6	COPG2_TAKRU	8.15e-118
DN24433_c0_g1_i1	5.36433	5.16055	5.55755	5.2452	Q5R889	SAHH3_PONAB	8.58e-118
DN77775_c0_g1_i7	5.61547	5.96014	5.20346	5.79214	Q5R8I6	TBC23_PONAB	8.76e-118
DN102590_c0_g2_i1	4.59726	5.35898	5.82265	6.01596	Q5AWS6	CDC48_EMENI	8.78e-118
DN244680_c0_g1_i1	4.77563	5.97738	5.69783	6.55106	Q9X806	QCRB_STRCO	8.8e-118
DN564_c0_g1_i3	10.8513	12.4133	11.2355	11.1702	Q61245	COBA1_MOUSE	1.08e-117
DN564_c0_g1_i5	10.3336	12.3221	10.482	10.9964	Q61245	COBA1_MOUSE	1.08e-117
DN564_c0_g1_i10	10.2724	12.2987	10.5573	11.0333	Q61245	COBA1_MOUSE	1.08e-117
DN11597_c0_g1_i1	5.07456	5.92492	6.16435	6.44559	Q02337	BDH_BOVIN	1.13e-117
DN163313_c0_g1_i1	4.8469	4.16106	6.35818	6.11421	P0CZ03	RECA_CUTAK	1.14e-117
DN371856_c0_g1_i1	6.19855	4.16106	4.72681	5.66199	A1B4I6	ACCA_PARDP	1.15e-117
DN32877_c0_g2_i1	5.12227	5.59736	5.33615	5.47449	P19769	INSK_ECOLI	1.29e-117
DN1254_c0_g1_i2	6.01363	6.40831	6.57155	6.09036	Q6GLT8	FAHD2_XENLA	1.32e-117
DN2163_c0_g1_i1	9.76907	8.6536	9.19714	10.2936	P24862	CCNB_PATVU	1.45e-117
DN16916_c0_g1_i1	5.74727	6.0277	4.16106	5.2956	Q7L5Y1	ENOF1_HUMAN	1.56e-117
DN303_c0_g1_i2	12.3208	12.6589	12.7955	13.1239	P62243	RS8_RAT	1.67e-117
DN135128_c0_g1_i1	4.8469	4.16106	5.27216	6.58445	P19480	AHPF_SALTY	1.98e-117
DN143353_c0_g1_i1	5.43304	5.87008	4.56238	4.16106	Q9BGI2	PRDX4_BOVIN	1.99e-117
DN93211_c0_g1_i3	5.79601	6.25285	4.95619	5.55343	P16086	SPTN1_RAT	2.13e-117
DN4898_c0_g1_i11	7.219	7.31792	6.81182	6.94451	Q8N392	RHG18_HUMAN	2.26e-117
DN280821_c0_g1_i1	6.18122	4.16106	4.56238	4.16106	A1B0E4	YIDC_PARDP	2.31e-117
DN420923_c0_g1_i1	5.58714	5.49806	5.12901	4.16106	P98002	COX1B_PARDE	2.37e-117
DN2131_c0_g1_i7	5.81964	5.85122	5.89906	5.90923	Q9UBQ7	GRHPR_HUMAN	2.47e-117
DN2580_c0_g1_i4	6.92247	7.4093	7.1228	6.75466	Q6QHC5	DEGS2_HUMAN	2.86e-117
DN5023_c0_g1_i5	4.77563	6.69324	4.16106	5.0085	Q63HN8	RN213_HUMAN	2.91e-117
DN37737_c0_g1_i1	6.62123	6.09177	6.27864	6.71031	Q64270	EI2BA_RAT	3.02e-117
DN6609_c0_g1_i3	5.74727	6.30675	4.56238	6.13761	Q8BWW9	PKN2_MOUSE	4.07e-117
DN9499_c0_g1_i1	7.10081	6.76069	6.73635	5.88102	Q9JHW4	SELB_MOUSE	4.12e-117
DN37132_c0_g1_i1	7.98218	8.34363	8.10672	8.13059	O43290	SNUT1_HUMAN	4.15e-117
DN73953_c0_g1_i1	8.58298	7.86447	8.37928	9.05448	Q96A44	SPSB4_HUMAN	4.86e-117
DN38450_c0_g1_i2	6.97167	7.51168	7.3271	7.52652	Q2TLY2	MACO1_DANRE	5.72e-117
DN433593_c0_g1_i1	5.52816	4.16106	5.9709	5.76095	B0VNF6	ALR_ACIBS	5.85e-117
DN29578_c0_g1_i1	6.82923	6.28008	6.50416	6.55106	Q1RML7	MAK16_BOVIN	6.42e-117
DN7745_c0_g1_i2	5.7719	5.96014	5.60631	5.76095	Q28D01	WDR26_XENTR	6.43e-117
DN1774_c0_g1_i1	5.88783	5.35898	4.72681	6.26969	P19623	SPEE_HUMAN	6.45e-117
DN1349_c0_g1_i3	6.68226	7.75323	8.11402	6.76912	P43006	EAA2_MOUSE	6.53e-117
DN31227_c0_g1_i1	5.93122	6.01115	5.27216	5.47449	O60216	RAD21_HUMAN	6.82e-117
DN104174_c0_g1_i1	4.8469	5.75217	4.16106	6.04126	C3YWU0	FUCO_BRAFL	8.15e-117
DN4543_c0_g2_i2	12.2829	13.1788	13.702	13.7706	P61314	RL15_RAT	8.27e-117
DN351793_c0_g1_i1	5.02386	5.75217	5.39618	4.16106	Q6A9W7	LIPB_CUTAK	8.48e-117
DN307753_c0_g1_i1	4.8469	5.59736	4.95619	5.88102	A0R1C2	DHE2_MYCS2	9.87e-117
DN250768_c0_g2_i1	5.25126	5.16055	5.74095	5.13512	P49666	RL21_PIG	1.63e-116
DN1096_c0_g1_i5	6.71761	6.71285	7.24891	6.71031	Q5ZJ60	HIBCH_CHICK	1.64e-116
DN6070_c0_g1_i1	8.99595	7.72991	7.60258	9.61446	P24862	CCNB_PATVU	1.7e-116
DN2573_c0_g2_i8	6.50387	6.95333	6.65646	7.0185	Q3U0J8	TBD2B_MOUSE	1.72e-116
DN268423_c0_g1_i1	5.95235	5.7928	4.56238	4.76453	Q8K370	ACD10_MOUSE	2.16e-116
DN32135_c0_g2_i3	4.77563	4.72307	4.72681	6.64884	B2GIL1	EFG_KOCRD	2.17e-116
DN18388_c0_g1_i2	7.09198	7.58126	7.42502	7.0185	Q5BJD5	TM41B_HUMAN	2.26e-116
DN8427_c0_g1_i10	4.16106	6.04403	4.16106	5.47449	Q5HYM0	ZC12B_HUMAN	2.27e-116
DN60490_c0_g1_i1	5.90972	5.04158	5.65301	5.69594	C5CCF5	PYRB_MICLC	2.51e-116
DN8426_c0_g1_i3	5.49741	5.57338	5.04733	5.34345	Q6DCD1	FGGY_XENLA	2.55e-116
DN474319_c0_g1_i1	8.53881	6.65314	4.16106	5.72891	Q2HJ74	GATM_BOVIN	2.79e-116
DN1343_c0_g1_i1	7.61203	7.72047	7.59211	8.20002	P13051	UNG_HUMAN	2.97e-116
DN83636_c0_g1_i1	6.37518	5.38837	5.74095	4.16106	A1AZG3	GLMM_PARDP	3.25e-116
DN7748_c0_g1_i13	4.69429	5.92492	4.85179	5.47449	A2AJK6	CHD7_MOUSE	3.32e-116
DN205718_c0_g1_i1	5.02386	4.16106	6.54946	5.85212	Q8NNC1	ISPT2_CORGL	4.16e-116
DN462_c0_g1_i2	6.18122	6.61182	5.27216	6.06605	P12716	ACTC_PISOC	4.25e-116
DN2914_c0_g1_i9	6.31369	7.1296	5.33615	6.13761	O54988	SLK_MOUSE	4.7e-116
DN34705_c1_g1_i1	5.16741	5.47171	6.07136	5.13512	A1R4R1	GATA_PAEAT	4.89e-116
DN22473_c0_g1_i1	5.07456	5.12275	5.33615	6.22716	Q8FL49	AROP_ECOL6	4.97e-116
DN1810_c0_g1_i2	8.62582	8.21561	8.99113	9.73592	Q7T3B0	EIF3M_DANRE	5.15e-116
DN82388_c0_g2_i1	4.59726	5.59736	5.9709	4.51116	O17438	DHX15_STRPU	5.29e-116
DN228642_c0_g1_i1	6.29786	4.99765	4.16106	5.13512	D5AQI9	RPOD_RHOCB	5.82e-116
DN10618_c0_g1_i2	6.43392	6.61182	7.27546	7.10012	Q92117	TBP_PROFL	6.41e-116
DN78397_c0_g1_i2	6.69415	4.55971	4.16106	5.79214	Q6A7M5	IF2_CUTAK	8.51e-116
DN733_c0_g1_i3	8.60456	9.45399	7.52762	9.54661	P28799	GRN_HUMAN	8.61e-116
DN183300_c0_g1_i3	5.99354	5.71006	4.56238	4.16106	Q9N1R6	BAT1_RABIT	9.13e-116
DN4328_c0_g1_i2	7.07413	6.09177	6.57155	7.29042	Q67ER4	R113A_BOVIN	9.36e-116
DN10329_c1_g1_i5	5.25126	5.29741	6.38366	6.06605	P60230	TRA1_MYCTU	9.84e-116
DN133123_c0_g1_i3	6.29786	6.39604	6.79334	6.74004	Q641Y8	DDX1_RAT	1.02e-115
DN80993_c0_g1_i4	5.16741	4.84725	6.27864	6.18317	A9WNA0	GH101_RENSM	1.04e-115
DN9854_c0_g1_i2	6.93245	6.50261	7.15182	6.94451	Q6P963	GLO2_DANRE	1.07e-115
DN454367_c0_g1_i1	11.5086	11.8711	12.1258	12.8456	P29314	RS9_RAT	1.14e-115
DN9854_c0_g1_i1	6.37518	6.19659	6.83006	6.55106	Q6P963	GLO2_DANRE	1.33e-115
DN14939_c0_g2_i3	9.18976	5.16055	7.43679	5.47449	P18416	TRA3_STAAU	1.35e-115
DN48631_c0_g1_i1	6.10947	4.72307	4.95619	4.65498	A1B9E9	RL25_PARDP	1.47e-115
DN4994_c0_g2_i1	6.26559	6.54737	6.1341	7.31005	Q58CP0	IDH3G_BOVIN	1.57e-115
DN299757_c0_g1_i2	4.47008	4.16106	4.56238	6.60084	Q9K0I2	PPSA_NEIMB	1.57e-115
DN2977_c0_g1_i5	6.03339	6.12261	4.16106	5.0085	O14775	GNB5_HUMAN	1.62e-115
DN26881_c0_g1_i3	7.11832	7.67719	6.16435	6.86633	Q90705	EF2_CHICK	1.73e-115
DN71907_c0_g1_i2	5.97311	5.08318	5.33615	4.16106	P29925	NQO13_PARDE	1.96e-115
DN5437_c0_g1_i3	8.61978	10.7524	7.1228	8.6293	P01025	CO3_PIG	1.99e-115
DN10754_c0_g1_i2	6.21564	6.5692	5.55755	5.76095	Q92598	HS105_HUMAN	2.21e-115
DN24809_c0_g1_i3	7.66022	6.0277	5.20346	5.55343	O95995	DRC4_HUMAN	2.23e-115
DN8990_c0_g1_i4	5.39927	6.62227	4.16106	4.51116	Q9JI92	SDCB1_RAT	2.24e-115
DN1570_c0_g1_i4	12.1357	12.5871	12.8163	13.0063	Q5ZJ56	RL7_CHICK	2.32e-115
DN294352_c0_g1_i1	4.16106	4.16106	5.9709	5.90923	Q6A5D2	UXUA_CUTAK	2.45e-115
DN141770_c0_g3_i1	6.09088	4.16106	5.60631	4.51116	P98059	COX1_RHOCA	2.57e-115
DN266869_c0_g1_i1	6.50387	6.49118	5.50647	4.16106	Q60779	DRC4_MOUSE	2.65e-115
DN4818_c0_g1_i16	5.32811	5.66633	5.129	4.65498	Q01085	TIAR_HUMAN	2.96e-115
DN3500_c0_g1_i3	8.13442	8.0897	8.4033	8.04024	Q90ZY6	TLK1B_DANRE	3.08e-115
DN187196_c2_g2_i5	5.6431	5.12275	5.04733	5.34345	C5C9U0	PNP_MICLC	3.1e-115
DN254901_c0_g1_i1	5.7719	5.52376	6.3057	6.04126	Q6A7W9	NADK_CUTAK	3.16e-115
DN140777_c0_g1_i1	6.77456	5.19676	4.56238	5.0085	A1B030	RL2_PARDP	3.67e-115
DN2977_c0_g1_i1	7.7903	7.58126	7.3271	7.27051	O14775	GNB5_HUMAN	3.72e-115
DN452347_c0_g1_i1	5.6431	6.82496	5.69783	5.72891	P62282	RS11_RAT	3.76e-115
DN2835_c0_g1_i1	7.03774	6.70308	6.84805	7.37669	Q4V9Y0	VPS51_XENTR	3.79e-115
DN6143_c0_g1_i2	8.40106	8.60594	8.88444	7.70689	Q5ZIT5	RAB10_CHICK	4.02e-115
DN2297_c0_g1_i6	7.83814	7.53885	8.84996	7.91863	O60508	PRP17_HUMAN	5.47e-115
DN21693_c0_g1_i1	7.02849	4.16106	4.16106	4.16106	Q5LLW6	DMDD_RUEPO	6.03e-115
DN4818_c0_g1_i15	5.61548	5.94266	4.85179	5.47449	Q01085	TIAR_HUMAN	6.07e-115
DN244021_c1_g1_i1	4.47008	6.01115	6.86582	7.49267	Q9Z6S5	RIR1_CHLPN	6.56e-115
DN40800_c0_g1_i1	5.7719	6.21089	4.16106	5.43267	Q8IZQ1	WDFY3_HUMAN	6.9e-115
DN850_c0_g1_i7	8.94373	8.67563	9.1305	8.64085	Q4H2R2	SSRP1_CIOIN	6.95e-115
DN56536_c0_g4_i2	5.81964	5.85122	6.79334	5.88102	Q6A814	ARGB_CUTAK	7.19e-115
DN19466_c0_g1_i4	6.29786	6.8339	7.04748	6.78344	P0C5E3	PALLD_RAT	7.24e-115
DN4741_c0_g2_i2	6.76336	6.70308	6.45727	6.85286	Q6NUX8	RHOAA_DANRE	7.68e-115
DN45318_c1_g4_i1	6.32934	4.55971	4.72681	4.65498	Q5YNB0	PCKG_NOCFA	7.75e-115
DN1050_c0_g1_i2	7.94872	7.00151	8.10672	8.45704	Q9D819	IPYR_MOUSE	8.47e-115
DN20039_c0_g1_i2	10.4773	11.0001	11.1681	11.7448	P62907	RL10A_RAT	9.4e-115
DN260866_c0_g1_i2	5.43304	4.9011	5.55755	5.69594	Q9XAR5	NUOL_STRCO	9.5e-115
DN30507_c0_g1_i1	6.3448	6.16751	4.16106	5.07429	Q3V6T2	GRDN_HUMAN	1.02e-114
DN12211_c0_g1_i7	6.09088	5.99439	4.16106	5.69594	O43184	ADA12_HUMAN	1.1e-114
DN38235_c0_g1_i6	6.3448	6.61182	5.69783	5.07429	Q28021	ROCK2_BOVIN	1.15e-114
DN99614_c0_g1_i2	5.6431	5.44468	5.65301	5.13512	A3M1F6	EFTU_ACIBT	1.18e-114
DN4381_c0_g1_i1	5.55806	6.38365	7.1228	6.79761	Q6ZPV2	INO80_MOUSE	1.18e-114
DN11800_c0_g1_i1	6.32934	5.7928	6.10312	5.13512	C5CC59	RL2_MICLC	1.23e-114
DN76227_c0_g1_i1	7.1945	7.10051	7.28855	7.47544	Q5ZJW4	SC22B_CHICK	1.25e-114
DN7142_c0_g1_i1	6.92247	6.51394	7.38909	6.55106	Q28ID3	GLRX3_XENTR	1.42e-114
DN42486_c0_g1_i2	6.3448	5.47171	4.16106	5.19187	Q96JB1	DYH8_HUMAN	1.47e-114
DN3947_c0_g1_i14	4.77563	5.64381	5.33615	5.62698	P59384	ATS15_MOUSE	1.66e-114
DN232389_c0_g1_i1	7.05605	5.83207	5.27216	5.19187	Q98I87	CARB_RHILO	1.72e-114
DN55742_c1_g1_i1	5.69638	5.23156	6.48092	4.51116	P9WQ19	TRES_MYCTU	1.86e-114
DN91592_c0_g1_i1	5.12227	4.84725	4.16106	6.33099	P52156	RHO_RHOS4	2e-114
DN10375_c0_g1_i1	6.96197	8.07131	5.04733	7.69208	P0C6B8	SVEP1_RAT	2.04e-114
DN27068_c0_g2_i1	5.72211	5.44468	6.73635	6.04126	Q9UNP9	PPIE_HUMAN	2.21e-114
DN684_c0_g3_i1	6.99087	6.75125	5.9709	6.26969	Q8NBS9	TXND5_HUMAN	2.48e-114
DN28967_c0_g1_i1	5.58714	6.16751	4.72681	4.16106	Q8NFP9	NBEA_HUMAN	2.51e-114
DN58386_c0_g1_i1	7.01918	7.15811	7.43679	7.08875	Q9ES53	UFD1_RAT	2.71e-114
DN6095_c0_g1_i4	5.29047	5.96014	5.27216	5.07429	P35224	CTNB_URECA	2.86e-114
DN83221_c1_g1_i1	6.70593	4.84725	4.95619	4.93646	P9WQK3	ETTA_MYCTU	2.87e-114
DN56361_c0_g1_i1	6.80762	6.76069	6.3322	7.06573	Q6DEL2	CLPT1_DANRE	2.92e-114
DN24644_c0_g1_i1	5.58714	6.35851	5.9709	4.93646	E9Q555	RN213_MOUSE	3.11e-114
DN49440_c0_g3_i2	4.47008	4.84725	6.27864	5.85212	A0A0C5URS1	PEPCK_PROFF	3.91e-114
DN28639_c0_g1_i2	6.5573	7.15103	6.91777	6.22716	Q28041	ACVR1_BOVIN	4.58e-114
DN12859_c0_g1_i1	5.6431	5.16055	4.16106	5.62698	Q15700	DLG2_HUMAN	5.62e-114
DN404014_c0_g1_i1	6.40488	4.84725	5.4528	4.51116	Q6A6R1	RPOA_CUTAK	5.78e-114
DN1913_c0_g1_i6	6.60868	6.46803	6.65646	6.61703	Q9UHL4	DPP2_HUMAN	6.2e-114
DN13181_c0_g1_i4	7.52354	6.70308	6.45727	5.0085	Q8IYE0	CC146_HUMAN	6.25e-114
DN129661_c0_g1_i1	5.72211	4.44339	6.57155	4.16106	P67131	Y2387_MYCBO	6.36e-114
DN3998_c0_g2_i11	9.4686	7.37346	9.45103	8.35782	P30260	CDC27_HUMAN	6.54e-114
DN208710_c0_g1_i1	6.23251	5.64381	6.48092	5.66199	Q9CR47	NSA2_MOUSE	6.72e-114
DN59147_c0_g1_i4	5.86553	6.37114	5.129	6.29045	Q8BVD5	MPP7_MOUSE	7.22e-114
DN354609_c0_g1_i1	5.46572	5.35898	5.33615	5.0085	P12894	POL_IPMAI	7.66e-114
DN12060_c0_g1_i3	6.64597	7.04808	7.01617	6.44559	Q4R550	SYCC_MACFA	7.99e-114
DN121854_c0_g1_i1	5.25126	4.64854	5.55755	5.69594	P9WFS1	TYPH_MYCTU	8.23e-114
DN33334_c0_g1_i2	4.77563	4.55971	6.0053	5.79214	Q91233	HSP70_ONCTS	8.25e-114
DN4887_c0_g1_i1	9.01218	9.81503	9.36823	9.55273	Q6NYB7	RAB1A_RAT	8.58e-114
DN118223_c1_g1_i1	6.54414	4.95099	4.16106	4.16106	A1B8E9	RS2_PARDP	9.09e-114
DN181824_c0_g1_i1	5.32811	5.75217	5.39618	4.16106	Q9CXF4	TBC15_MOUSE	9.28e-114
DN295047_c2_g1_i1	5.39928	5.66633	5.55755	5.38905	P62982	RS27A_RAT	1.04e-113
DN321_c0_g1_i5	7.21088	6.43252	7.04748	6.72526	Q53QZ3	RHG15_HUMAN	1.17e-113
DN4892_c0_g1_i1	6.24916	7.3613	6.79334	7.60777	Q9BUQ8	DDX23_HUMAN	1.23e-113
DN13676_c0_g2_i2	5.12227	7.63759	6.45727	6.22716	Q86TH1	ATL2_HUMAN	1.29e-113
DN80547_c0_g1_i1	4.77563	6.33289	5.86146	5.55343	C5C9D1	GLMU_MICLC	1.34e-113
DN47090_c1_g1_i1	5.02386	5.44468	5.55755	5.72891	Q6AEK9	RNPH_LEIXX	1.37e-113
DN32113_c0_g1_i1	6.1278	4.64854	4.16106	4.16106	C3PGS1	SYT_CORA7	1.39e-113
DN15092_c0_g1_i1	5.81964	5.49806	5.9709	5.69594	Q62148	AL1A2_MOUSE	1.43e-113
DN18500_c0_g1_i2	5.88783	5.97738	4.56238	4.16106	Q5TKR9	KAT6A_RAT	1.63e-113
DN12073_c0_g1_i2	6.10947	5.47171	4.16106	4.16106	Q6A6K7	RPOC_CUTAK	1.64e-113
DN63470_c0_g1_i1	5.25126	5.88864	4.16106	4.16106	Q9BXF9	TEKT3_HUMAN	1.69e-113
DN14998_c0_g1_i5	5.52816	5.57338	4.16106	5.72891	P54687	BCAT1_HUMAN	1.72e-113
DN46633_c0_g1_i3	7.32048	8.74673	6.251	6.49937	Q95029	CATL_DROME	2.14e-113
DN34510_c0_g2_i1	6.05285	6.51394	4.56238	5.2956	Q9EPU0	RENT1_MOUSE	2.18e-113
DN221146_c0_g1_i1	6.57033	4.9011	4.85179	4.93646	A1B474	AROA_PARDP	2.32e-113
DN75889_c0_g1_i1	6.76336	7.06326	7.09316	6.85286	Q15751	HERC1_HUMAN	2.36e-113
DN70811_c0_g1_i1	5.84281	5.32869	5.74095	4.85623	Q8VEM8	MPCP_MOUSE	2.7e-113
DN45430_c0_g1_i4	4.69429	5.57338	4.16106	5.85212	C5C7X8	GYRB_MICLC	2.75e-113
DN37432_c0_g1_i1	5.67005	5.49806	5.4528	4.16106	Q9I2V5	ACNB_PSEAE	2.78e-113
DN90126_c1_g1_i1	5.7719	5.85123	5.33615	5.34345	P9WPX3	AK_MYCTU	2.91e-113
DN174051_c0_g1_i1	5.6431	5.83207	4.85179	5.62698	A0R0B0	ODP1_MYCS2	3.04e-113
DN14964_c0_g1_i2	7.49721	7.4327	7.49424	7.04231	P00389	NCPR_RABIT	3.16e-113
DN1582_c0_g1_i1	6.07201	6.44446	6.48092	6.06605	Q8BQS5	PAQR2_MOUSE	3.27e-113
DN259964_c0_g1_i1	6.24916	5.66633	6.0053	5.85212	C5C9U0	PNP_MICLC	3.77e-113
DN6709_c0_g1_i3	5.99354	5.99439	6.22276	6.55106	Q5ZIP4	XRN2_CHICK	4.15e-113
DN262401_c0_g1_i1	5.84281	5.47171	6.1341	6.74004	Q82BB8	FABH1_STRAW	4.19e-113
DN11964_c0_g1_i3	5.86553	5.83207	4.16106	6.06605	P47934	CACP_MOUSE	4.21e-113
DN1338_c0_g1_i7	7.25102	8.08604	5.60631	6.37031	Q66JF3	MKNK1_XENTR	4.43e-113
DN24218_c0_g1_i2	6.26559	6.86038	7.10805	5.99014	Q6DFH9	NIP7_XENLA	4.49e-113
DN16460_c0_g1_i2	5.21031	5.94266	5.39618	4.16106	O89114	DNJB5_MOUSE	4.96e-113
DN88548_c0_g1_i1	5.88783	5.26507	5.12901	4.51116	Q4LE85	RB27A_PIG	5.27e-113
DN509884_c0_g1_i1	4.77563	5.7313	5.39618	5.34345	Q91VS7	MGST1_MOUSE	5.56e-113
DN1632_c0_g1_i2	7.02849	7.30528	6.0053	6.67993	Q9CU62	SMC1A_MOUSE	5.77e-113
DN1322_c0_g1_i3	7.47038	8.5828	8.25278	7.99283	Q26534	CATL_SCHMA	5.96e-113
DN744_c0_g1_i2	6.76336	6.77005	6.86582	6.63303	Q58FK9	KAT3_RAT	6.72e-113
DN210_c0_g1_i1	5.69638	5.6884	4.16106	5.5147	Q04736	YES_MOUSE	7.08e-113
DN2745_c0_g1_i7	6.43392	6.9936	6.69699	6.91894	Q7TNC4	LC7L2_MOUSE	7.37e-113
DN2745_c0_g1_i8	6.16366	6.77936	6.59328	6.63303	Q7TNC4	LC7L2_MOUSE	7.37e-113
DN2745_c0_g1_i1	6.21564	6.81596	6.3322	6.90597	Q7TNC4	LC7L2_MOUSE	7.37e-113
DN7254_c0_g1_i1	5.39927	6.16751	6.79334	6.01596	Q9BT22	ALG1_HUMAN	8.82e-113
DN3454_c0_g1_i2	7.51044	8.04515	7.09315	7.50121	A1L1C7	PAN3_XENTR	8.92e-113
DN11281_c0_g1_i4	6.21564	5.96014	5.60631	5.2452	Q8R3S6	EXOC1_MOUSE	1e-112
DN466548_c0_g1_i1	5.84281	5.54886	4.56238	4.16106	Q68F70	INT4_XENLA	1.01e-112
DN91189_c0_g1_i2	5.69638	5.71006	5.86146	6.26969	Q8NS92	PDXR_CORGL	1.07e-112
DN42467_c0_g1_i5	4.47008	5.49806	6.07136	6.11421	Q3S8P9	OXYQ_STRRM	1.1e-112
DN9879_c0_g2_i1	5.69638	5.8126	4.72681	5.62698	Q9JHU4	DYHC1_MOUSE	1.18e-112
DN1880_c0_g1_i5	7.21088	7.80325	7.49424	7.75753	Q86UA1	PRP39_HUMAN	1.34e-112
DN6756_c0_g1_i2	6.24916	5.7313	4.95619	5.0085	Q8RY16	PEX6_ARATH	1.53e-112
DN5023_c1_g1_i1	5.90972	7.1296	4.56238	5.47449	Q63HN8	RN213_HUMAN	1.7e-112
DN55251_c0_g1_i1	4.9696	6.09177	5.50647	4.16106	A1R8N0	TSAD_PAEAT	1.73e-112
DN252350_c0_g3_i1	6.29786	4.16106	5.04733	4.16106	Q98AZ3	THIC_RHILO	1.76e-112
DN1616_c0_g1_i9	6.47633	7.14393	7.74158	7.42243	P35790	CHKA_HUMAN	1.77e-112
DN204780_c0_g3_i1	6.76336	4.9011	4.72681	4.51116	B3Q9Q6	PPK1_RHOPT	1.79e-112
DN2328_c0_g1_i6	5.07456	5.87008	4.16106	4.85623	Q9D1Q6	ERP44_MOUSE	2.3e-112
DN256280_c0_g2_i1	5.84281	5.38837	4.85179	4.16106	P05444	CLPA_RHOBL	2.46e-112
DN12332_c0_g2_i1	6.97167	7.51715	7.03191	7.17723	P97858	S35B1_MOUSE	2.58e-112
DN4552_c0_g1_i1	7.54297	7.3613	7.24891	7.72881	O95619	YETS4_HUMAN	2.7e-112
DN43785_c0_g1_i2	5.16741	5.19676	4.16106	5.9368	Q14008	CKAP5_HUMAN	3.57e-112
DN7462_c0_g1_i1	7.7352	6.7886	7.15182	7.05407	Q5EA79	GALM_BOVIN	3.8e-112
DN24397_c0_g1_i1	5.7719	5.12275	6.1341	6.44559	Q2TA06	AURKA_BOVIN	4.06e-112
DN165743_c0_g2_i1	6.05285	5.23156	4.16106	4.16106	P0AFG8	ODP1_ECOLI	4.25e-112
DN211011_c0_g1_i1	5.25126	5.75217	6.16435	6.38953	Q57290	Y740_HAEIN	4.37e-112
DN102486_c0_g1_i3	5.29047	5.7313	4.16106	4.85623	Q6F7T7	RPOA_ACIAD	5.09e-112
DN88164_c0_g1_i2	7.35765	4.16106	4.16106	4.16106	P05682	REPA_AGRRH	5.26e-112
DN80449_c0_g1_i1	4.91098	5.66633	5.86146	5.43267	Q8FP04	KPYK_COREF	5.54e-112
DN18164_c0_g1_i3	5.55806	5.85122	4.16106	4.76453	Q9TUM3	STA5B_BOVIN	5.6e-112
DN30310_c0_g1_i1	5.29047	6.07605	4.16106	5.38906	P27041	AVR2B_XENLA	5.66e-112
DN24179_c0_g2_i2	11.8739	12.068	12.3788	12.6641	Q90YR7	RS7_ICTPU	6.18e-112
DN5573_c0_g1_i1	7.02849	7.46709	7.42502	7.69951	Q3MHN0	PSB6_BOVIN	7.21e-112
DN99983_c1_g2_i2	5.6431	5.16055	5.4528	4.51116	A1B039	RL5_PARDP	7.64e-112
DN376_c0_g1_i5	7.12699	6.59068	6.48092	7.00644	P61222	ABCE1_MOUSE	8.73e-112
DN144372_c2_g1_i1	5.88783	4.95099	5.50647	4.16106	Q46ZL2	3HAPM_CUPNJ	9.6e-112
DN3156_c0_g1_i2	7.92433	7.1296	6.1341	6.42716	A5PJX7	S6A13_BOVIN	1.04e-111
DN32773_c0_g1_i2	5.79601	6.76069	4.16106	5.55343	Q2KHP8	TYW1_XENLA	1.04e-111
DN1396_c0_g1_i1	7.25891	7.22019	7.83315	7.31005	Q9WUP7	UCHL5_MOUSE	1.09e-111
DN9642_c0_g1_i1	5.25126	6.12261	4.16106	5.59082	O75122	CLAP2_HUMAN	1.14e-111
DN3457_c0_g1_i1	6.23251	5.88864	7.18025	6.37031	P50867	CYSK_EMENI	1.32e-111
DN142074_c0_g1_i1	5.39928	4.72307	6.10312	6.01596	Q6A5H2	ALR_CUTAK	1.48e-111
DN448311_c0_g1_i1	5.58714	6.23901	5.89906	5.19187	Q04972	VIPA_SALTI	1.56e-111
DN26541_c0_g1_i1	5.86553	4.95099	4.72681	5.2956	Q8RQL9	IDH_COREF	1.61e-111
DN8814_c0_g1_i1	7.45677	6.62227	7.97647	8.27616	Q10713	MPPA_HUMAN	2.02e-111
DN15899_c0_g1_i2	7.93414	5.29741	5.04733	4.93646	P16942	T629_SHISO	2.09e-111
DN20988_c0_g1_i1	6.92247	6.77005	7.93579	7.55958	Q5R7W3	CWC27_PONAB	2.26e-111
DN12894_c0_g1_i10	5.61548	7.17214	5.55755	7.08875	Q9ULL1	PKHG1_HUMAN	2.3e-111
DN181761_c1_g1_i1	5.43304	4.99765	5.82265	5.85212	Q8GAI8	SSDH_PAENI	2.57e-111
DN22919_c0_g1_i4	5.61548	6.12261	5.65301	6.04126	A3KN83	SBNO1_HUMAN	2.83e-111
DN392772_c0_g1_i1	6.58323	4.64854	4.16106	4.16106	G2IQQ8	LIGK_SPHSK	3.11e-111
DN90499_c0_g2_i1	8.46317	5.23156	5.04733	4.16106	P33691	EXOA_RHIME	3.26e-111
DN216242_c0_g1_i1	5.67005	5.41692	7.04748	5.43267	B8H8Q4	PYRD_PSECP	3.39e-111
DN860_c0_g1_i13	7.84335	7.97955	8.58744	7.82009	P21127	CD11B_HUMAN	3.43e-111
DN7950_c0_g1_i1	6.5573	6.33289	5.39618	5.69594	Q6P1R4	DUS1L_HUMAN	3.9e-111
DN182863_c0_g1_i2	6.41948	4.95099	5.27216	4.76453	Q1XDP7	YCF24_PYRYE	3.92e-111
DN2701_c0_g1_i1	8.95577	9.32688	9.05306	8.80379	O55125	NIPS1_MOUSE	4.79e-111
DN17716_c0_g1_i8	5.16741	5.7928	4.16106	5.88102	P30676	GNAI_PATPE	5.02e-111
DN152041_c0_g1_i1	5.02386	5.99439	4.72681	5.72891	A9WV65	PURL_RENSM	5.34e-111
DN426398_c0_g1_i1	5.32811	5.41692	6.0053	5.66199	Q62264	THRSP_MOUSE	5.81e-111
DN69436_c0_g1_i5	6.09088	5.96014	4.95619	5.34345	A0JZ93	RPOB_ARTS2	5.92e-111
DN5671_c0_g1_i21	5.61548	5.7313	4.16106	5.13512	Q5H9R7	PP6R3_HUMAN	6.06e-111
DN4118_c0_g1_i3	4.9696	5.83207	5.129	5.72891	Q2HJ88	RTCA_BOVIN	6.38e-111
DN13517_c0_g1_i2	7.74081	7.60714	7.94402	7.65438	Q5F364	MRP1_CHICK	6.46e-111
DN24205_c0_g3_i2	6.03339	5.7313	5.93551	5.90923	F1R777	MTA70_DANRE	7.4e-111
DN34700_c0_g1_i6	5.61548	5.41692	6.1341	5.69594	O77457	T23O_ANOGA	8.11e-111
DN97903_c0_g1_i5	8.10437	7.46141	7.18025	7.86692	E2R766	EXOC6_CANLF	8.23e-111
DN263455_c0_g1_i1	6.3448	6.01115	4.16106	4.16106	P23098	DYHC_TRIGR	8.74e-111
DN33272_c0_g1_i1	6.49017	5.59736	6.03877	5.9368	P61210	ARF1_LOCMI	9.61e-111
DN114592_c0_g1_i2	5.88783	4.84725	5.27216	5.72891	P36879	YADG_ECOLI	1.03e-110
DN4108_c0_g2_i1	6.5573	7.07828	7.61297	5.59082	Q4QQV8	CHMP5_RAT	1.06e-110
DN132493_c0_g1_i1	5.12227	5.35898	4.16106	6.2486	A5EJ58	RIMO_BRASB	1.19e-110
DN68682_c0_g1_i1	5.90972	5.83207	6.10312	6.66447	P0A9C2	GLPA_SHIFL	1.5e-110
DN378303_c0_g1_i1	6.14586	4.16106	4.16106	5.19187	Q70AC7	5S_PROFR	1.62e-110
DN36306_c0_g1_i1	6.54414	5.99439	6.35819	6.78344	A7M7B9	NTH_CHICK	1.69e-110
DN130673_c0_g1_i1	6.49017	5.08318	6.96785	7.21945	Q87DF8	PIP_XYLFT	1.72e-110
DN2186_c0_g2_i1	7.16116	6.85161	6.57155	7.05407	Q803Z2	YIPF3_DANRE	2.15e-110
DN33272_c0_g1_i3	5.32811	5.6884	4.95619	4.51116	P51643	ARF1_XENLA	2.19e-110
DN141830_c0_g1_i1	9.02137	4.55971	4.16106	4.16106	P42314	YXJC_BACSU	2.23e-110
DN32312_c0_g1_i2	4.69429	6.29348	6.48092	6.09036	O15439	MRP4_HUMAN	2.82e-110
DN85907_c0_g5_i1	6.05285	4.72307	5.33615	5.76095	Q6NFM3	COX1_CORDI	2.83e-110
DN920_c0_g1_i4	7.219	8.46678	8.03155	8.80721	B5X4E0	CALUB_SALSA	3e-110
DN7903_c0_g1_i2	6.63366	6.19659	5.4528	5.72891	G5E8K5	ANK3_MOUSE	3.15e-110
DN72974_c0_g1_i1	5.72211	4.78843	5.4528	5.5147	A1TF55	SERC_MYCVP	4.03e-110
DN60618_c0_g1_i1	5.43304	5.26507	5.39618	6.2486	O88986	KBL_MOUSE	4.42e-110
DN12907_c0_g1_i1	6.14586	6.01115	5.04733	4.16106	Q8BWT5	DIP2A_MOUSE	4.57e-110
DN6222_c0_g2_i1	5.74727	5.47171	6.45727	5.76095	P48147	PPCE_HUMAN	4.71e-110
DN6222_c0_g2_i3	6.26559	5.96014	6.03877	6.66447	P48147	PPCE_HUMAN	4.71e-110
DN12882_c0_g1_i1	6.44821	6.25285	6.38366	6.01596	Q6PFQ2	EIF3C_DANRE	5.19e-110
DN37405_c0_g1_i2	5.16741	4.72307	6.45727	6.71031	P46392	BCCA_MYCLE	5.47e-110
DN6702_c0_g1_i1	6.75206	7.04042	6.84805	7.2401	Q8SPU8	DHRS4_BOVIN	6.41e-110
DN1045_c0_g1_i1	7.05605	6.86038	7.01617	7.13369	Q8VEJ1	GPN2_MOUSE	6.74e-110
DN860_c0_g1_i1	7.92433	7.80771	8.61852	7.98073	P21127	CD11B_HUMAN	7.8e-110
DN11624_c0_g1_i3	5.81964	6.04403	4.16106	4.65498	Q08209	PP2BA_HUMAN	9.56e-110
DN3428_c0_g1_i3	7.11832	6.63264	5.129	6.01596	Q2TA16	DRC2_BOVIN	9.78e-110
DN20693_c0_g1_i2	5.7719	6.09177	5.27216	5.72891	P08183	MDR1_HUMAN	1.03e-109
DN4655_c0_g1_i8	8.26427	7.75786	9.15188	7.51813	Q02040	AK17A_HUMAN	1.38e-109
DN4655_c0_g1_i6	7.11832	7.19294	8.27249	7.87349	Q02040	AK17A_HUMAN	1.38e-109
DN24153_c0_g1_i1	5.86553	4.9011	4.16106	5.96376	A9WSY0	RPOB_RENSM	1.38e-109
DN4397_c0_g1_i2	5.93122	6.50261	6.27864	5.79214	A1A4M4	TATD3_BOVIN	1.49e-109
DN170460_c1_g2_i1	5.39928	5.57338	5.69783	6.56786	A0R0B0	ODP1_MYCS2	1.65e-109
[truncated: 40,477 more rows]
